# Supplementary material for: Enantioselective construction of spirodihydrofuran oxindoles via one-pot organo-/iodine sequential catalysis
Source: Royal Society of Chemistry journal article supplement (doi:10.1039/d3qo01091k), 2023-01-01
Supplement: d3qo01091k1.pdf [file d3qo01091k1.pdf]

# Supporting Information

## Enantioselective Construction of Spirodihydrofuran Oxindoles via One-Pot Organo-/Iodine Sequential Catalysis

Ai-Bao Xia,<sup>1,\*</sup> Li-Sha Huang,<sup>1</sup> Chang-Ping Li,<sup>2</sup> Qing-Bo Hu,<sup>1</sup> Jin-Yao  
Zhu,<sup>1</sup> Liang Bai<sup>1</sup> and Dan-Qian Xu<sup>1,\*</sup>

*<sup>1</sup>Catalytic Hydrogenation Research Centre, State Key Laboratory  
Breeding Base of Green Chemistry-Synthesis Technology, Zhejiang  
University of Technology, Hangzhou, 310014, Zhejiang, China*

*<sup>2</sup>Hangzhou Environmental Protection Co., Ltd, Hangzhou 310063, P.R.  
China*

*Fax (+86) 0571 88320066;*

*E-mail: xiaaibao@zjut.edu.cn; chrc@zjut.edu.cn*

| <b>Table of Contents</b> |                                                                                                                                                      | <b>Page</b>      |
|--------------------------|------------------------------------------------------------------------------------------------------------------------------------------------------|------------------|
| <b>1</b>                 | <b>General information</b>                                                                                                                           | <b>S-3</b>       |
| <b>2</b>                 | <b>Typical experimental procedure for the preparation of substrate 1 and organo-/iodine sequential catalysis, and characterization of products 4</b> | <b>S-4~S-16</b>  |
| <b>3</b>                 | <b>Scale-up experiment</b>                                                                                                                           | <b>S-17</b>      |
| <b>4</b>                 | <b>ESI-MS spectrum</b>                                                                                                                               | <b>S-18</b>      |
| <b>5</b>                 | <b><math>^1\text{H}</math>, <math>^{13}\text{C}</math> NMR spectra and HPLC chromatograms of compounds 4a-4x</b>                                     | <b>S-19~S-66</b> |
| <b>6</b>                 | <b>X-ray crystal structure of the compound 4c</b>                                                                                                    | <b>S-67~S-68</b> |

## 1. General information

NMR data were obtained on Bruker AVANCE III for  $^1\text{H}$  at 500 MHz and for  $^{13}\text{C}$  at 125 MHz with TMS as the internal standard. HRMS data were measured on an Agilent 6545 Q-TOF LC/MS with an ESI source. In each case, enantiomeric excess was determined on a chiral column in comparison with authentic racemates by chiral HPLC, using a JASCO LC-2000 Plus system consisting of MD-2010 HPLC diode array detector or an Agilent 1260 chromatography. Column chromatography and flash chromatography experiments were conducted using silica gel GF254 (200-300 mesh) eluting with ethyl ether and petroleum ether. TLC experiments were carried out on glass-backed silica plates. Chemicals were used without purification as commercially available.

The Boc protected isatin-derived  $\alpha$ -trifluoromethylacrylate was prepared according to a previously reported procedure. For details, see: Q.-X. Lou, Y.-Y. Ding, D.-F. Xu, G.-K. Liu, J.-L. Zhao, *Adv. Synth. Catal.*, 2017, **359**, 2557.

## 2. Typical experimental procedure for the preparation of substrate **1** and organo-/iodine sequential catalysis, and characterization of products **4**

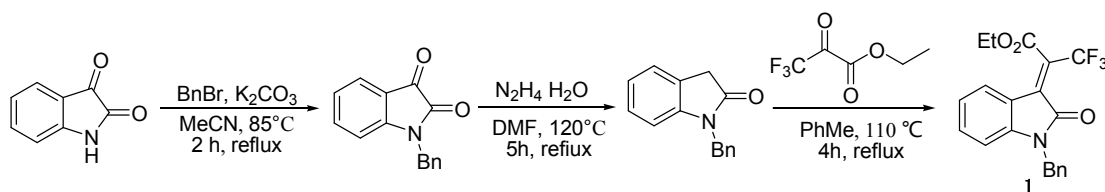

Isatins (10 mmol) and benzyl bromide (12 mmol) were stirred in CH<sub>3</sub>CN (25 mL) in the presence of K<sub>2</sub>CO<sub>3</sub> (12 mmol) at 85 °C for 2 h. Reactions were monitored by TLC. After completion, the reaction mixture was concentrated under reduced pressure. The residue was added into H<sub>2</sub>O (50 mL) and extracted with EtOAc (3×20 mL), then the mixture was dried and concentrated.

The above solid and hydrazine hydrate (10 mL) was directly added in DMF (10 mL), the mixture was stirred at 120 °C for 5 h. After completion, the reaction mixture was concentrated. The residue was purified by flash chromatography (petroleum ether/ethyl acetate =10:1) to give the oxindole.

The oxindole, 3,3,3-trifluoromethyl pyruvic acid ethyl ester (1.98 mL, 15 mmol) and piperidine (0.27 mL, 3 mmol) were stirred in toluene (25 mL) at 110 °C for 4 h. After completion, the reaction mixture was extracted with EtOAc (3×20 mL), washed with water, dried and concentrated. The residue was purified by flash chromatography (petroleum ether/ethyl acetate =10:1) to give **1**.

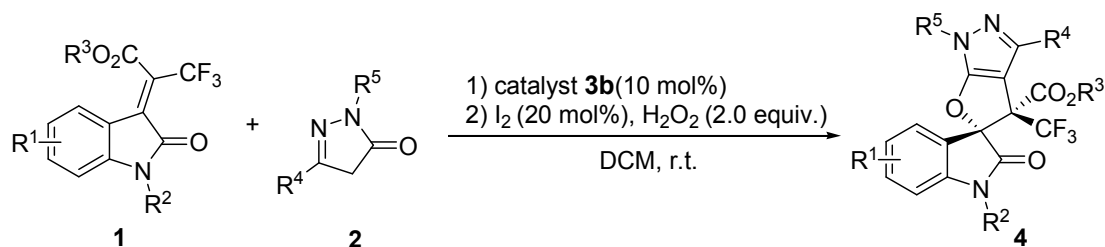

$\alpha$ -Trifluoromethyl acrylates **1** (0.4 mmol) and pyrazolones **2** (0.2 mmol) were stirred in CH<sub>2</sub>Cl<sub>2</sub> (2 mL) in the presence of catalyst **3b** (0.02 mmol) at room temperature for 36 h, then I<sub>2</sub> (0.04 mmol) and 30% H<sub>2</sub>O<sub>2</sub> aqueous solution (0.4 mmol) were added, and the mixture was stirred for 2 h at room temperature. The reaction was

monitored by TLC. After completion, the mixture was dried and concentrated. The residue was purified by flash chromatography (petroleum ether/ethyl acetate =10:1) to give products **4**.

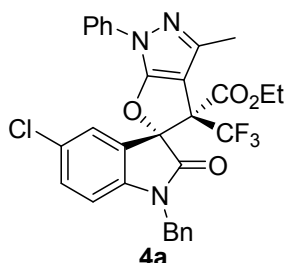

**ethyl-(4R,5R)-1'-benzyl-5'-chloro-3-methyl-2'-oxo-1-phenyl-4-(trifluoromethyl)-1,4-dihydrospiro[furo[2,3-c]pyrazole-5,3'-indoline]-4-carboxylate**, purified by flash chromatography on silica gel, eluting with petroleum ether/ethyl acetate 15/1 (v/v); white solid, mp 178-180 °C, 90.6 mg, 78% yield, 96% ee, >20:1 dr. HPLC (ID-H, *i*-PrOH/*n*-hexane = 20/80, flow rate = 1.0 mL/min,  $\lambda$  = 254 nm)  $t_R$  = 14.4 min (minor), 19.1 min (major).  $[\alpha]_D^{20}$  = -70 ( $c$  = 0.56 in  $\text{CH}_2\text{Cl}_2$ ).  $^1\text{H NMR}$  (500 MHz,  $\text{CDCl}_3$ )  $\delta$  7.70 – 7.63 (m, 3H), 7.42 – 7.37 (m, 6H), 7.35 – 7.30 (m, 2H), 7.25 – 7.19 (m, 1H), 6.69 (d,  $J$  = 8.5 Hz, 1H), 5.02 (d,  $J$  = 15.9 Hz, 1H), 4.74 (d,  $J$  = 15.9 Hz, 1H), 4.50 – 3.76 (m, 2H), 2.44 (s, 3H), 1.33 (t,  $J$  = 7.1 Hz, 3H);  $^{13}\text{C NMR}$  (126 MHz,  $\text{CDCl}_3$ )  $\delta$  171.5, 166.0, 158.8, 145.1, 143.0, 137.5, 134.3, 132.3, 129.2 ( $\times 2$ ), 129.0 ( $\times 2$ ), 128.8, 128.6, 128.0, 127.4 ( $\times 2$ ), 126.0, 123.7 ( $J$  = 286 Hz), 122.1, 118.5 ( $\times 2$ ), 111.2, 100.4, 98.2, 77.2, 63.6, 44.4, 13.8, 13.6 ppm. HRMS (ESI+) calcd for  $[\text{C}_{30}\text{H}_{23}\text{ClF}_3\text{N}_3\text{O}_4 + \text{Na}]^+$   $m/z$  604.1221, found 604.1224.

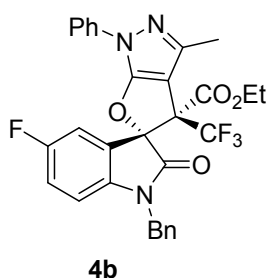

**ethyl-(4R,5R)-1'-benzyl-5'-fluoro-3-methyl-2'-oxo-1-phenyl-4-(trifluoromethyl)-1,4-dihydrospiro[furo[2,3-c]pyrazole-5,3'-indoline]-4-carboxylate**, purified by flash chromatography on silica gel, eluting with petroleum ether/ethyl acetate 15/1 (v/v); white solid, mp 150-152 °C, 74.6 mg, 66% yield, 92% ee, >20:1 dr. HPLC (ID-H, *i*-PrOH/*n*-hexane = 20/80, flow rate = 1.0 mL/min,  $\lambda$  = 254 nm)  $t_R$  = 12.1 min (minor), 14.3 min (major).  $[\alpha]_D^{20}$  = -6 ( $c$  = 0.57 in  $\text{CH}_2\text{Cl}_2$ ).  $^1\text{H NMR}$  (500 MHz,  $\text{CDCl}_3$ )  $\delta$  7.68 – 7.64 (m, 2H), 7.48 – 7.45 (m, 1H), 7.43 – 7.34 (m, 6H), 7.35 – 7.30 (m, 1H), 7.25 – 7.17 (m, 1H), 7.10 – 7.05 (m, 1H), 6.71 – 6.68 (m, 1H), 5.03 (d,  $J$  = 15.9 Hz, 1H), 4.73 (d,  $J$  = 15.9 Hz, 1H), 4.32 – 4.27 (m, 2H), 2.43 (s, 3H), 1.33 (t,  $J$  = 7.1 Hz, 3H);  $^{13}\text{C NMR}$  (126 MHz,  $\text{CDCl}_3$ )  $\delta$  171.7, 166.0, 159.1 (d,  $^1J_{\text{C-F}}$  = 241.9 Hz), 158.8, 145.0,

140.4 (d,  $^4J_{C-F} = 2.1$  Hz), 137.6, 134.4, 129.2 ( $\times 2$ ), 129.0 ( $\times 2$ ), 128.0, 127.4 ( $\times 2$ ), 125.9, 123.8 ( $J = 286$  Hz), 122.6 (d,  $^3J_{C-F} = 8.82$  Hz), 118.8 (d,  $^2J_{C-F} = 23.7$  Hz), 118.5 ( $\times 2$ ), 116.3 (d,  $^2J_{C-F} = 21.4$  Hz), 110.9 (d,  $^3J_{C-F} = 8.82$  Hz), 100.4, 98.3, 77.2, 63.6, 44.4, 13.8, 13.6 ppm. HRMS (ESI+) calcd for  $[C_{30}H_{23}F_4N_3O_4 + Na]^+$   $m/z$  588.1517, found 588.1521.

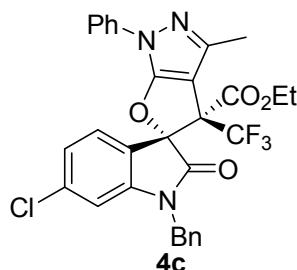

**ethyl-(4R,5R)-1'-benzyl-6'-chloro-3-methyl-2'-oxo-1-phenyl-4-(trifluoromethyl)-1,4-dihydrospiro[furo[2,3-c]pyrazole-5,3'-indoline]-4-carboxylate**, purified by flash chromatography on silica gel, eluting with petroleum ether/ethyl acetate 15/1 (v/v); white solid, mp 162-164 °C, 95.3 mg, 82% yield, 96% ee, >20:1 dr. HPLC (ID-H, *i*-PrOH/n-hexane = 10/90, flow rate = 1.0 mL/min,  $\lambda = 254$  nm)  $t_R = 5.8$  min (minor), 7.8 min (major).  $[\alpha]_D^{20} = -36$  (c = 0.53 in  $CH_2Cl_2$ ).  $^1H$  NMR (500 MHz,  $CDCl_3$ )  $\delta$  7.77 – 7.58 (m, 3H), 7.42 – 7.38 (m, 7H), 7.23 – 7.18 (m, 1H), 7.14 – 7.09 (m, 1H), 6.78 (d,  $J = 1.9$  Hz, 1H), 5.01 (d,  $J = 15.9$  Hz, 1H), 4.73 (d,  $J = 15.9$  Hz, 1H), 4.36 – 4.18 (m, 2H), 2.43 (s, 3H), 1.32 (t,  $J = 7.1$  Hz, 3H);  $^{13}C$  NMR (126 MHz,  $CDCl_3$ )  $\delta$  172.0, 166.0, 158.8, 145.8, 145.1, 138.5, 137.6, 134.2, 129.3, 129.2 ( $\times 2$ ), 129.0 ( $\times 2$ ), 128.1, 127.4 ( $\times 2$ ), 125.9, 123.8 ( $J = 286$  Hz), 123.3, 119.7, 118.4 ( $\times 2$ ), 110.8, 100.4, 98.0, 77.2, 63.6, 44.5, 13.8, 13.6 ppm. HRMS (ESI+) calcd for  $[C_{30}H_{23}ClF_3N_3O_4 + Na]^+$   $m/z$  604.1221, found 604.1229.

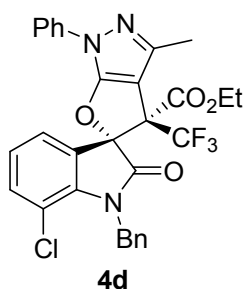

**ethyl-(4R,5R)-1'-benzyl-7'-chloro-3-methyl-2'-oxo-1-phenyl-4-(trifluoromethyl)-1,4-dihydrospiro[furo[2,3-c]pyrazole-5,3'-indoline]-4-carboxylate**, purified by flash chromatography on silica gel, eluting with petroleum ether/ethyl acetate 15/1 (v/v); white solid, mp 142-144 °C, 93.0 mg, 80% yield, 96% ee, >20:1 dr. HPLC (ID-H, *i*-PrOH/n-hexane = 20/80, flow rate = 1.0 mL/min,  $\lambda = 254$  nm)  $t_R = 16.1$  min (minor), 19.5 min (major).  $[\alpha]_D^{20} = -9$  (c = 0.56 in  $CH_2Cl_2$ ).  $^1H$  NMR (500 MHz,  $CDCl_3$ )  $\delta$  7.69 – 7.61 (m, 3H), 7.41 – 7.37 (m, 3H), 7.36 – 7.33 (m, 4H), 7.30 – 7.25 (m, 1H), 7.24 – 7.20 (m, 1H), 7.13 – 7.08 (m, 1H), 5.40 – 5.20 (m, 2H), 4.25 – 4.20 (m, 2H), 2.41 (s, 3H), 1.29 (t,  $J = 7.1$  Hz, 3H);  $^{13}C$  NMR (126 MHz,  $CDCl_3$ )  $\delta$  172.6, 165.9, 158.8, 145.1, 140.6, 137.6, 136.6, 135.0, 129.2 ( $\times 2$ ), 128.6 ( $\times 2$ ), 127.4, 127.0, 126.7 ( $\times 2$ ),

125.9, 124.2, 124.1, 123.8 ( $J = 283$  Hz), 118.4 ( $\times 2$ ), 116.2, 100.5, 97.7, 77.2, 63.6, 45.6, 13.8, 13.6 ppm. HRMS (ESI+) calcd for  $[C_{30}H_{23}ClF_3N_3O_4 + Na]^+$   $m/z$  604.1221, found 604.1224.

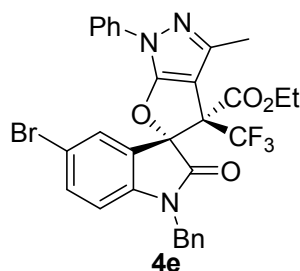

**ethyl-(4R,5R)-1'-benzyl-5'-bromo-3-methyl-2'-oxo-1-phenyl-4-(trifluoromethyl)-1,4-dihydrospiro[furo[2,3-c]pyrazole-5,3'-indoline]-4-carboxylate**, purified by flash chromatography on silica gel, eluting with petroleum ether/ethyl acetate 15/1 (v/v); white solid, mp182-184 °C, 86.3 mg, 69% yield, 94% ee, >20:1 dr. HPLC (ID-H, *i*-PrOH/n-hexane = 10/90, flow rate = 1.0 mL/min,  $\lambda = 254$  nm)  $t_R = 6.4$  min (minor), 9.0 min (major).  $[\alpha]_D^{20} = -18$  ( $c = 0.50$  in  $CH_2Cl_2$ ).  $^1H$  NMR (500 MHz,  $CDCl_3$ )  $\delta$  7.82 (d,  $J = 1.9$  Hz, 1H), 7.66 (d,  $J = 8.0$  Hz, 2H), 7.49 (dd,  $J = 8.5, 1.9$  Hz, 1H), 7.42 – 7.36 (m, 6H), 7.35 – 7.30 (m, 1H), 7.25 – 7.18 (m, 1H), 6.64 (d,  $J = 8.4$  Hz, 1H), 5.02 (d,  $J = 15.9$  Hz, 1H), 4.73 (d,  $J = 15.8$  Hz, 1H), 4.33 – 4.26 (m, 2H), 2.44 (s, 3H), 1.33 (t,  $J = 7.1$  Hz, 3H);  $^{13}C$  NMR (126 MHz,  $CDCl_3$ )  $\delta$  171.5, 166.0, 158.8, 145.0, 143.5, 137.5, 135.2, 134.2, 131.3, 129.2 ( $\times 2$ ), 129.0 ( $\times 2$ ), 128.0, 127.3 ( $\times 2$ ), 125.9, 123.7 ( $J = 283$  Hz), 123.1, 118.5 ( $\times 2$ ), 115.9, 111.7, 100.4, 98.1, 77.2, 63.6, 44.4, 13.8, 13.6 ppm. HRMS (ESI+) calcd for  $[C_{30}H_{23}BrF_3N_3O_4 + Na]^+$   $m/z$  648.0716, found 648.0718.

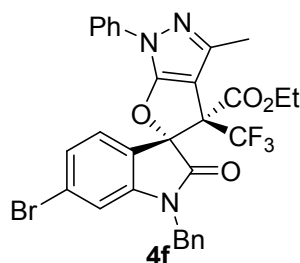

**ethyl-(4R,5R)-1'-benzyl-6'-bromo-3-methyl-2'-oxo-1-phenyl-4-(trifluoromethyl)-1,4-dihydrospiro[furo[2,3-c]pyrazole-5,3'-indoline]-4-carboxylate**, purified by flash chromatography on silica gel, eluting with petroleum ether/ethyl acetate 15/1 (v/v); white solid, mp195-197 °C, 98.8 mg, 79% yield, 97% ee, >20:1 dr. HPLC (ID-H, *i*-PrOH/n-hexane = 20/80, flow rate = 1.0 mL/min,  $\lambda = 254$  nm)  $t_R = 11.6$  min (minor), 14.6 min (major).  $[\alpha]_D^{20} = -3$  ( $c = 0.54$  in  $CH_2Cl_2$ ).  $^1H$  NMR (500 MHz,  $CDCl_3$ )  $\delta$  7.68 – 7.62 (m, 2H), 7.58 – 7.52 (m, 1H), 7.42 – 7.36 (m, 6H), 7.31 – 7.25 (m, 2H), 7.24 – 7.21 (m, 1H), 6.93 (d,  $J = 1.8$  Hz, 1H), 5.00 (d,  $J = 15.8$  Hz, 1H), 4.73 (d,  $J = 15.8$  Hz, 1H), 4.38 – 4.09 (m, 2H), 2.42 (s, 3H), 1.31 (t,  $J = 7.1$  Hz, 3H);  $^{13}C$  NMR (126 MHz,  $CDCl_3$ )  $\delta$  171.9, 166.0, 158.8, 145.8, 145.1, 137.6, 134.2, 129.5, 129.2 ( $\times 2$ ), 129.0 ( $\times 2$ ), 128.1, 127.4 ( $\times 2$ ), 126.6, 126.3, 125.9, 123.8 ( $J = 281$  Hz), 120.2, 118.4 ( $\times 2$ ), 113.6, 100.4, 98.1, 77.2, 63.6, 44.5, 13.8, 13.6 ppm. HRMS (ESI+) calcd for  $[C_{30}H_{23}BrF_3N_3O_4 + Na]^+$   $m/z$  648.0716, found 648.0719.

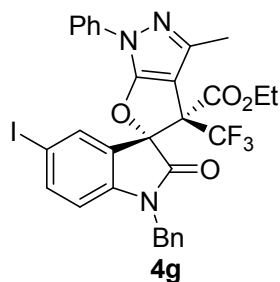

**ethyl-(4R,5R)-1'-benzyl-5'-iodo-3-methyl-2'-oxo-1-phenyl-4-(trifluoromethyl)-1,4-dihydrospiro[furo[2,3-c]pyrazole-5,3'-indoline]-4-carboxylate**, purified by flash chromatography on silica gel, eluting with petroleum ether/ethyl acetate 15/1 (v/v); white solid, mp181-183 °C, 91.5 mg, 68% yield, 92% ee, >20:1 dr. HPLC (ID-H, *i*-PrOH/n-hexane = 10/90, flow rate = 1.0 mL/min,  $\lambda = 254$  nm)  $t_R = 6.7$  min (minor), 9.7 min (major).  $[\alpha]_D^{20} = -27$  ( $c = 0.7$  in  $\text{CH}_2\text{Cl}_2$ ).  $^1\text{H NMR}$  (500 MHz,  $\text{CDCl}_3$ )  $\delta$  7.97 (s, 1H), 7.76 – 7.57 (m, 3H), 7.43 – 7.35 (m, 6H), 7.35 – 7.30 (m, 1H), 7.25 – 7.17 (m, 1H), 6.54 (d,  $J = 8.3$  Hz, 1H), 5.01 (d,  $J = 15.9$  Hz, 1H), 4.73 (d,  $J = 15.9$  Hz, 1H), 4.33 – 4.15 (m, 2H), 2.44 (s, 3H), 1.32 (t,  $J = 7.1$  Hz, 3H);  $^{13}\text{C NMR}$  (126 MHz,  $\text{CDCl}_3$ )  $\delta$  171.2, 166.0, 158.8, 145.0, 144.1, 141.1, 137.5, 136.8, 134.2, 129.2 ( $\times 2$ ), 129.0 ( $\times 2$ ), 128.0, 127.3 ( $\times 2$ ), 126.0, 123.7 ( $J = 286$  Hz), 123.4, 118.5 ( $\times 2$ ), 112.2, 100.4, 97.9, 85.5, 77.3, 63.6, 44.3, 13.8, 13.6 ppm. HRMS (ESI+) calcd for  $[\text{C}_{30}\text{H}_{23}\text{F}_3\text{IN}_3\text{O}_4 + \text{Na}]^+$   $m/z$  696.0578, found 696.0578.

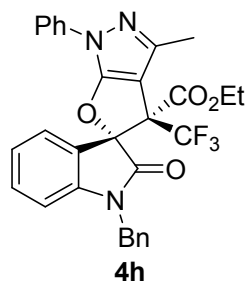

**ethyl-(4R,5R)-1'-benzyl-3-methyl-2'-oxo-1-phenyl-4-(trifluoromethyl)-1,4-dihydrospiro[furo[2,3-c]pyrazole-5,3'-indoline]-4-carboxylate**, purified by flash chromatography on silica gel, eluting with petroleum ether/ethyl acetate 15/1 (v/v); white solid, mp128-130 °C, 67.8 mg, 62% yield, 94% ee, >20:1 dr. HPLC (IF-H, *i*-PrOH/n-hexane = 7/93, flow rate = 0.7 mL/min,  $\lambda = 254$  nm)  $t_R = 13.8$  min (minor), 17.4 min (major).  $[\alpha]_D^{20} = -30$  ( $c = 0.56$  in  $\text{CH}_2\text{Cl}_2$ ).  $^1\text{H NMR}$  (500 MHz,  $\text{CDCl}_3$ )  $\delta$  7.76 – 7.64 (m, 3H), 7.45 – 7.29 (m, 8H), 7.24 – 7.09 (m, 2H), 6.79 (d,  $J = 8.0$  Hz, 1H), 5.04 (d,  $J = 15.8$  Hz, 1H), 4.76 (d,  $J = 15.9$  Hz, 1H), 4.42 – 4.21 (m, 2H), 2.44 (s, 3H), 1.32 (t,  $J = 7.1$  Hz, 3H);  $^{13}\text{C NMR}$  (126 MHz,  $\text{CDCl}_3$ )  $\delta$  171.9, 166.1, 159.0, 155.1, 145.1, 144.4, 137.7, 134.8, 132.3, 129.2 ( $\times 2$ ), 128.9 ( $\times 2$ ), 128.2, 127.8, 127.8, 127.4 ( $\times 2$ ), 124.4 ( $J = 283$  Hz), 123.2, 121.3, 118.4 ( $\times 2$ ), 110.1, 77.2, 63.4, 44.3, 29.7, 13.8, 13.6 ppm. HRMS (ESI+) calcd for  $[\text{C}_{30}\text{H}_{24}\text{F}_3\text{N}_3\text{O}_4 + \text{Na}]^+$   $m/z$  570.1611, found 570.1616.



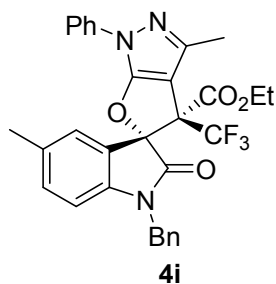

***ethyl-(4R,5R)-1'-benzyl-3,5'-dimethyl-2'-oxo-1-phenyl-4-(trifluoromethyl)-1,4-dihydrospiro[furo[2,3-c]pyrazole-5,3'-indoline]-4-carboxylate***, purified by flash chromatography on silica gel, eluting with petroleum ether/ethyl acetate 15/1 (v/v); white solid, mp194-196 °C, 56.1 mg, 50% yield, 90% ee, >20:1 dr. HPLC (IE-H, *i*-PrOH/n-hexane = 10/90, flow rate = 1.0 mL/min,  $\lambda = 254$  nm)  $t_R = 8.2$  min (minor), 11.2 min (major).  $[\alpha]_D^{20} = -27$  ( $c = 0.53$  in  $\text{CH}_2\text{Cl}_2$ ).  $^1\text{H NMR}$  (500 MHz,  $\text{CDCl}_3$ )  $\delta$  7.70 – 7.67 (m, 2H), 7.53 (s, 1H), 7.43 – 7.35 (m, 6H), 7.33 – 7.29 (m, 1H), 7.23 – 7.14 (m, 2H), 6.67 (d,  $J = 8.1$  Hz, 1H), 5.01 (d,  $J = 15.8$  Hz, 1H), 4.74 (d,  $J = 15.8$  Hz, 1H), 4.32 – 4.22 (m, 2H), 2.45 (s, 3H), 2.35 (s, 3H), 1.31 (t,  $J = 7.1$  Hz, 3H);  $^{13}\text{C NMR}$  (126 MHz,  $\text{CDCl}_3$ )  $\delta$  171.8, 166.1, 159.1, 145.1, 142.0, 137.7, 134.9, 132.9, 132.6, 129.2 ( $\times 2$ ), 128.9, 128.8 ( $\times 2$ ), 127.8, 127.4 ( $\times 2$ ), 125.8, 123.9 ( $J = 286$  Hz), 121.3, 118.4 ( $\times 2$ ), 109.9, 100.6, 99.0, 77.2, 63.4, 44.3, 21.1, 13.8, 13.6 ppm. HRMS (ESI+) calcd for  $[\text{C}_{31}\text{H}_{26}\text{F}_3\text{N}_3\text{O}_4 + \text{Na}]^+$   $m/z$  584.1768, found 584.1773.

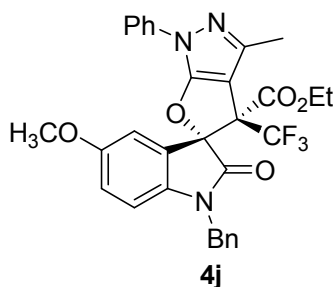

***ethyl-(4R,5R)-1'-benzyl-5'-methoxy-3-methyl-2'-oxo-1-phenyl-4-(trifluoromethyl)-1,4-dihydrospiro[furo[2,3-c]pyrazole-5,3'-indoline]-4-carboxylate***, purified by flash chromatography on silica gel, eluting with petroleum ether/ethyl acetate 15/1 (v/v); white solid, mp175-177 °C, 81.9 mg, 71% yield, 88% ee, >20:1 dr. HPLC (ID-H, *i*-PrOH/n-hexane = 20/80, flow rate = 1.0 mL/min,  $\lambda = 260$  nm)  $t_R = 17.6$  min (minor), 24.4 min (major).  $[\alpha]_D^{20} = -58$  ( $c = 0.64$  in  $\text{CH}_2\text{Cl}_2$ ).  $^1\text{H NMR}$  (500 MHz,  $\text{CDCl}_3$ )  $\delta$  7.68 (d,  $J = 8.0$  Hz, 2H), 7.43 – 7.34 (m, 6H), 7.33 – 7.29 (m, 2H), 7.25 – 7.17 (m, 1H), 6.93 – 6.85 (m, 1H), 6.66 (d,  $J = 8.7$  Hz, 1H), 5.00 (d,  $J = 15.8$  Hz, 1H), 4.73 (d,  $J = 15.8$  Hz, 1H), 4.32-4.14 (m, 2H), 3.79 (s, 3H), 2.44 (s, 3H), 1.32 (t,  $J = 7.1$  Hz, 3H);  $^{13}\text{C NMR}$  (126 MHz,  $\text{CDCl}_3$ )  $\delta$  171.6, 166.0, 159.0, 156.1, 145.1, 137.7, 137.6, 134.8, 129.2 ( $\times 2$ ), 128.9 ( $\times 2$ ), 127.8, 127.4 ( $\times 2$ ), 125.8, 123.8 ( $J = 279$  Hz), 122.3, 118.5 ( $\times 2$ ), 117.2, 115.2, 110.6, 100.6, 99.0, 77.2, 63.5, 55.9, 44.3, 13.8, 13.6 ppm. HRMS (ESI+) calcd for  $[\text{C}_{31}\text{H}_{26}\text{F}_3\text{N}_3\text{O}_5 + \text{Na}]^+$   $m/z$  600.1717, found 600.1720.

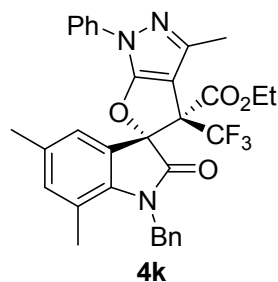

**ethyl-(4R,5R)-1'-benzyl-3,5',7'-trimethyl-2'-oxo-1-phenyl-4-(trifluoromethyl)-1,4-dihydrospiro[furo[2,3-c]pyrazole-5,3'-indoline]-4-carboxylate**, purified by flash chromatography on silica gel, eluting with petroleum ether/ethyl acetate 15/1 (v/v); white solid, mp 178-180 °C, 70.2 mg, 61% yield, 97% ee, >20:1 dr. HPLC (ID-H, *i*-PrOH/n-hexane = 20/80, flow rate = 1.0 mL/min,  $\lambda = 254$  nm)  $t_R = 18.8$  min (minor), 22.5 min (major).  $[\alpha]_D^{20} = -30$  ( $c = 0.52$  in  $\text{CH}_2\text{Cl}_2$ ).  **$^1\text{H NMR}$**  (500 MHz,  $\text{CDCl}_3$ )  $\delta$  7.71 – 7.64 (m, 2H), 7.43 – 7.32 (m, 6H), 7.32 – 7.24 (m, 2H), 7.20 (t,  $J = 7.5$  Hz, 1H), 6.97 (s, 1H), 5.31 – 4.98 (m, 2H), 4.32 – 4.20 (m, 2H), 2.42 (s, 3H), 2.32 (s, 3H), 2.24 (s, 3H), 1.31 (t,  $J = 7.2$  Hz, 3H);  **$^{13}\text{C NMR}$**  (126 MHz,  $\text{CDCl}_3$ )  $\delta$  173.2, 166.5, 159.3, 145.3, 140.2, 138.0, 137.1( $\times 2$ ), 133.1, 129.4( $\times 2$ ), 129.1( $\times 2$ ), 127.5, 127.0, 126.1, 125.9( $\times 2$ ), 124.1( $J = 286$  Hz), 122.4, 120.5, 118.6( $\times 2$ ), 100.9, 98.9, 77.5, 63.6, 45.9, 21.0, 19.0, 14.0, 13.8 ppm. HRMS (ESI+) calcd for  $[\text{C}_{32}\text{H}_{28}\text{F}_3\text{N}_3\text{O}_6 + \text{Na}]^+$   $m/z$  614.1276, found 614.1274.

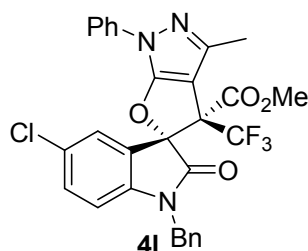

**methyl-(4R,5R)-1'-benzyl-5'-chloro-3-methyl-2'-oxo-1-phenyl-4-(trifluoromethyl)-1,4-dihydrospiro[furo[2,3-c]pyrazole-5,3'-indoline]-4-carboxylate**, purified by flash chromatography on silica gel, eluting with petroleum ether/ethyl acetate 15/1 (v/v); white solid, mp 190-192 °C, 87.3 mg, 77% yield, 93% ee, >20:1 dr. HPLC (ID-H, *i*-PrOH/n-hexane = 20/80, flow rate = 1.0 mL/min,  $\lambda = 254$  nm)  $t_R = 17.9$  min (minor), 33.1 min (major).  $[\alpha]_D^{20} = -6$  ( $c = 0.50$  in  $\text{CH}_2\text{Cl}_2$ ).  **$^1\text{H NMR}$**  (500 MHz,  $\text{CDCl}_3$ )  $\delta$  7.71 – 7.60 (m, 3H), 7.42 – 7.31 (m, 8H), 7.25 – 7.19 (m, 1H), 6.72 (d,  $J = 8.5$  Hz, 1H), 5.05 (d,  $J = 15.8$  Hz, 1H), 4.71 (d,  $J = 15.9$  Hz, 1H), 3.77 (s, 3H), 2.42 (s, 3H);  **$^{13}\text{C NMR}$**  (126 MHz,  $\text{CDCl}_3$ )  $\delta$  171.5, 166.3, 158.8, 145.1, 142.9, 137.5, 134.3, 132.3, 129.2 ( $\times 2$ ), 129.0 ( $\times 2$ ), 128.9, 128.6, 128.1, 127.4 ( $\times 2$ ), 125.9, 123.8 ( $J = 279$  Hz), 122.8, 118.5 ( $\times 2$ ), 111.2, 100.3, 98.2, 77.2, 53.9, 44.4, 13.5 ppm. HRMS (ESI+) calcd for  $[\text{C}_{29}\text{H}_{21}\text{ClF}_3\text{N}_3\text{O}_4 + \text{Na}]^+$   $m/z$  590.1065, found 590.1061.

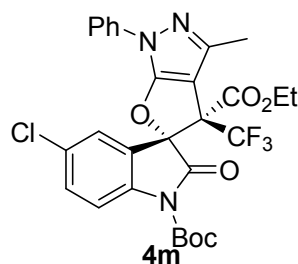

**1'-(tert-butyl)4-ethyl-(4R,5R)-5'-chloro-3-methyl-2'-oxo-1-phenyl-4-(trifluoromethyl)-1,4-dihydrospiro[furo[2,3-c]pyrazole-5,3'-indoline]-1',4-dicarboxylate**, purified by flash chromatography on silica gel, eluting with petroleum ether/ethyl acetate 15/1 (v/v); white solid, mp165-167 °C, 79.2 mg, 67% yield, 93% ee, >20:1 dr. HPLC (IC-H, *i*-PrOH/n-hexane = 20/80, flow rate = 1.0 mL/min,  $\lambda$  = 254 nm)  $t_R$  = 9.5 min (minor), 10.9 min (major).  $[\alpha]_D^{20}$  = -21 ( $c$  = 0.50 in  $\text{CH}_2\text{Cl}_2$ ).  $^1\text{H NMR}$  (500 MHz,  $\text{CDCl}_3$ )  $\delta$  8.02 (d,  $J$  = 8.9 Hz, 1H), 7.74 – 7.69 (m, 1H), 7.68 – 7.61 (m, 2H), 7.56 – 7.50 (m, 1H), 7.42 – 7.34 (m, 2H), 7.24 – 7.17 (m, 1H), 4.41 – 4.16 (m, 2H), 2.42 (s, 3H), 1.61 (s, 9H), 1.31 (t,  $J$  = 7.1 Hz, 3H);  $^{13}\text{C NMR}$  (126 MHz,  $\text{CDCl}_3$ )  $\delta$  169.6, 165.5, 158.8, 148.3, 145.1, 139.8, 137.4, 132.7, 130.5, 129.2 ( $\times 2$ ), 128.0, 126.0, 123.4 ( $J$  = 286 Hz), 121.7, 118.5 ( $\times 2$ ), 116.9, 99.9, 97.6, 85.5, 77.2, 63.7, 28.0 ( $\times 3$ ), 13.6, 13.5 ppm. HRMS (ESI+) calcd for  $[\text{C}_{28}\text{H}_{25}\text{ClF}_3\text{N}_3\text{O}_6 + \text{Na}]^+$   $m/z$  614.1276, found 614.1274.

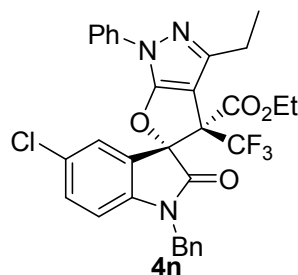

**ethyl-(4R,5R)-1'-benzyl-5'-chloro-3-ethyl-2'-oxo-1-phenyl-4-(trifluoromethyl)-1,4-dihydrospiro[furo[2,3-c]pyrazole-5,3'-indoline]-4-carboxylate**, purified by flash chromatography on silica gel, eluting with petroleum ether/ethyl acetate 15/1 (v/v); white solid, mp151-153 °C, 65.5 mg, 55% yield, 95% ee, >20:1 dr. HPLC (IB-H, *i*-PrOH/n-hexane = 20/80, flow rate = 1.0 mL/min,  $\lambda$  = 254 nm)  $t_R$  = 11.9 min (major), 14.4 min (minor).  $[\alpha]_D^{20}$  = -44 ( $c$  = 0.51 in  $\text{CH}_2\text{Cl}_2$ ).  $^1\text{H NMR}$  (500 MHz,  $\text{CDCl}_3$ )  $\delta$  7.72 – 7.63 (m, 3H), 7.44 – 7.35 (m, 6H), 7.36 – 7.31 (m, 2H), 7.27 – 7.18 (m, 1H), 6.69 (d,  $J$  = 8.5 Hz, 1H), 5.02 (d,  $J$  = 15.9 Hz, 1H), 4.74 (d,  $J$  = 15.9 Hz, 1H), 4.28 (dd,  $J$  = 10.6, 7.1 Hz, 2H), 2.87 – 2.79 (m, 2H), 1.40 (t,  $J$  = 7.6 Hz, 3H), 1.31 (t,  $J$  = 7.1 Hz, 3H);  $^{13}\text{C NMR}$  (126 MHz,  $\text{CDCl}_3$ )  $\delta$  171.6, 166.0, 158.6, 149.9, 142.9, 137.7, 134.3, 132.2, 129.2 ( $\times 2$ ), 129.0 ( $\times 2$ ), 128.8, 128.8, 128.0, 127.4 ( $\times 2$ ), 125.8, 123.9 ( $J$  = 285 Hz), 123.0, 118.6 ( $\times 2$ ), 111.1, 99.6, 98.1, 77.2, 63.6, 44.4, 21.1, 13.8, 12.5 ppm. HRMS (ESI+) calcd for  $[\text{C}_{31}\text{H}_{25}\text{ClF}_3\text{N}_3\text{O}_4 + \text{Na}]^+$   $m/z$  618.1378, found 618.1374.

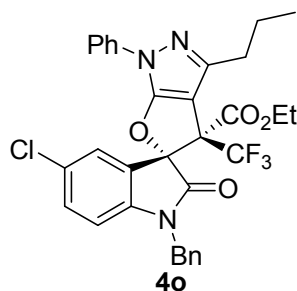

**ethyl-(4R,5R)-1'-benzyl-5'-chloro-2'-oxo-1-phenyl-3-propyl-4-(trifluoromethyl)-1,4-dihydrospiro[furo[2,3-c]pyrazole-5,3'-indoline]-4-carboxylate**, purified by flash chromatography on silica gel, eluting with petroleum ether/ethyl acetate 15/1 (v/v); white solid, mp157-159 °C, 95.0 mg, 78% yield, 95% ee, >20:1 dr. HPLC (IB-H, *i*-PrOH/n-hexane = 20/80, flow rate = 1.0 mL/min,  $\lambda = 254$  nm)  $t_R = 12.5$  min (major), 15.2 min (minor).  $[\alpha]_D^{20} = -11$  ( $c = 0.51$  in  $\text{CH}_2\text{Cl}_2$ ).  $^1\text{H NMR}$  (500 MHz,  $\text{CDCl}_3$ )  $\delta$  7.69 – 7.63 (m, 3H), 7.42 – 7.30 (m, 8H), 7.21 (t,  $J = 7.4$  Hz, 1H), 6.68 (d,  $J = 8.5$  Hz, 1H), 5.02 (d,  $J = 15.8$  Hz, 1H), 4.73 (d,  $J = 15.8$  Hz, 1H), 4.28 (t,  $J = 7.2$  Hz, 2H), 2.85 – 2.65 (m, 2H), 1.87 (q,  $J = 7.6$  Hz, 2H), 1.31 (t,  $J = 7.1$  Hz, 3H), 1.08 (t,  $J = 7.3$  Hz, 3H);  $^{13}\text{C NMR}$  (126 MHz,  $\text{CDCl}_3$ )  $\delta$  171.7, 166.1, 158.8, 149.0, 143.1, 137.9, 134.5, 132.4, 129.4( $\times 2$ ), 129.2( $\times 2$ ), 128.9, 128.7, 128.2, 127.5( $\times 2$ ), 126.0, 123.9( $J = 286$  Hz), 123.2, 118.7( $\times 2$ ), 111.3, 100.1, 98.3, 77.5, 63.7, 44.6, 30.1, 21.8, 14.4, 14.0 ppm. HRMS (ESI+) calcd for  $[\text{C}_{32}\text{H}_{27}\text{ClF}_3\text{N}_3\text{O}_4 + \text{Na}]^+$   $m/z$  632.1534, found 632.1529.

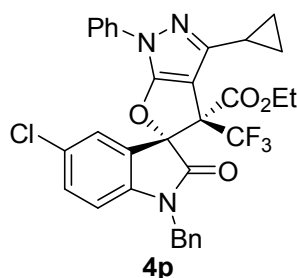

**ethyl-(4R,5R)-1'-benzyl-5'-chloro-3-cyclopropyl-2'-oxo-1-phenyl-4-(trifluoromethyl)-1,4-dihydrospiro[furo[2,3-c]pyrazole-5,3'-indoline]-4-carboxylate**, purified by flash chromatography on silica gel, eluting with petroleum ether/ethyl acetate 15/1 (v/v); white solid, mp164-166 °C, 99.5 mg, 82% yield, 92% ee, >20:1 dr. HPLC (IB-H, *i*-PrOH/n-hexane = 20/80, flow rate = 1.0 mL/min,  $\lambda = 254$  nm)  $t_R = 12.9$  min (major), 15.3 min (minor).  $[\alpha]_D^{20} = -43$  ( $c = 0.54$  in  $\text{CH}_2\text{Cl}_2$ ).  $^1\text{H NMR}$  (500 MHz,  $\text{CDCl}_3$ )  $\delta$  7.69 (s, 1H), 7.64 – 7.61 (m, 2H), 7.42 – 7.31 (m, 8H), 7.22 – 7.16 (m, 1H), 6.69 (d,  $J = 8.5$  Hz, 1H), 5.03 (d,  $J = 15.9$  Hz, 1H), 4.74 (d,  $J = 15.9$  Hz, 1H), 4.35 – 4.26 (m, 2H), 2.14 – 2.05 (m, 1H), 1.32 (t,  $J = 7.1$  Hz, 3H), 1.24 – 1.17 (m, 1H), 1.11 – 1.05 (m, 1H), 0.98 – 0.90 (m, 2H);  $^{13}\text{C NMR}$  (126 MHz,  $\text{CDCl}_3$ )  $\delta$  171.6, 166.1, 158.5, 149.7, 143.0, 137.7, 134.3, 132.2, 129.1 ( $\times 2$ ), 129.0 ( $\times 2$ ), 128.8, 128.6, 128.0, 127.4 ( $\times 2$ ), 125.7, 123.8 ( $J = 286$  Hz), 123.0, 118.4 ( $\times 2$ ), 111.2, 100.6, 98.1, 77.2, 63.5, 44.4, 13.8, 8.5, 8.0, 7.7 ppm. HRMS (ESI+) calcd for  $[\text{C}_{32}\text{H}_{25}\text{ClF}_3\text{N}_3\text{O}_4 + \text{Na}]^+$   $m/z$  630.1378, found 630.1378.

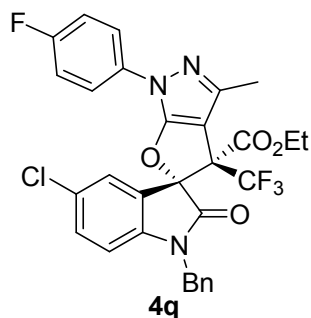

***ethyl-(4R,5R)-1'-benzyl-5'-chloro-1-(4-fluorophenyl)-3-methyl-2'-oxo-4-(trifluoromethyl)-1,4-dihydrospiro[furo[2,3-c]pyrazole-5,3'-indoline]-4-carboxylate***, purified by flash chromatography on silica gel, eluting with petroleum ether/ethyl acetate 15/1 (v/v); white solid, mp174-176 °C, 110.2 mg, 92% yield, 91% ee, >20:1 dr. HPLC (IB-H, *i*-PrOH/n-hexane = 20/80, flow rate = 1.0 mL/min,  $\lambda$  = 254 nm)  $t_R$  = 17.9 min (major), 24.3 min (minor).  $[\alpha]_D^{20}$  = -50 ( $c$  = 0.53 in  $\text{CH}_2\text{Cl}_2$ ).  $^1\text{H NMR}$  (500 MHz,  $\text{CDCl}_3$ )  $\delta$  7.68 (d,  $J$  = 2.0 Hz, 1H), 7.63 – 7.58 (m, 2H), 7.40 – 7.29 (m, 6H), 7.13-7.04 (m, 2H), 6.69 (d,  $J$  = 8.5 Hz, 1H), 5.03 (d,  $J$  = 15.8 Hz, 1H), 4.73 (d,  $J$  = 15.9 Hz, 1H), 4.37 – 4.21 (m, 2H), 2.41 (s, 3H), 1.32 (t,  $J$  = 7.1 Hz, 3H);  $^{13}\text{C NMR}$  (126 MHz,  $\text{CDCl}_3$ )  $\delta$  171.5, 165.9, 160.6 (d,  $^1J_{\text{C-F}}$  = 245.6 Hz), 158.6, 145.1, 143.0, 134.2, 133.8 (d,  $^4J_{\text{C-F}}$  = 2.6 Hz), 132.3, 129.0 ( $\times 2$ ), 128.8, 128.6, 128.1, 127.3 ( $\times 2$ ), 123.8 ( $J$  = 286 Hz), 122.6, 120.3 (d,  $^3J_{\text{C-F}}$  = 8.2 Hz) ( $\times 2$ ), 116.0 (d,  $^2J_{\text{C-F}}$  = 22.7 Hz) ( $\times 2$ ), 111.2, 100.4, 98.2, 77.2, 63.7, 44.4, 13.8, 13.6 ppm. HRMS (ESI+) calcd for  $[\text{C}_{30}\text{H}_{22}\text{ClF}_4\text{N}_3\text{O}_4 + \text{Na}]^+$   $m/z$  622.1127, found 622.1123.

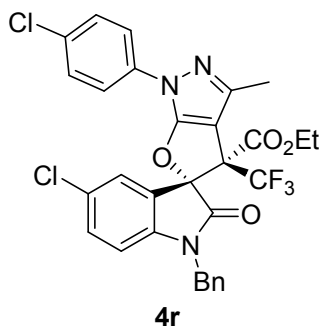

***ethyl-(4R,5R)-1'-benzyl-5'-chloro-1-(4-chlorophenyl)-3-methyl-2'-oxo-4-(trifluoromethyl)-1,4-dihydrospiro[furo[2,3-c]pyrazole-5,3'-indoline]-4-carboxylate***, purified by flash chromatography on silica gel, eluting with petroleum ether/ethyl acetate 15/1 (v/v); white solid, mp154-156 °C, 102.1 mg, 83% yield, 88% ee, >20:1 dr. HPLC (IB-H, *i*-PrOH/n-hexane = 20/80, flow rate = 1.0 mL/min,  $\lambda$  = 268 nm)  $t_R$  = 13.6 min (major), 18.6 min (minor).  $[\alpha]_D^{20}$  = -45 ( $c$  = 0.51 in  $\text{CH}_2\text{Cl}_2$ ).  $^1\text{H NMR}$  (500 MHz,  $\text{CDCl}_3$ )  $\delta$  7.68 (d,  $J$  = 2.0 Hz, 1H), 7.60 (d,  $J$  = 8.6 Hz, 2H), 7.40 – 7.30 (m, 8H), 6.70 (d,  $J$  = 8.4 Hz, 1H), 5.02 (d,  $J$  = 15.8 Hz, 1H), 4.73 (d,  $J$  = 15.9 Hz, 1H), 4.34 – 4.23 (m, 2H), 2.42 (s, 3H), 1.32 (t,  $J$  = 7.1 Hz, 3H);  $^{13}\text{C NMR}$  (126 MHz,  $\text{CDCl}_3$ )  $\delta$  171.5, 165.8, 158.7, 145.4, 143.0, 136.0, 134.2, 132.4, 131.3, 129.3 ( $\times 2$ ), 129.0 ( $\times 2$ ), 128.9, 128.6, 128.1, 127.3 ( $\times 2$ ), 123.7 ( $J$  = 286 Hz), 122.6, 119.6 ( $\times 2$ ), 111.3, 100.7, 98.3, 77.2, 63.7, 44.4, 13.8, 13.6 ppm. HRMS (ESI+) calcd for  $[\text{C}_{30}\text{H}_{22}\text{Cl}_2\text{F}_3\text{N}_3\text{O}_4 + \text{Na}]^+$   $m/z$  638.0832, found 638.0827.

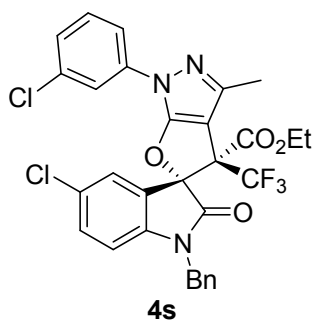

**ethyl-(4R,5R)-1'-benzyl-5'-chloro-1-(3-chlorophenyl)-3-methyl-2'-oxo-4-(trifluoromethyl)-1,4-dihydrospiro[furo[2,3-c]pyrazole-5,3'-indoline]-4-carboxylate**, purified by flash chromatography on silica gel, eluting with petroleum ether/ethyl acetate 15/1 (v/v); white solid, mp 163-165 °C, 92.3 mg, 75% yield, 89% ee, >20:1 dr. HPLC (IB-H, *i*-PrOH/n-hexane = 20/80, flow rate = 1.0 mL/min,  $\lambda = 254$  nm)  $t_R = 15.6$  min (major), 19.3 min (minor).  $[\alpha]_D^{20} = -16$  ( $c = 0.58$  in  $\text{CH}_2\text{Cl}_2$ ).  $^1\text{H NMR}$  (500 MHz,  $\text{CDCl}_3$ )  $\delta$  7.69 (d,  $J = 7.9$  Hz, 2H), 7.57 (s, 1H), 7.41 – 7.31 (m, 7H), 7.19 (d,  $J = 7.5$  Hz, 1H), 6.70 (d,  $J = 8.5$  Hz, 1H), 5.04 (d,  $J = 15.9$  Hz, 1H), 4.74 (d,  $J = 15.8$  Hz, 1H), 4.34 – 4.07 (m, 2H), 2.43 (s, 3H), 1.32 (t,  $J = 7.1$  Hz, 3H);  $^{13}\text{C NMR}$  (126 MHz,  $\text{CDCl}_3$ )  $\delta$  171.7, 166.0, 159.1, 145.8, 143.2, 138.7, 135.3, 134.4, 132.6, 130.5, 129.2( $\times 2$ ), 129.1, 128.9, 128.3, 127.5( $\times 2$ ), 126.1, 123.9( $J = 286$  Hz), 122.8, 118.7, 116.5, 111.5, 101.0, 98.6, 77.5, 63.9, 44.7, 14.0, 13.8 ppm. HRMS (ESI+) calcd for  $[\text{C}_{30}\text{H}_{22}\text{Cl}_2\text{F}_3\text{N}_3\text{O}_4 + \text{Na}]^+$   $m/z$  638.0832, found 638.0832.

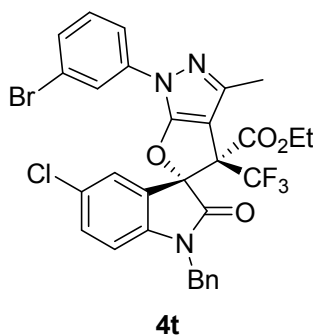

**ethyl-(4R,5R)-1'-benzyl-1-(3-bromophenyl)-5'-chloro-3-methyl-2'-oxo-4-(trifluoromethyl)-1,4-dihydrospiro[furo[2,3-c]pyrazole-5,3'-indoline]-4-carboxylate**, purified by flash chromatography on silica gel, eluting with petroleum ether/ethyl acetate 15/1 (v/v); white solid, mp 177-179 °C, 104.1 mg, 79% yield, 91% ee, >20:1 dr. HPLC (IB-H, *i*-PrOH/n-hexane = 20/80, flow rate = 1.0 mL/min,  $\lambda = 254$  nm)  $t_R = 13.8$  min (major), 17.6 min (minor).  $[\alpha]_D^{20} = -41$  ( $c = 0.54$  in  $\text{CH}_2\text{Cl}_2$ ).  $^1\text{H NMR}$  (500 MHz,  $\text{CDCl}_3$ )  $\delta$  7.88 – 7.82 (m, 1H), 7.72 – 7.66 (m, 1H), 7.63 – 7.58 (m, 1H), 7.42 – 7.30 (m, 7H), 7.25 (t,  $J = 8.1$  Hz, 1H), 6.70 (d,  $J = 8.5$  Hz, 1H), 5.04 (d,  $J = 15.8$  Hz, 1H), 4.74 (d,  $J = 15.9$  Hz, 1H), 4.37 – 4.21 (m, 2H), 2.42 (s, 3H), 1.32 (t,  $J = 7.1$  Hz, 3H);  $^{13}\text{C NMR}$  (126 MHz,  $\text{CDCl}_3$ )  $\delta$  171.5, 165.8, 158.8, 145.6, 143.0, 138.6, 134.2, 132.4, 130.5, 129.0 ( $\times 2$ ), 128.9, 128.9, 128.6, 128.1, 127.3 ( $\times 2$ ), 123.9 ( $J = 273$  Hz), 122.9, 122.5, 121.3, 116.8, 111.3, 100.8, 98.4, 77.2, 63.7, 44.4, 13.8, 13.6 ppm. HRMS (ESI+) calcd for  $[\text{C}_{30}\text{H}_{22}\text{BrClF}_3\text{N}_3\text{O}_4 + \text{Na}]^+$   $m/z$  682.0327, found 682.0325.

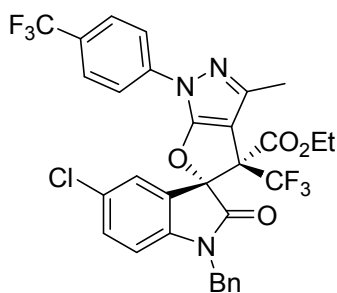

4u

**ethyl-(4R,5R)-1'-benzyl-5'-chloro-3-methyl-2'-oxo-4-(trifluoromethyl)-1-(4-(trifluoromethyl)phenyl)-1,4-dihydrospiro[furo[2,3-c]pyrazole-5,3'-indoline]-4-carboxylate**, purified by flash chromatography on silica gel, eluting with petroleum ether/ethyl acetate 15/1 (v/v); white solid, mp147-149 °C, 92.2 mg, 71% yield, 90% ee, >20:1 dr. HPLC (IB-H, *i*-PrOH/n-hexane = 20/80, flow rate = 1.0 mL/min,  $l = 254$  nm)  $t_R = 14.6$  min (major), 19.7 min (minor).  $[\alpha]_D^{20} = -34$  ( $c = 0.50$  in  $\text{CH}_2\text{Cl}_2$ ).  $^1\text{H NMR}$  (500 MHz,  $\text{CDCl}_3$ )  $\delta$  7.79 (d,  $J = 8.4$  Hz, 2H), 7.71 – 7.60 (m, 3H), 7.41 – 7.30 (m, 6H), 6.71 (d,  $J = 8.5$  Hz, 1H), 5.02 (d,  $J = 15.8$  Hz, 1H), 4.75 (d,  $J = 15.9$  Hz, 1H), 4.39 – 4.23 (m, 2H), 2.44 (s, 3H), 1.33 (t,  $J = 7.1$  Hz, 3H);  $^{13}\text{C NMR}$  (126 MHz,  $\text{CDCl}_3$ )  $\delta$  171.6, 166.0, 159.4, 146.3, 143.2, 140.4, 134.4, 132.7, 129.2( $\times 2$ ), 129.1, 128.8(q,  $^3J_{\text{CF}_3} = 5.0$  Hz), 128.3, 127.9(q,  $^2J_{\text{CF}_3} = 32.8$  Hz), 127.66( $\times 2$ ), 127.4, 126.7(q,  $^3J_{\text{CF}_3} = 3.8$  Hz), 124.1(q,  $^1J_{\text{CF}_3} = 273$  Hz), 123.9( $J = 286$  Hz), 122.7, 118.3( $\times 2$ ), 111.5, 101.4, 98.7, 77.5, 64.0, 44.7, 14.0, 13.8 ppm. HRMS (ESI+) calcd for  $[\text{C}_{31}\text{H}_{22}\text{ClF}_6\text{N}_3\text{O}_4 + \text{Na}]^+$   $m/z$  672.1095, found 672.1099.

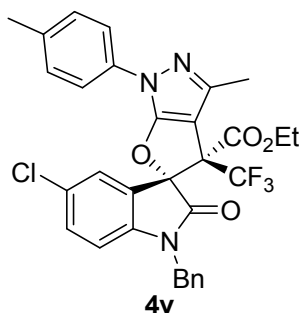

4v

**ethyl-(4R,5R)-1'-benzyl-5'-chloro-3-methyl-2'-oxo-1-(*p*-tolyl)-4-(trifluoromethyl)-1,4-dihydrospiro[furo[2,3-c]pyrazole-5,3'-indoline]-4-carboxylate**, purified by flash chromatography on silica gel, eluting with petroleum ether/ethyl acetate 15/1 (v/v); white solid, mp150-152°C, 77.4 mg, 65% yield, 94% ee, >20:1 dr. HPLC (IB-H, *i*-PrOH/n-hexane = 20/80, flow rate = 1.0 mL/min,  $l = 280$  nm)  $t_R = 14.1$  min (major), 17.6 min (minor).  $[\alpha]_D^{20} = -22$  ( $c = 0.53$  in  $\text{CH}_2\text{Cl}_2$ ).  $^1\text{H NMR}$  (500 MHz,  $\text{CDCl}_3$ )  $\delta$  7.67 (d,  $J = 2.0$  Hz, 1H), 7.52 (d,  $J = 8.2$  Hz, 2H), 7.41 – 7.30 (m, 6H), 7.18 (d,  $J = 7.9$  Hz, 2H), 6.68 (d,  $J = 8.5$  Hz, 1H), 5.01 (d,  $J = 15.9$  Hz, 1H), 4.73 (d,  $J = 15.8$  Hz, 1H), 4.37 – 4.21 (dd,  $J = 7.1, 5.1$  Hz, 2H), 2.42 (s, 3H), 2.35 (s, 3H), 1.32 (t,  $J = 7.1$  Hz, 3H);  $^{13}\text{C NMR}$  (126 MHz,  $\text{CDCl}_3$ )  $\delta$  171.8, 166.3, 158.9, 144.9, 143.2, 135.9, 135.4, 134.5, 132.4, 129.9( $\times 2$ ), 129.2( $\times 2$ ), 129.0, 128.7, 128.2, 127.5( $\times 2$ ), 124.0( $J$

=286 Hz), 123.0, 118.7(×2), 111.4, 100.3, 98.3, 77.5, 63.8, 44.6, 21.1, 14.0, 13.8 ppm. HRMS (ESI+) calcd for [C<sub>31</sub>H<sub>25</sub>ClF<sub>3</sub>N<sub>3</sub>O<sub>4</sub> + Na]<sup>+</sup> m/z 618.1378, found 618.1373.

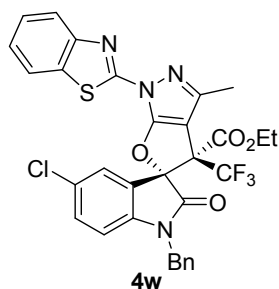

**ethyl-(4R,5R)-1-(benzo[d]thiazol-2-yl)-1'-benzyl-5'-chloro-3-methyl-2'-oxo-4-(trifluoromethyl)-1,4-dihydrospiro[furo[2,3-c]pyrazole-5,3'-indoline]-4-carboxylate**, purified by flash chromatography on silica gel, eluting with petroleum ether/ethyl acetate 15/1 (v/v); white solid, mp149-151°C, 85.5 mg, 67% yield, 98% ee, >20:1 dr. HPLC (AD-H, *i*-PrOH/n-hexane = 7/93, flow rate = 1.0 mL/min,  $\lambda$  = 254 nm)  $t_R$  = 12.4 min (major), 17.3 min (minor).  $[\alpha]_D^{20}$  = -36 (c = 0.51 in CH<sub>2</sub>Cl<sub>2</sub>). <sup>1</sup>H NMR (500 MHz, CDCl<sub>3</sub>)  $\delta$  7.94 – 7.89 (m, 1H), 7.87 – 7.80 (m, 1H), 7.75 – 7.69 (m, 1H), 7.46 – 7.29 (m, 8H), 6.68 (d,  $J$  = 8.5 Hz, 1H), 5.09 (d,  $J$  = 15.9 Hz, 1H), 4.65 (d,  $J$  = 15.9 Hz, 1H), 4.40 – 4.23 (m, 2H), 2.45 (s, 3H), 1.32 (t,  $J$  = 7.1 Hz, 3H); <sup>13</sup>C NMR (126 MHz, CDCl<sub>3</sub>)  $\delta$  171.4, 165.7, 159.8, 158.0, 151.4, 148.3, 143.4, 134.4, 132.8, 132.7, 129.1(×2), 129.1, 128.2, 127.6(×2), 127.5, 126.6, 125.1, 123.8( $J$  = 286 Hz), 123.0, 122.5, 121.6, 111.4, 102.6, 99.0, 77.5, 64.0, 44.8, 14.0, 13.9 ppm. HRMS (ESI+) calcd for [C<sub>31</sub>H<sub>22</sub>ClF<sub>3</sub>N<sub>4</sub>O<sub>4</sub>S + Na]<sup>+</sup> m/z 661.0895, found 661.0887.

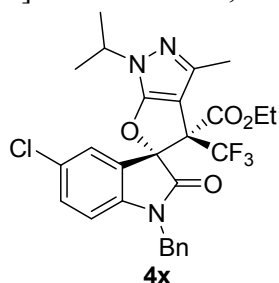

**ethyl-(4R,5R)-1'-benzyl-5'-chloro-1-isopropyl-3-methyl-2'-oxo-4-(trifluoromethyl)-1,4-dihydrospiro[furo[2,3-c]pyrazole-5,3'-indoline]-4-carboxylate**, purified by flash chromatography on silica gel, eluting with petroleum ether/ethyl acetate 15/1 (v/v); white solid, mp153-155°C, 79.9 mg, 73% yield, 99% ee, >20:1 dr. HPLC (IB-H, *i*-PrOH/n-hexane = 20/80, flow rate = 1.0 mL/min,  $\lambda$  = 254 nm)  $t_R$  = 15.8 min (major), 19.4 min (minor).  $[\alpha]_D^{20}$  = -19 (c = 0.52 in CH<sub>2</sub>Cl<sub>2</sub>). <sup>1</sup>H NMR (500 MHz, CDCl<sub>3</sub>)  $\delta$  7.64 (s, 1H), 7.39 – 7.34 (m, 4H), 7.33 – 7.29 (m, 2H), 6.66 (d,  $J$  = 8.5 Hz, 1H), 4.98 (d,  $J$  = 15.9 Hz, 1H), 4.75 (d,  $J$  = 16.0 Hz, 1H), 4.37 – 4.29 (m, 1H), 4.25 (q,  $J$  = 7.1 Hz, 2H), 2.34 (s, 3H), 1.46 (dd,  $J$  = 6.8, 1.9 Hz, 6H), 1.30 (t,  $J$  = 7.2 Hz, 3H); <sup>13</sup>C NMR (126 MHz, CDCl<sub>3</sub>)  $\delta$  171.8, 166.2, 158.8, 143.1, 143.0, 134.4, 132.0, 128.9 (×2), 128.6, 128.5, 128.0, 127.3 (×2), 123.8 ( $J$  = 286 Hz), 122.9, 111.1, 98.2, 97.4, 77.2, 63.4, 51.6, 44.3, 21.9, 21.6, 13.8, 13.4 ppm. HRMS (ESI+) calcd for [C<sub>27</sub>H<sub>25</sub>ClF<sub>3</sub>N<sub>3</sub>O<sub>4</sub> + Na]<sup>+</sup> m/z 570.1378, found 570.1379.



### 3. Scale-up experiment

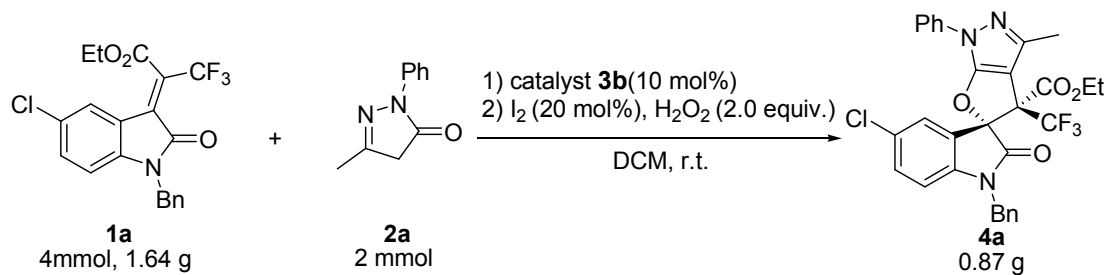

(Z)-ethyl 2-(1-benzyl-5-chloro-2-oxoindolin-3-ylidene)-3,3,3-trifluoropropanoate **1a** (4 mmol) and pyrazolone **2a** (2 mmol) were stirred in CH<sub>2</sub>Cl<sub>2</sub> (20 mL) in the presence of catalyst **3b** (0.02 mmol) at room temperature for 36 h, then I<sub>2</sub> (0.4 mmol) and 30% H<sub>2</sub>O<sub>2</sub> aqueous solution (4 mmol) were added, and the mixture was stirred for 2 h at room temperature. The reaction was monitored by TLC. After completion, the mixture was dried and concentrated. The residue was purified by flash chromatography (petroleum ether/ethyl acetate =10:1) to give the product **4a** in 75% yield (0.87 g, > 20:1 dr and 95% ee).

## 4. ESI-MS spectrum

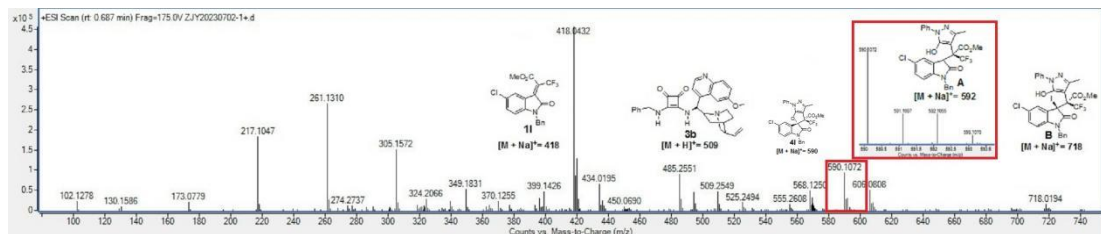

Figure S1 ESI-MS spectrum (positive mode) of the reaction

## 5. <sup>1</sup>H, <sup>13</sup>C NMR spectra and HPLC chromatograms of compounds 4a-4x

### <sup>1</sup>H NMR spectrum of 4a (CDCl<sub>3</sub>, 500 MHz)

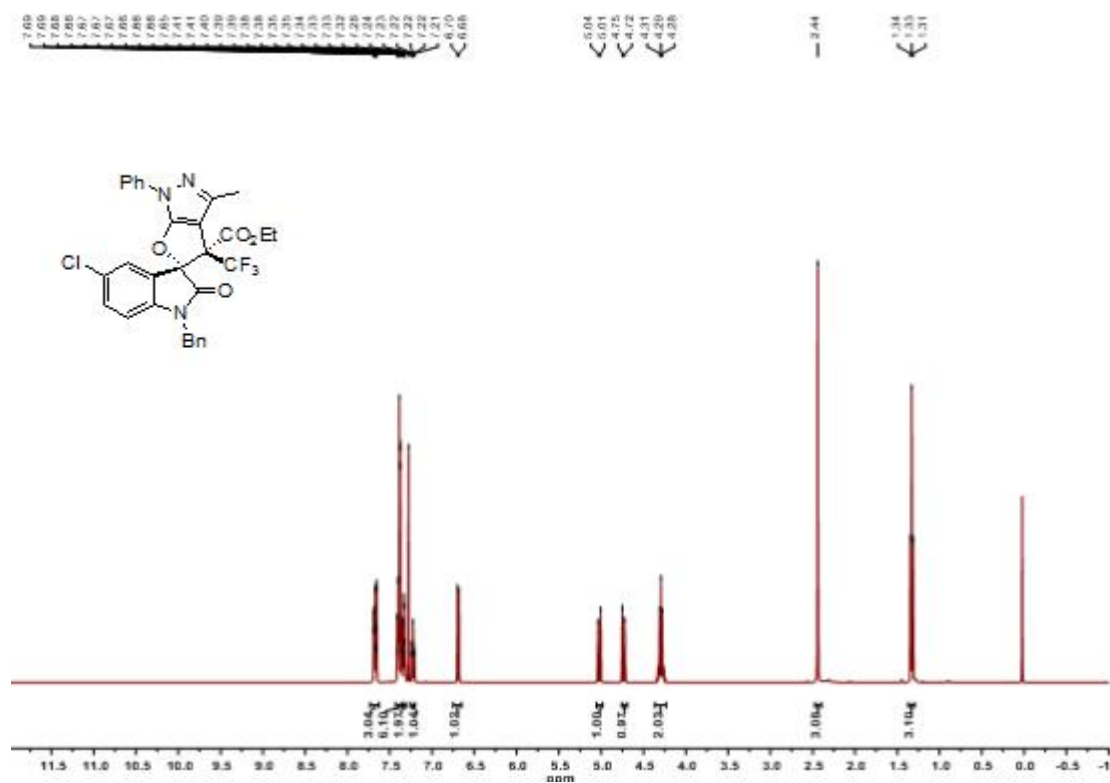

### <sup>13</sup>C NMR spectrum of 4a (CDCl<sub>3</sub>, 125 MHz)

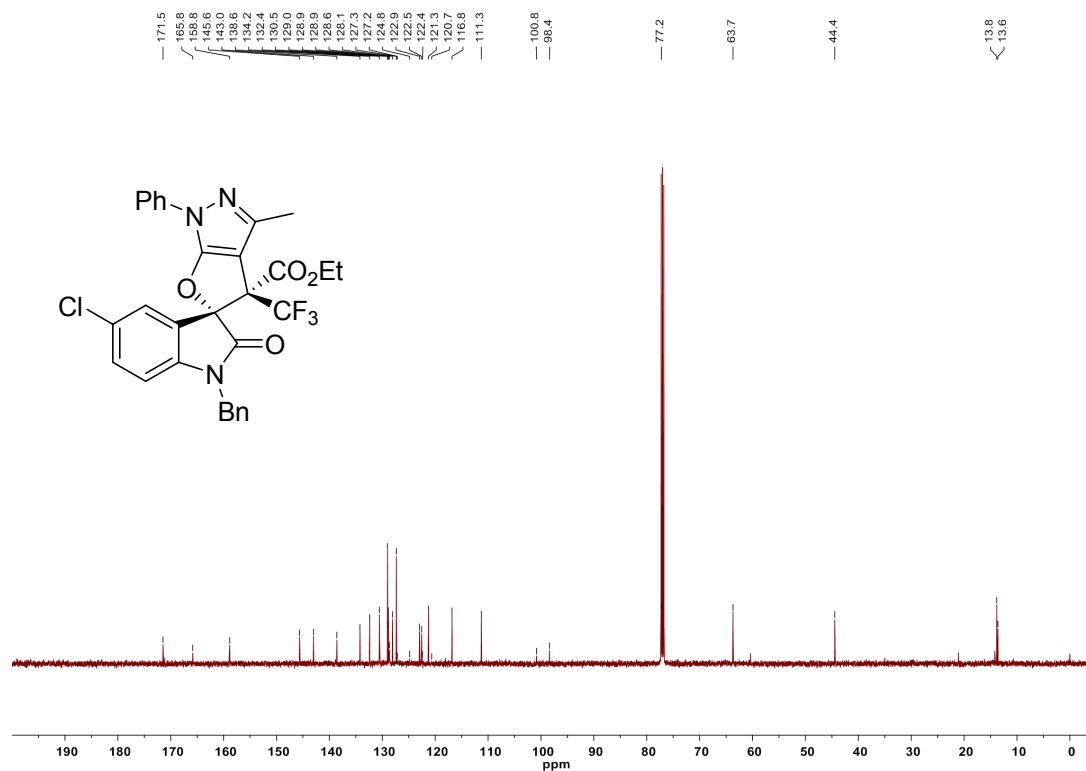

## HPLC chromatograms of 4a

### 4a-rac

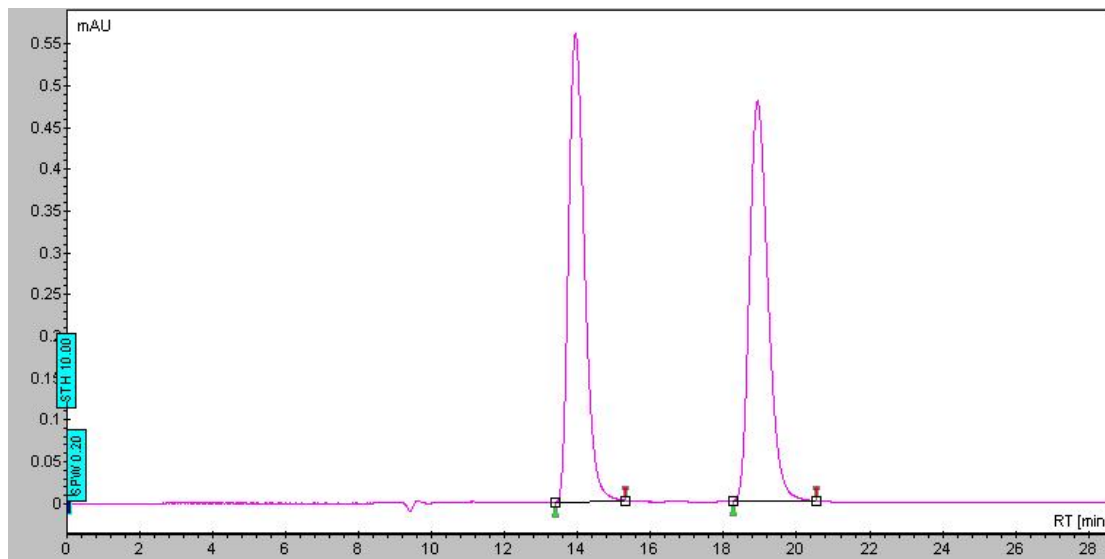

| # | Start time[min] | Time[min] | End time[min] | Area%  |
|---|-----------------|-----------|---------------|--------|
| 1 | 13.388          | 13.932    | 15.306        | 50.080 |
| 2 | 18.263          | 18.932    | 20.541        | 49.920 |

### 4a-chr

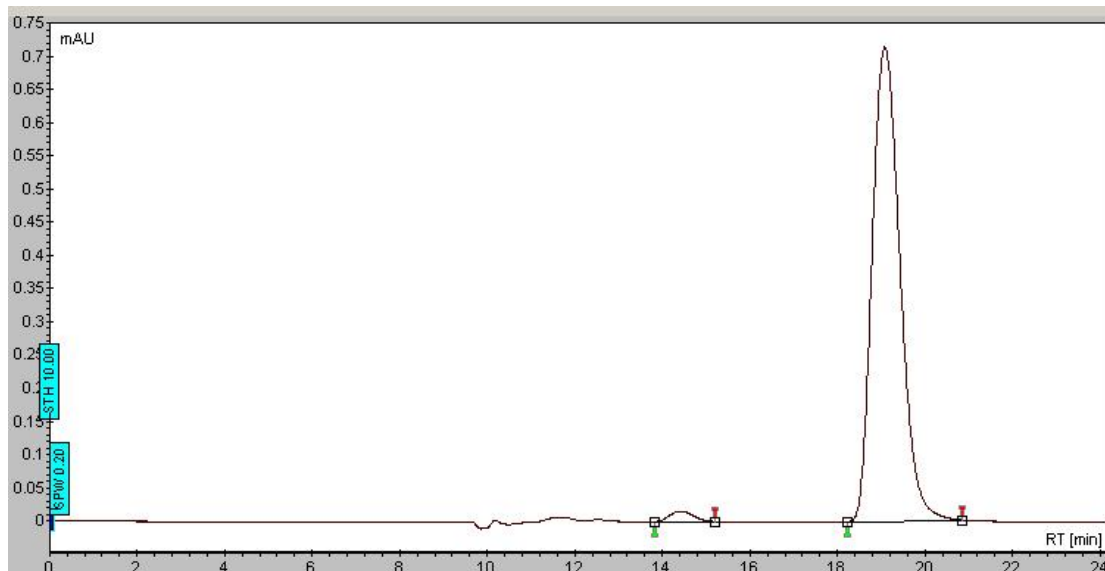

| # | Start time[min] | Time[min] | End time[min] | Area%  |
|---|-----------------|-----------|---------------|--------|
| 1 | 13.822          | 14.412    | 15.201        | 1.808  |
| 2 | 18.228          | 19.079    | 20.851        | 98.192 |

### <sup>1</sup>H NMR spectrum of 4b (CDCl<sub>3</sub>, 500 MHz)

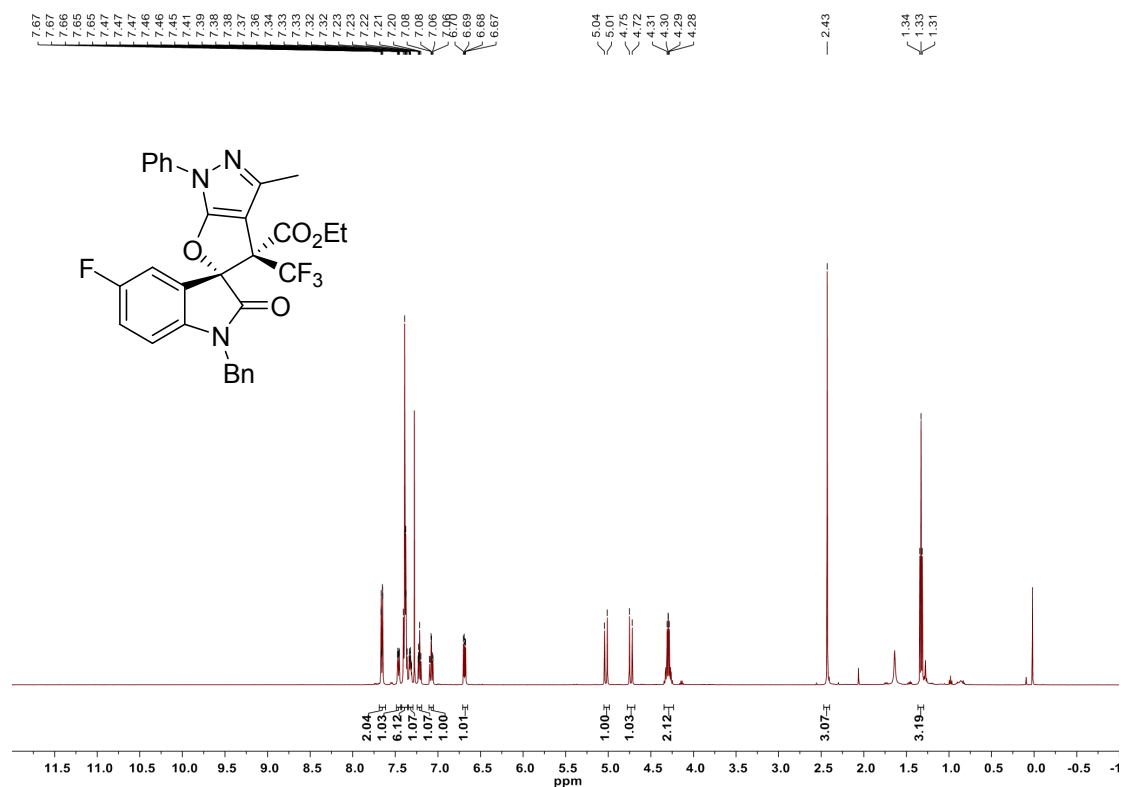

### <sup>13</sup>C NMR spectrum of 4b (CDCl<sub>3</sub>, 125 MHz)

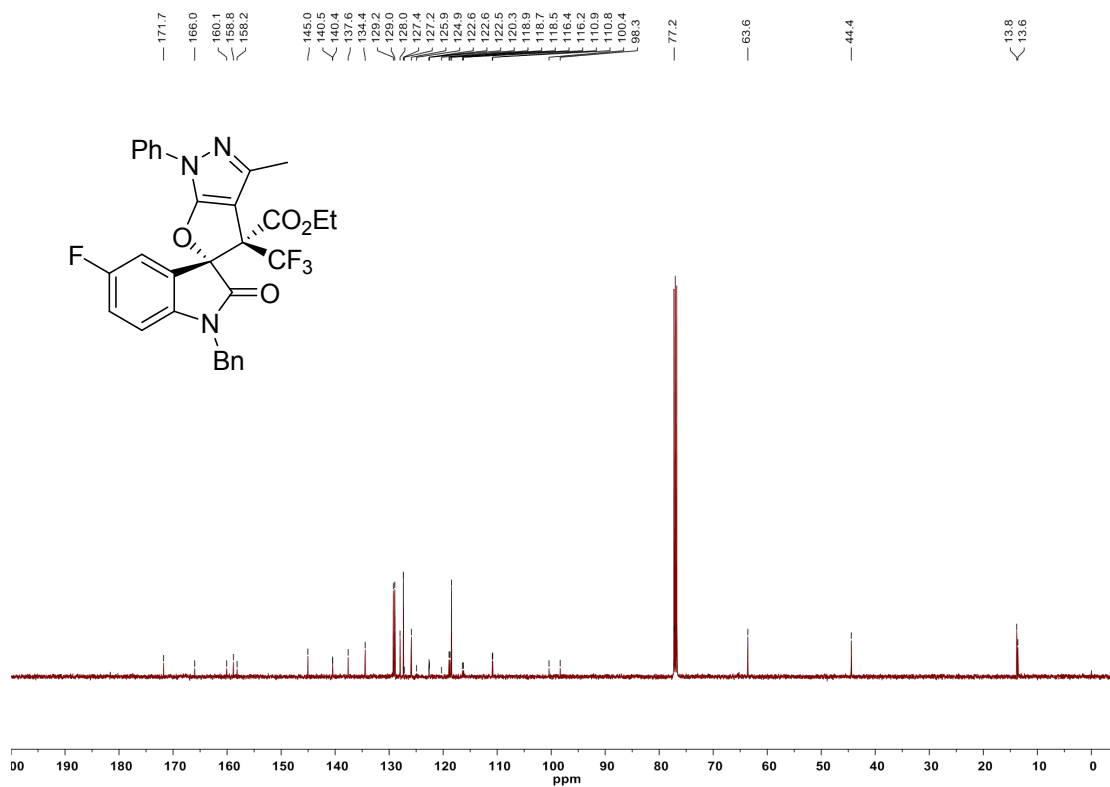

## HPLC chromatograms of 4b

### 4b-rac

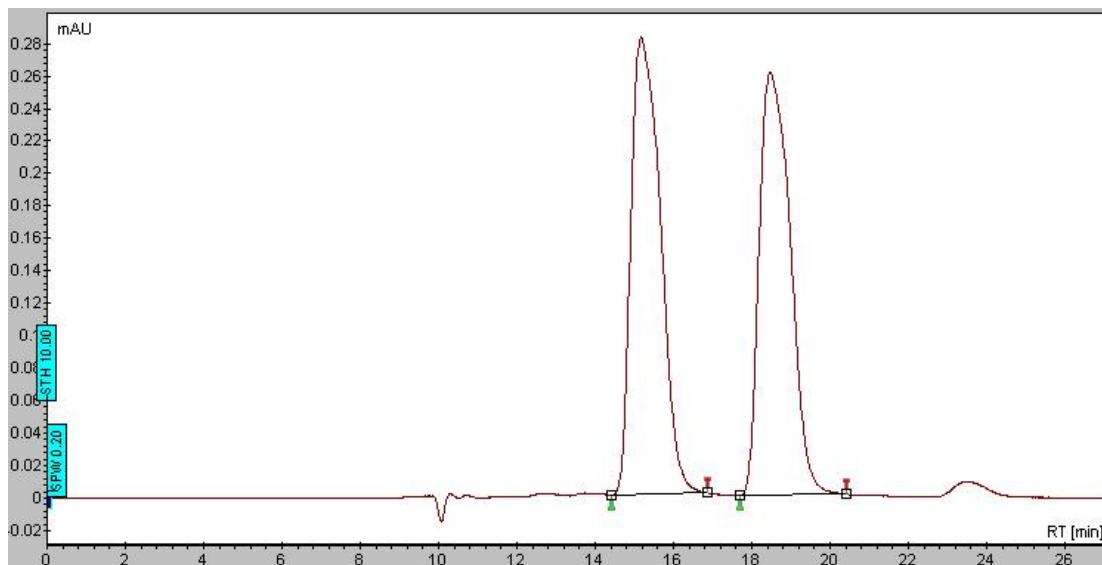

| # | Start time[min] | Time[min] | End time[min] | Area%  |
|---|-----------------|-----------|---------------|--------|
| 1 | 14.407          | 15.159    | 16.859        | 50.700 |
| 2 | 17.689          | 18.465    | 20.404        | 49.300 |

### 4b-chr

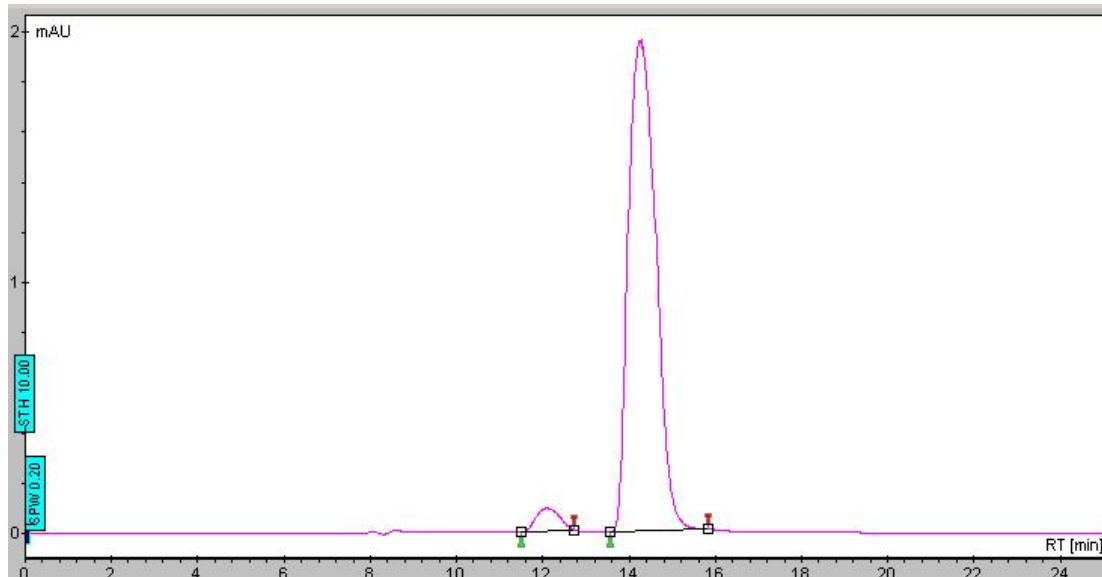

| # | Start time[min] | Time[min] | End time[min] | Area%  |
|---|-----------------|-----------|---------------|--------|
| 1 | 11.498          | 12.092    | 12.721        | 3.800  |
| 2 | 13.560          | 14.279    | 15.832        | 96.200 |

### $^1\text{H}$ NMR spectrum of 4c ( $\text{CDCl}_3$ , 500 MHz)

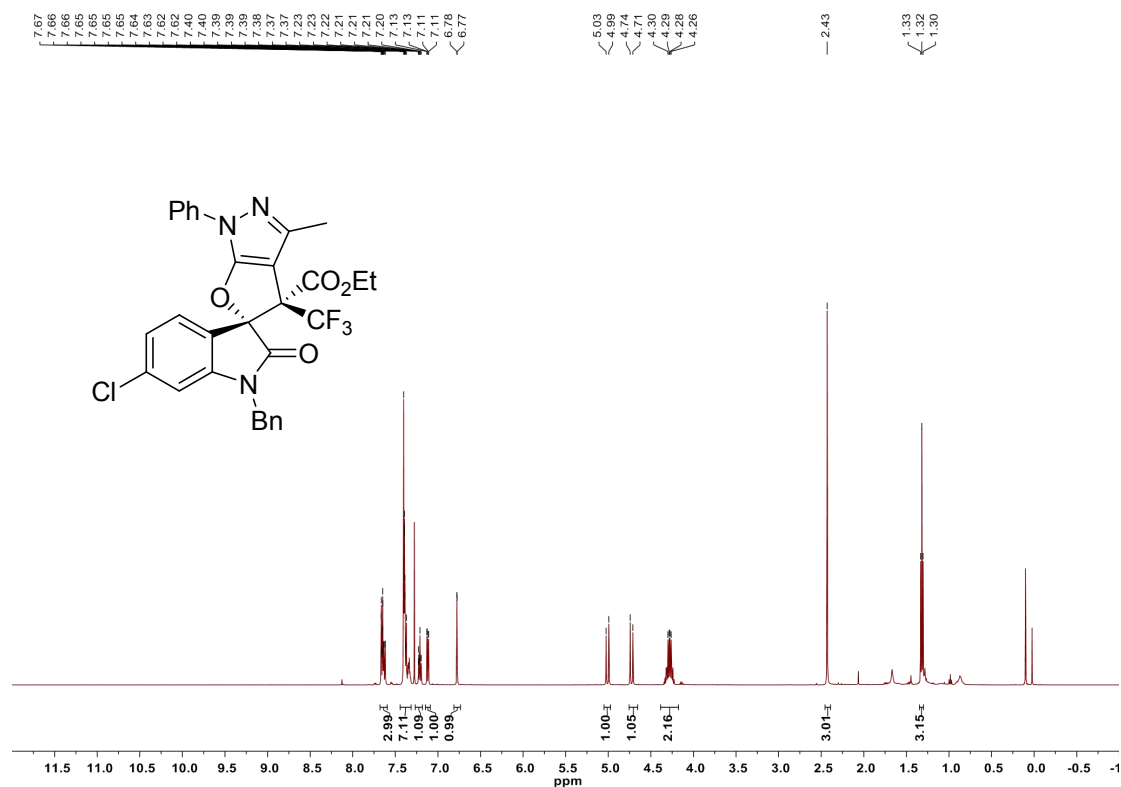

### $^{13}\text{C}$ NMR spectrum of 4c ( $\text{CDCl}_3$ , 125 MHz)

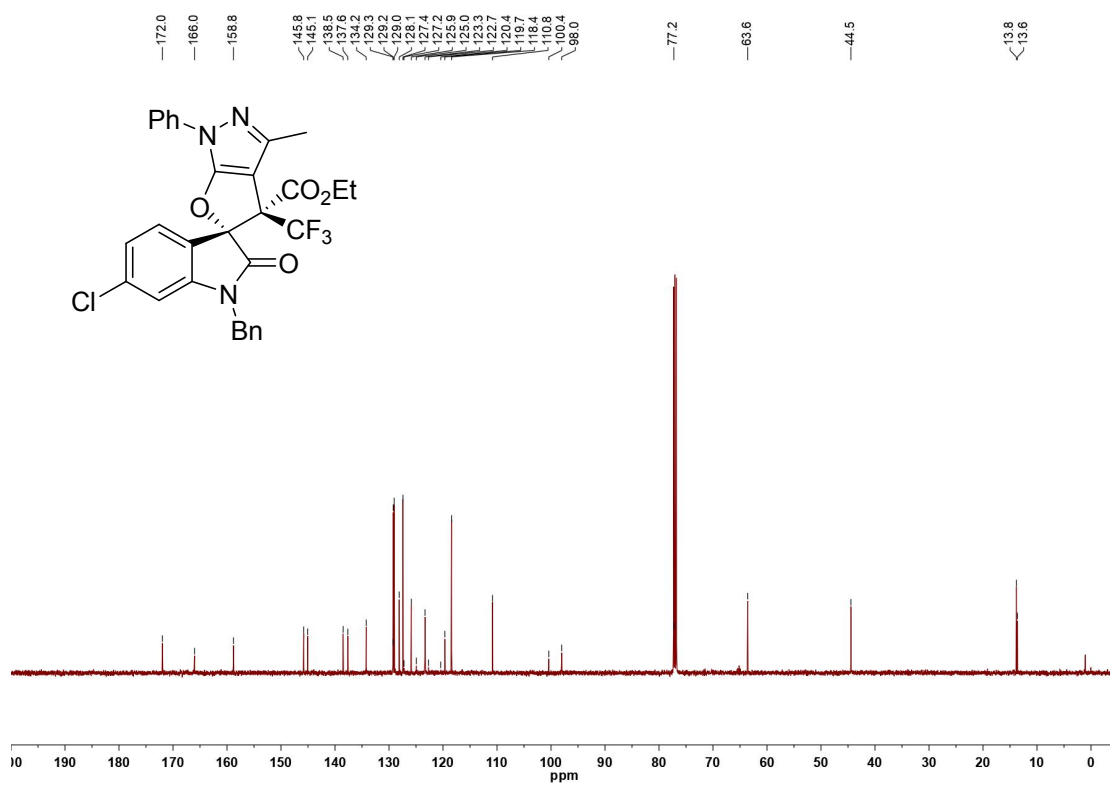

## HPLC chromatograms of 4c

### 4c-rac

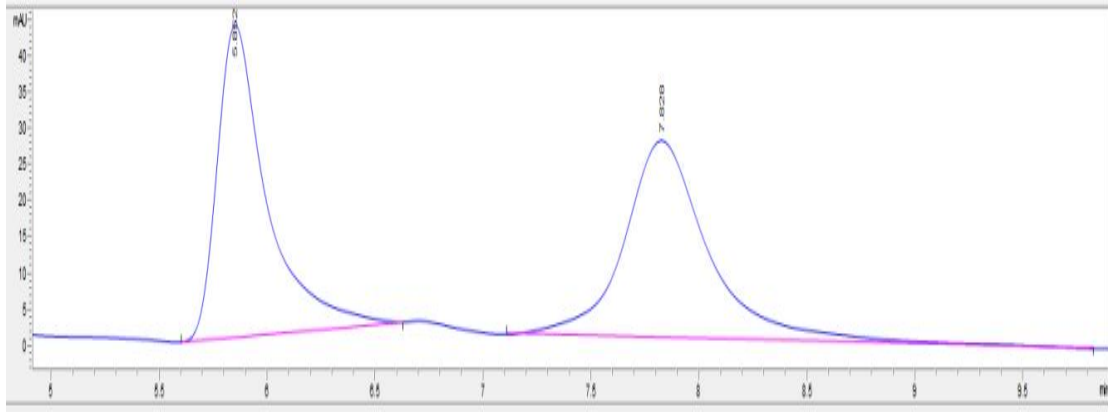

| # | 时间    | 峰面积   | 峰高   | 峰宽     | 对称因子  | 峰面积 %  | 类型 |
|---|-------|-------|------|--------|-------|--------|----|
| 1 | 5.852 | 689.1 | 43   | 0.2348 | 0.519 | 47.641 | BB |
| 2 | 7.828 | 757.3 | 27.2 | 0.405  | 0.737 | 52.359 | BB |

### 4c-chr

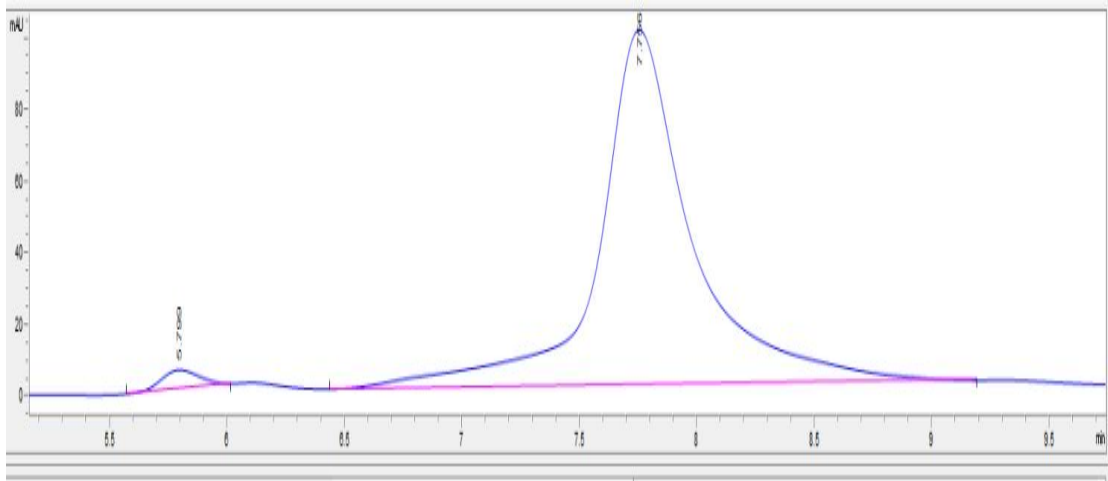

| # | 时间    | 峰面积    | 峰高   | 峰宽     | 对称因子  | 峰面积 %  | 类型 |
|---|-------|--------|------|--------|-------|--------|----|
| 1 | 5.799 | 58.5   | 5.2  | 0.1748 | 0.904 | 2.080  | BB |
| 2 | 7.756 | 2753.3 | 98.4 | 0.3944 | 0.779 | 97.920 | BB |



### <sup>1</sup>H NMR spectrum of 4d (CDCl<sub>3</sub>, 500 MHz)

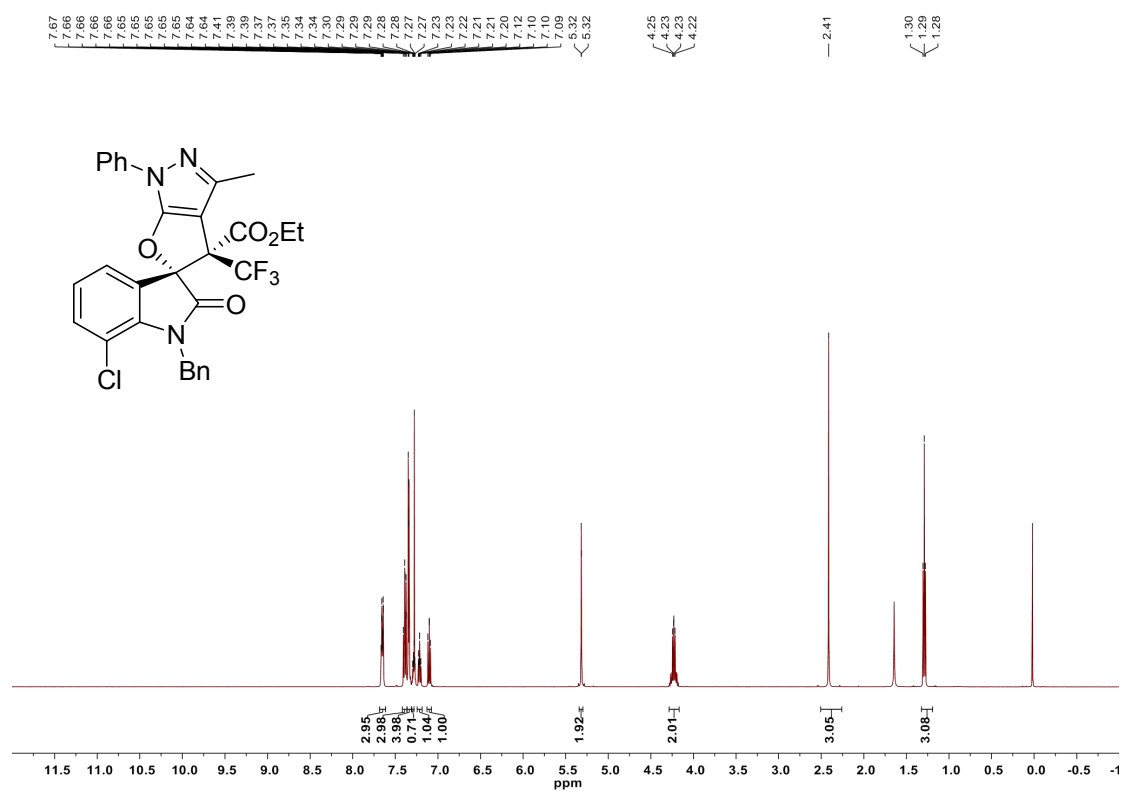

### <sup>13</sup>C NMR spectrum of 4d (CDCl<sub>3</sub>, 125 MHz)

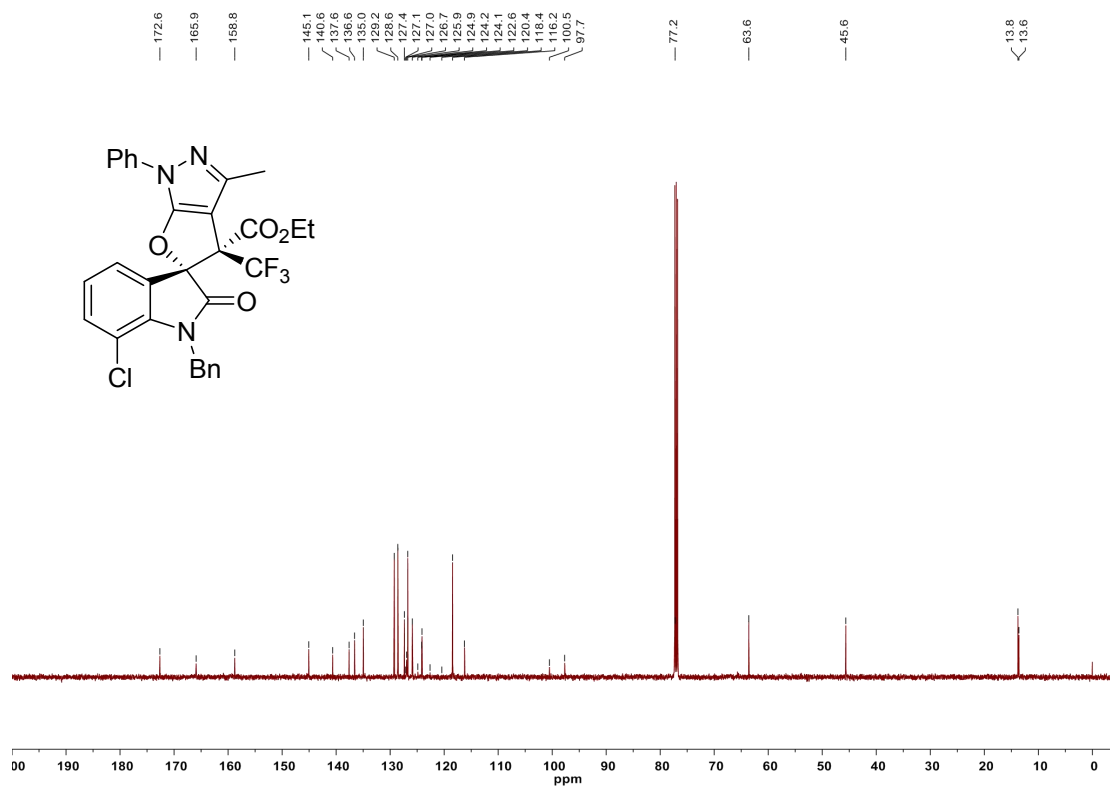

## HPLC chromatograms of 4d

### 4d-rac

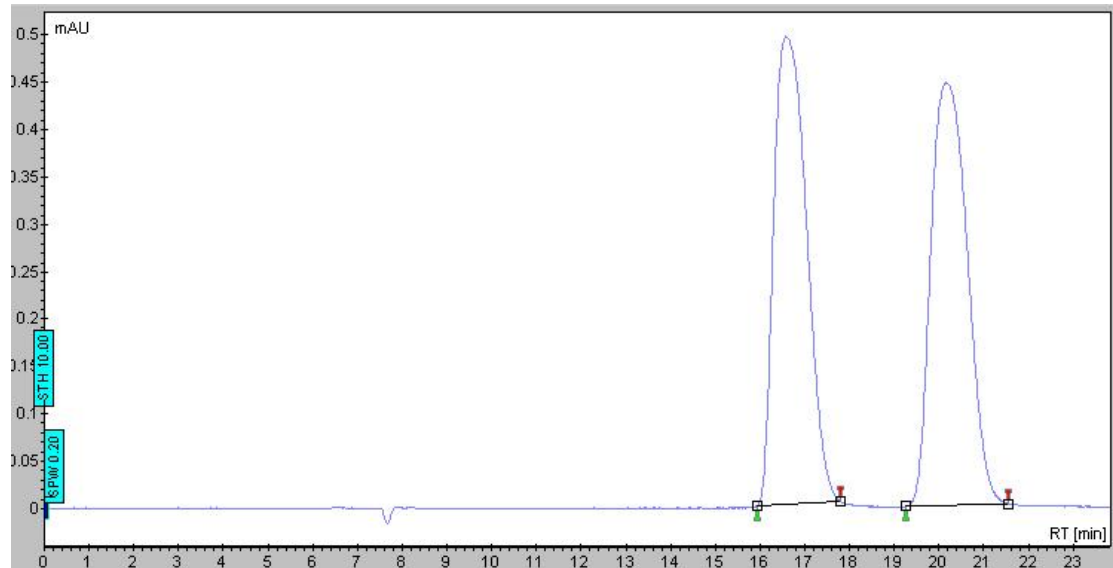

| # | Start time[min] | Time[min] | End time[min] | Area%  |
|---|-----------------|-----------|---------------|--------|
| 1 | 15.938          | 16.572    | 17.797        | 49.820 |
| 2 | 19.258          | 20.145    | 21.549        | 50.180 |

### 4d-chr

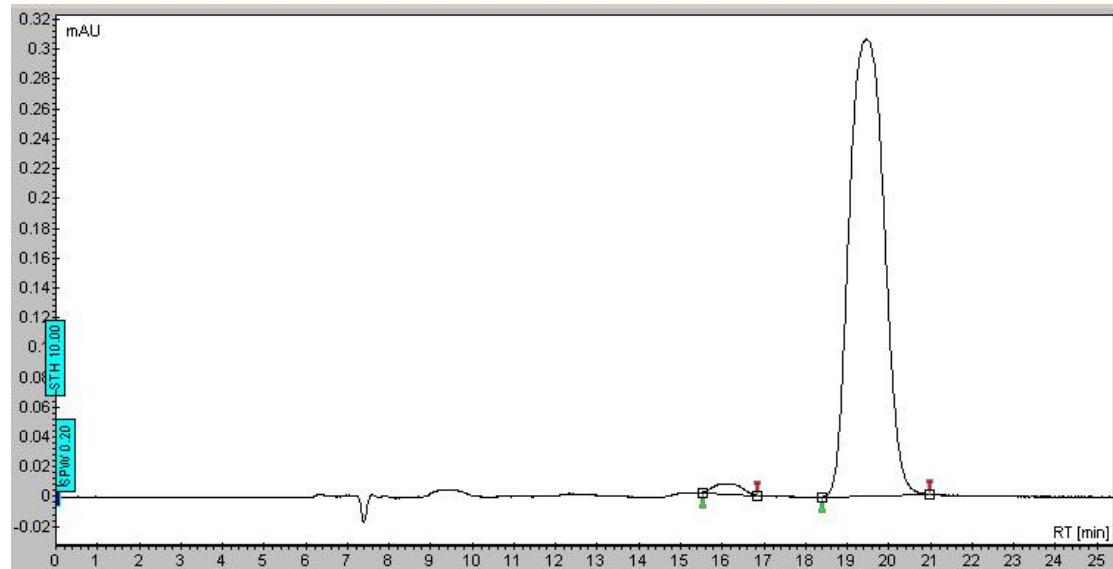

| # | Start time[min] | Time[min] | End time[min] | Area%  |
|---|-----------------|-----------|---------------|--------|
| 1 | 15.530          | 16.132    | 16.839        | 1.760  |
| 2 | 18.396          | 19.452    | 20.978        | 98.240 |

### $^1\text{H}$ NMR spectrum of 4e ( $\text{CDCl}_3$ , 500 MHz)

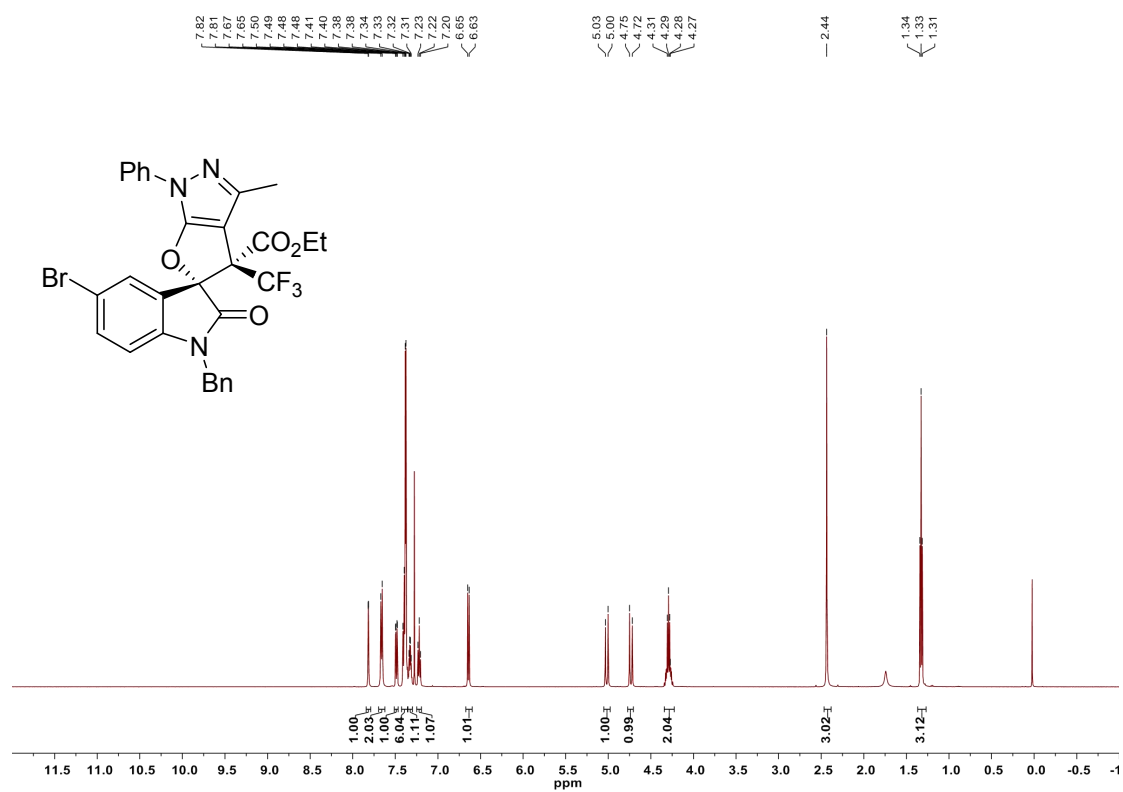

### $^{13}\text{C}$ NMR spectrum of 4e ( $\text{CDCl}_3$ , 125 MHz)

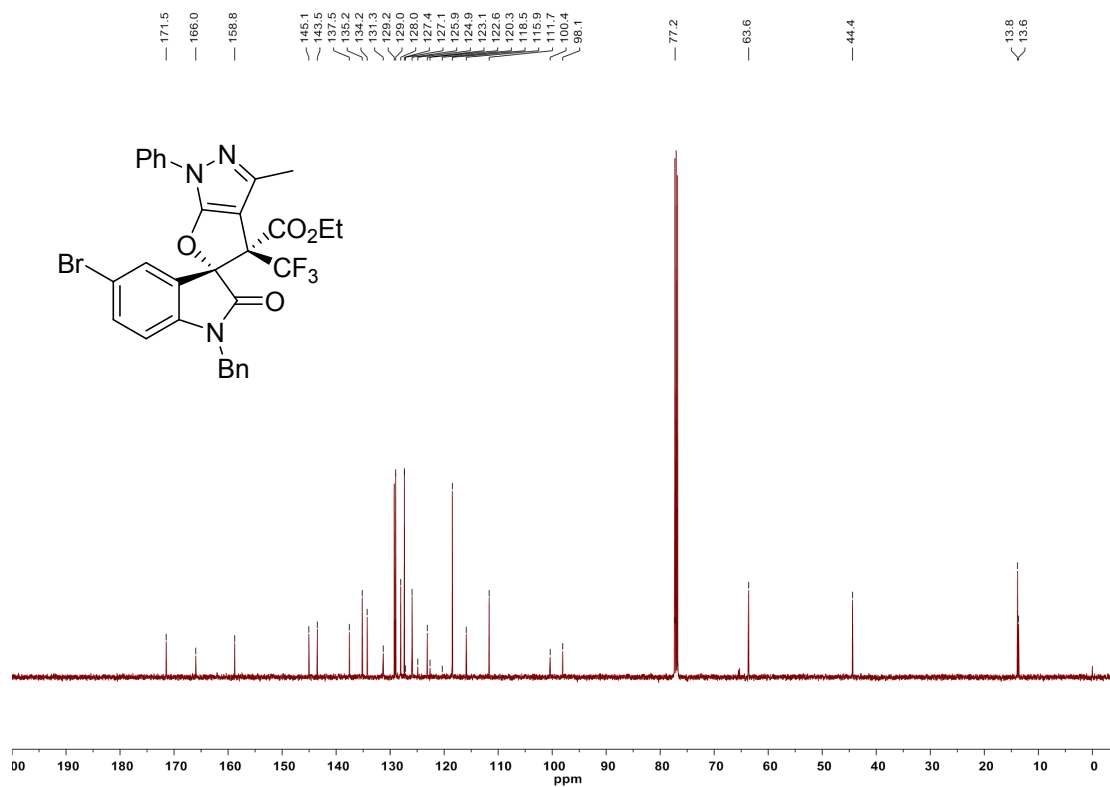

## HPLC chromatograms of 4e

### 4e-rac

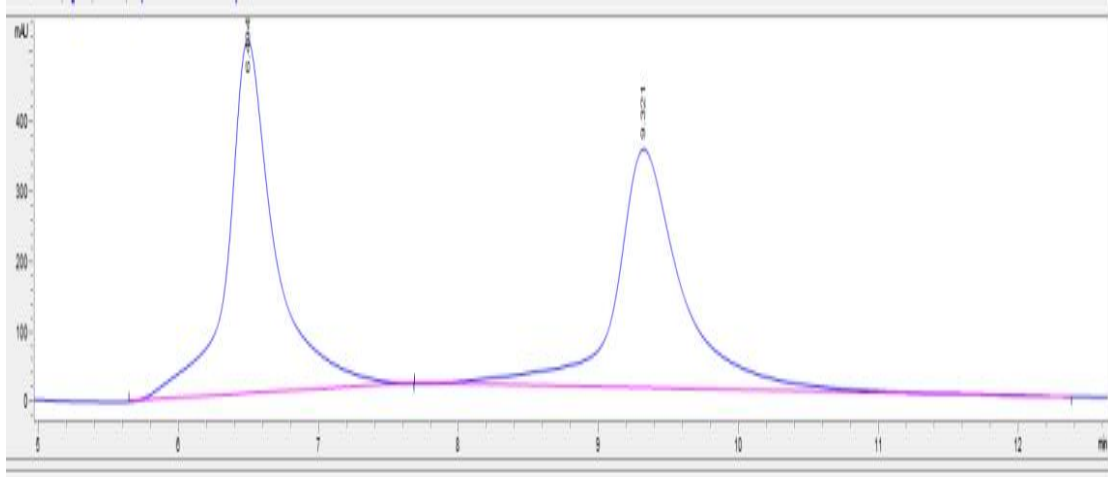

| # | 时间    | 峰面积     | 峰高    | 峰宽     | 对称因子  | 峰面积 %  | 类型  |
|---|-------|---------|-------|--------|-------|--------|-----|
| 1 | 6.494 | 12002.7 | 506.6 | 0.3304 | 0.741 | 50.940 | BB  |
| 2 | 9.321 | 11559.5 | 341.6 | 0.4788 | 0.746 | 49.060 | BBA |

### 4e-chr

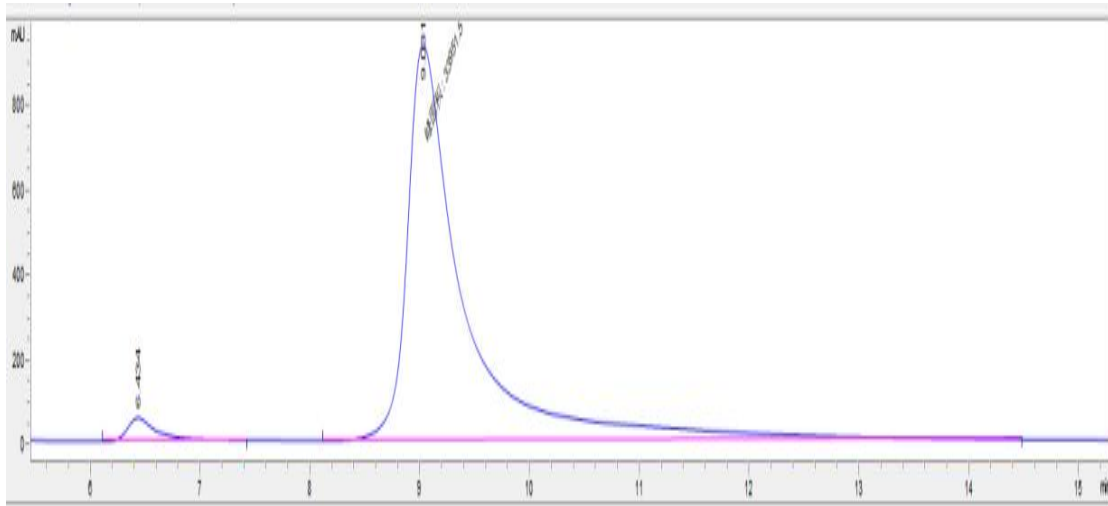

| # | 时间    | 峰面积     | 峰高    | 峰宽     | 对称因子  | 峰面积 %  | 类型 |
|---|-------|---------|-------|--------|-------|--------|----|
| 1 | 6.434 | 1013    | 54.2  | 0.2722 | 0.511 | 2.897  | BB |
| 2 | 9.031 | 33951.5 | 936.3 | 0.6044 | 0.372 | 97.103 | MM |

### $^1\text{H}$ NMR spectrum of 4f ( $\text{CDCl}_3$ , 500 MHz)

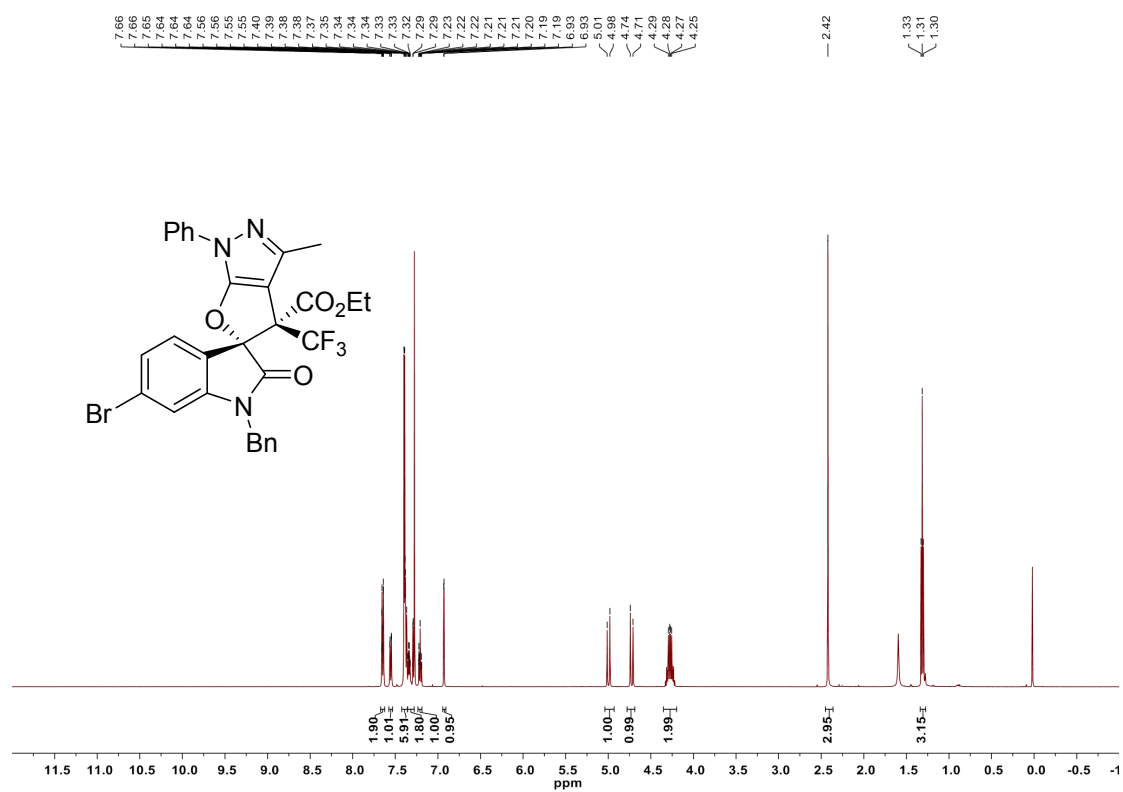

### $^{13}\text{C}$ NMR spectrum of 4f ( $\text{CDCl}_3$ , 125 MHz)

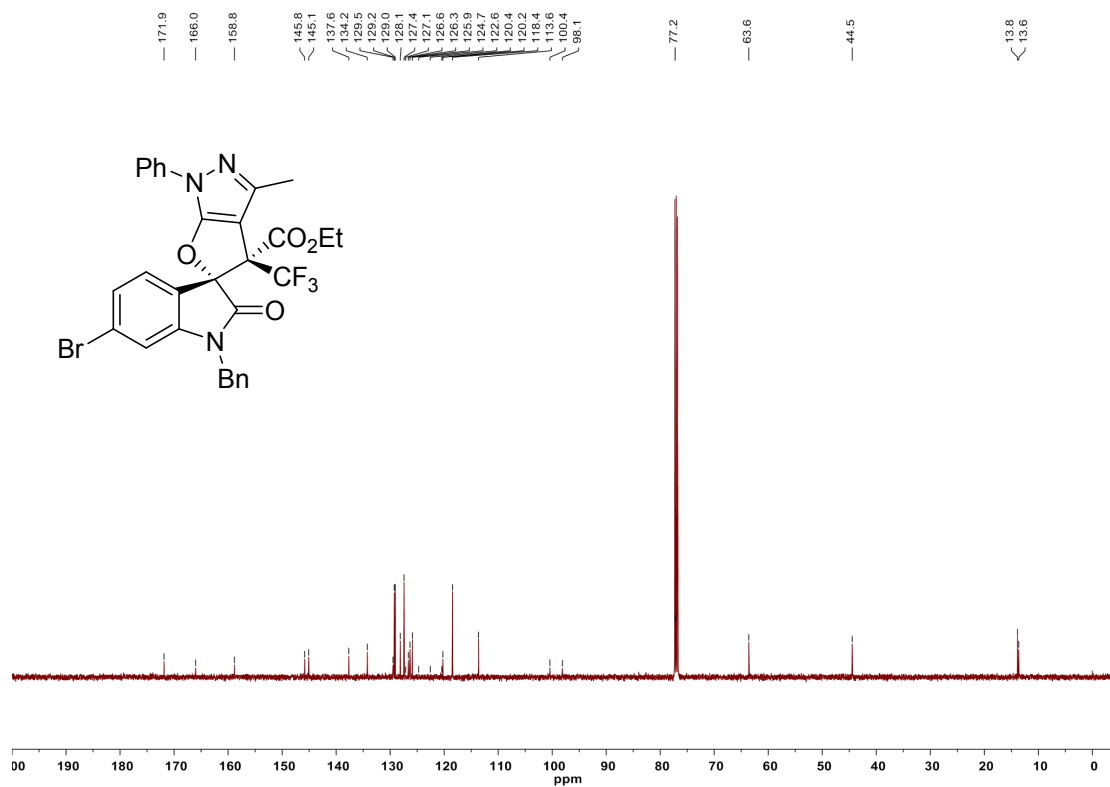

## HPLC chromatograms of 4f

### 4f-rac

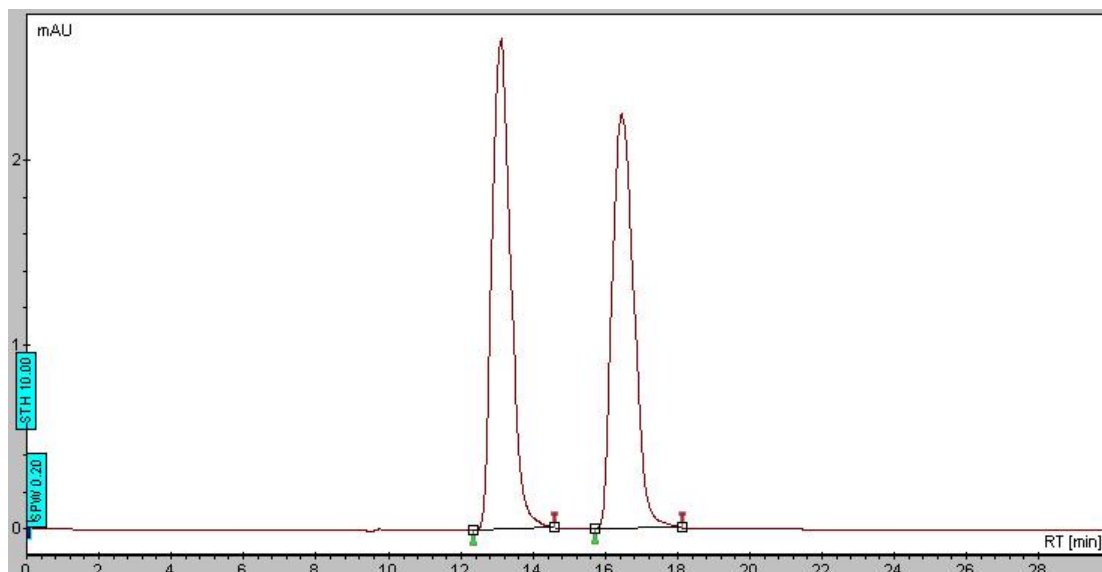

| # | Start time[min] | Time[min] | End time[min] | Area%  |
|---|-----------------|-----------|---------------|--------|
| 1 | 12.349          | 13.119    | 14.594        | 50.424 |
| 2 | 15.717          | 16.465    | 28.128        | 49.576 |

### 4f-chr

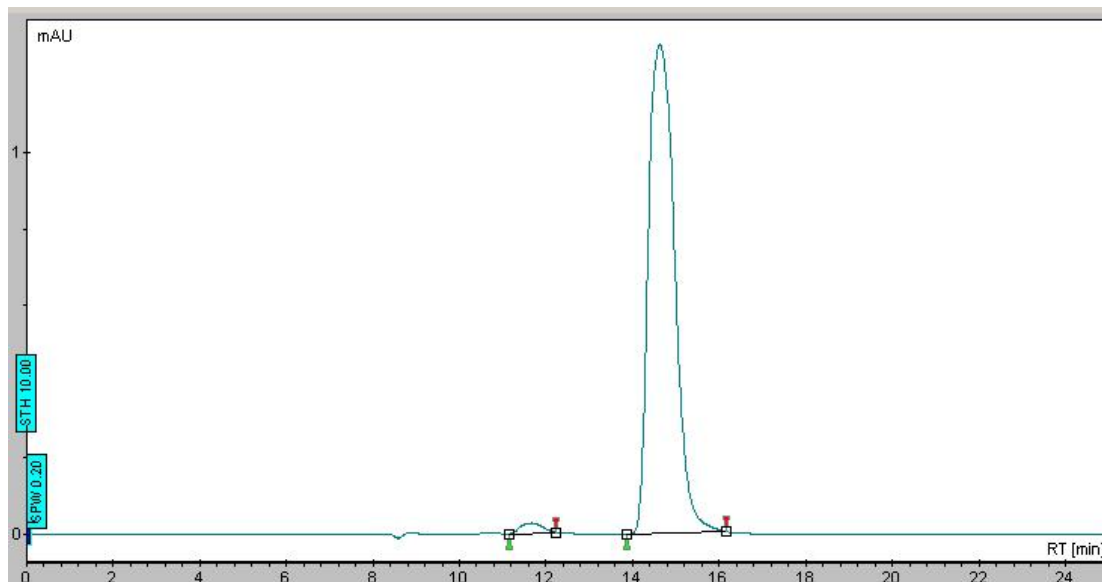

| # | Start time[min] | Time[min] | End time[min] | Area%  |
|---|-----------------|-----------|---------------|--------|
| 1 | 11.148          | 11.639    | 12.228        | 1.639  |
| 2 | 13.865          | 14.626    | 16.165        | 98.307 |

### $^1\text{H}$ NMR spectrum of 4g ( $\text{CDCl}_3$ , 500 MHz)

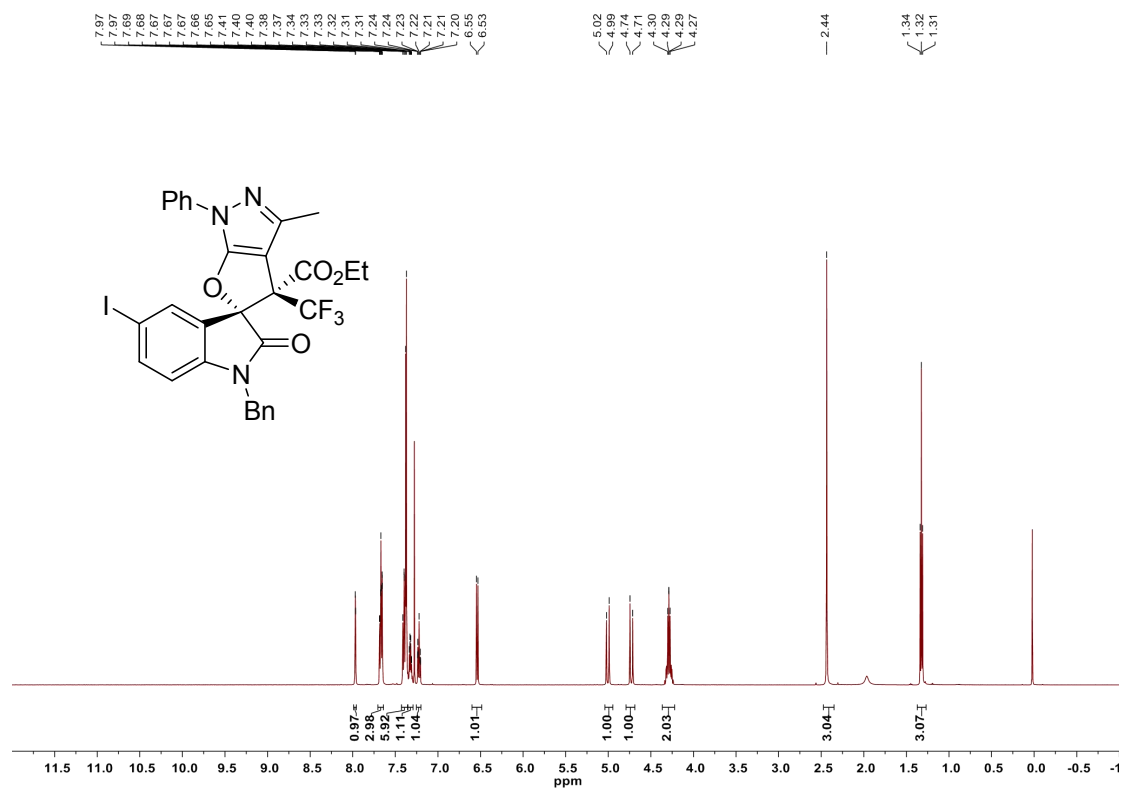

### $^{13}\text{C}$ NMR spectrum of 4g ( $\text{CDCl}_3$ , 125 MHz)

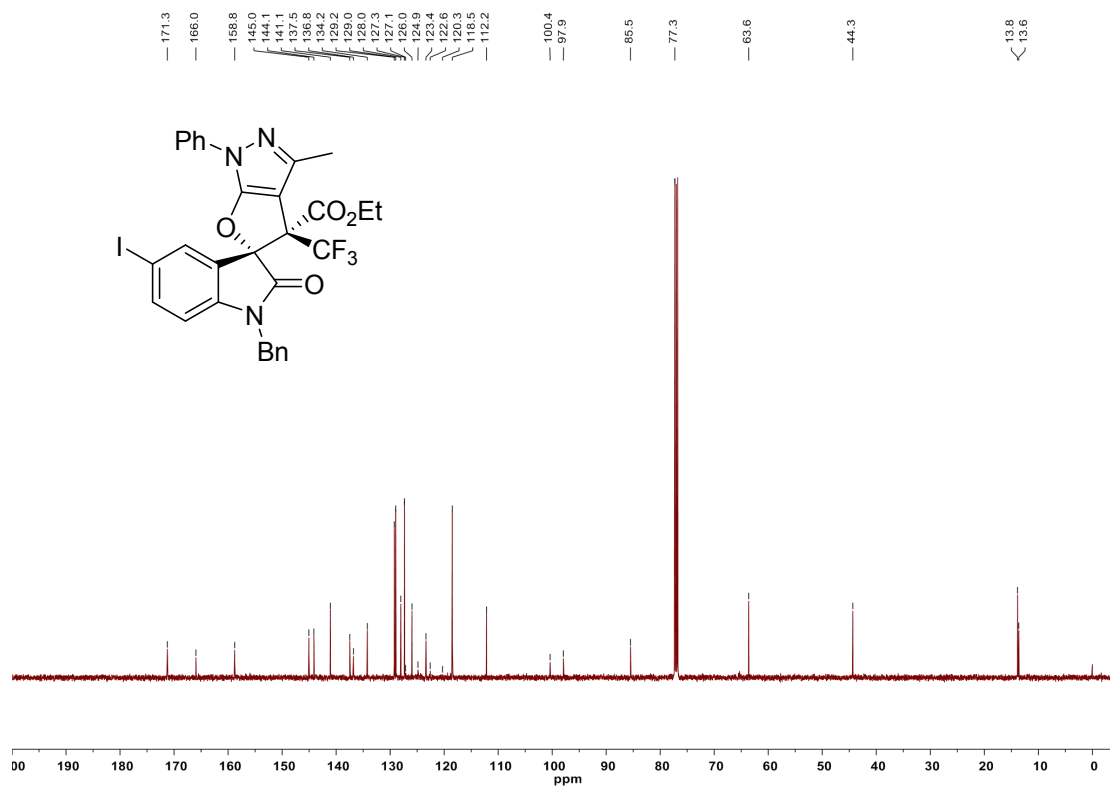

## HPLC chromatograms of 4g

### 4g-rac

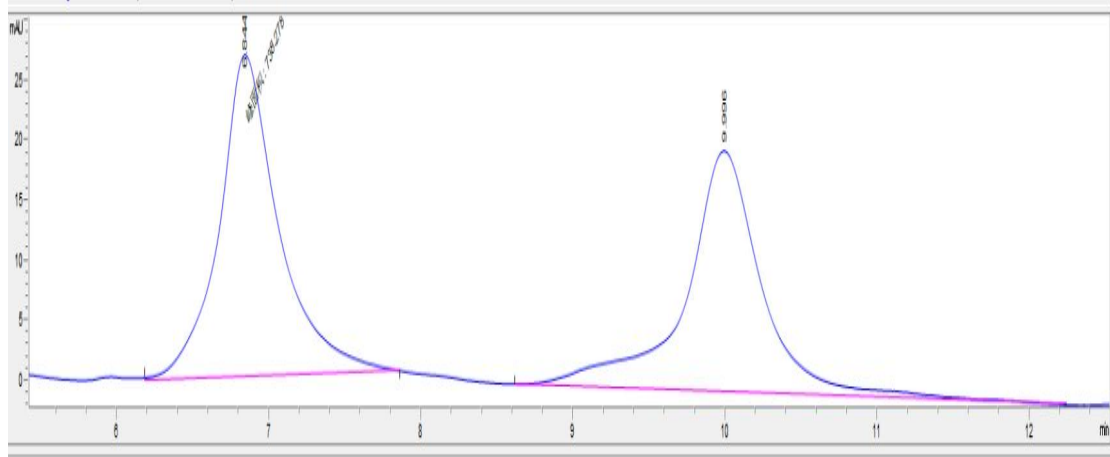

| # | 时间    | 峰面积   | 峰高   | 峰宽     | 对称因子  | 峰面积 %  | 类型 |
|---|-------|-------|------|--------|-------|--------|----|
| 1 | 6.844 | 738.3 | 26.8 | 0.4588 | 0.758 | 50.807 | MM |
| 2 | 9.996 | 714.8 | 20   | 0.4983 | 1.013 | 49.193 | BB |

### 4g-chr

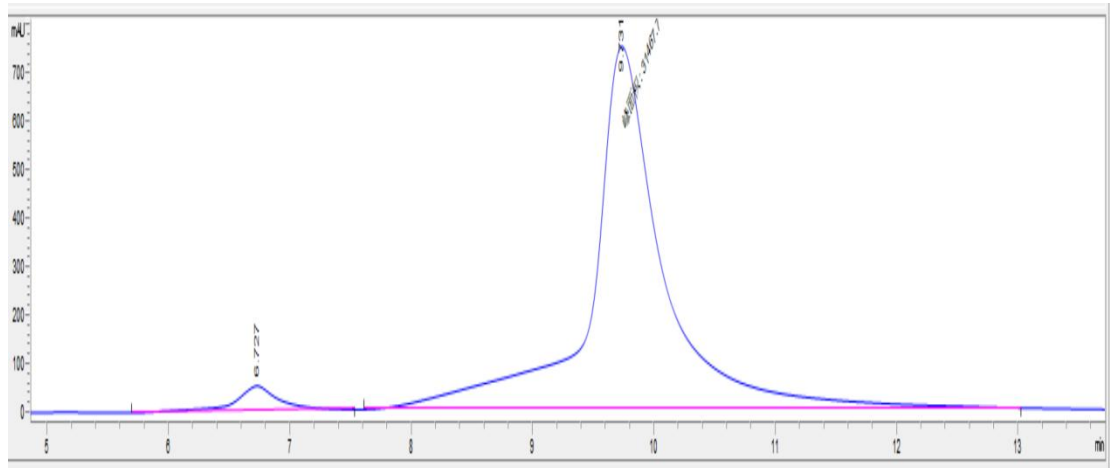

| # | 时间    | 峰面积     | 峰高    | 峰宽     | 对称因子  | 峰面积 %  | 类型 |
|---|-------|---------|-------|--------|-------|--------|----|
| 1 | 6.727 | 1329.1  | 51.5  | 0.365  | 1.027 | 4.053  | BB |
| 2 | 9.731 | 31467.7 | 747.9 | 0.7012 | 0.762 | 95.947 | MM |



### <sup>1</sup>H NMR spectrum of 4h (CDCl<sub>3</sub>, 500 MHz)

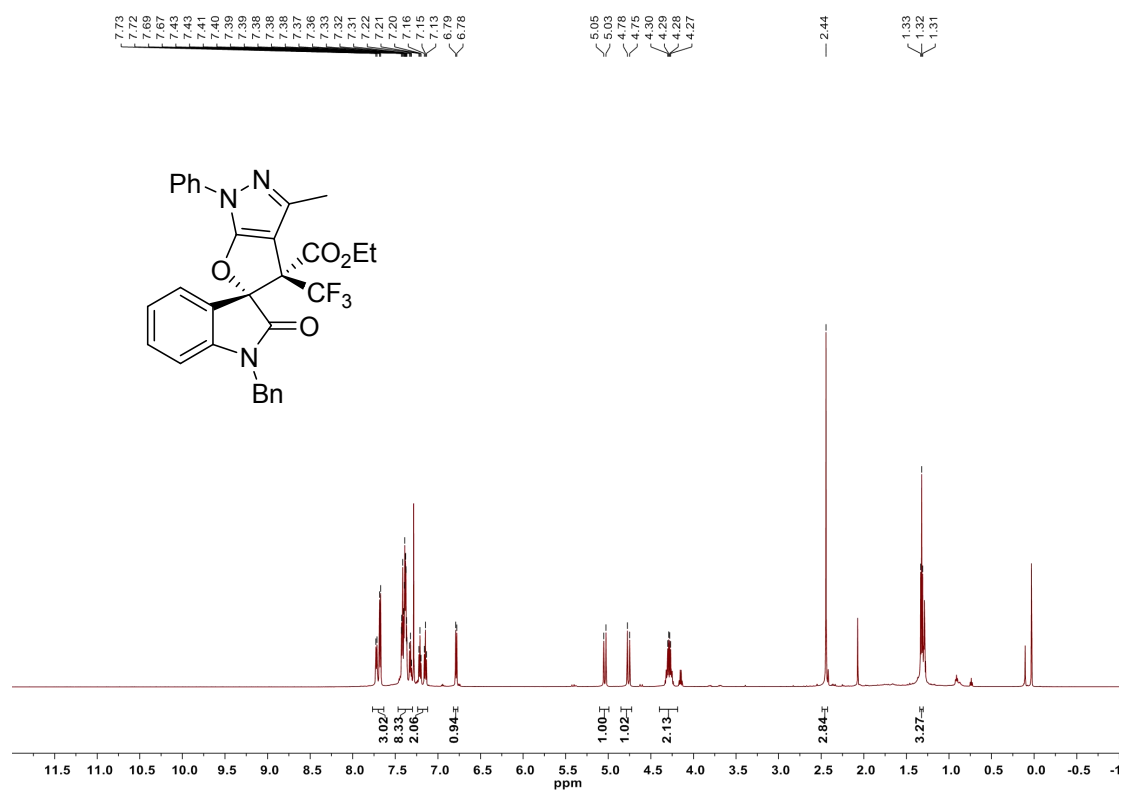

### <sup>13</sup>C NMR spectrum of 4h (CDCl<sub>3</sub>, 125 MHz)

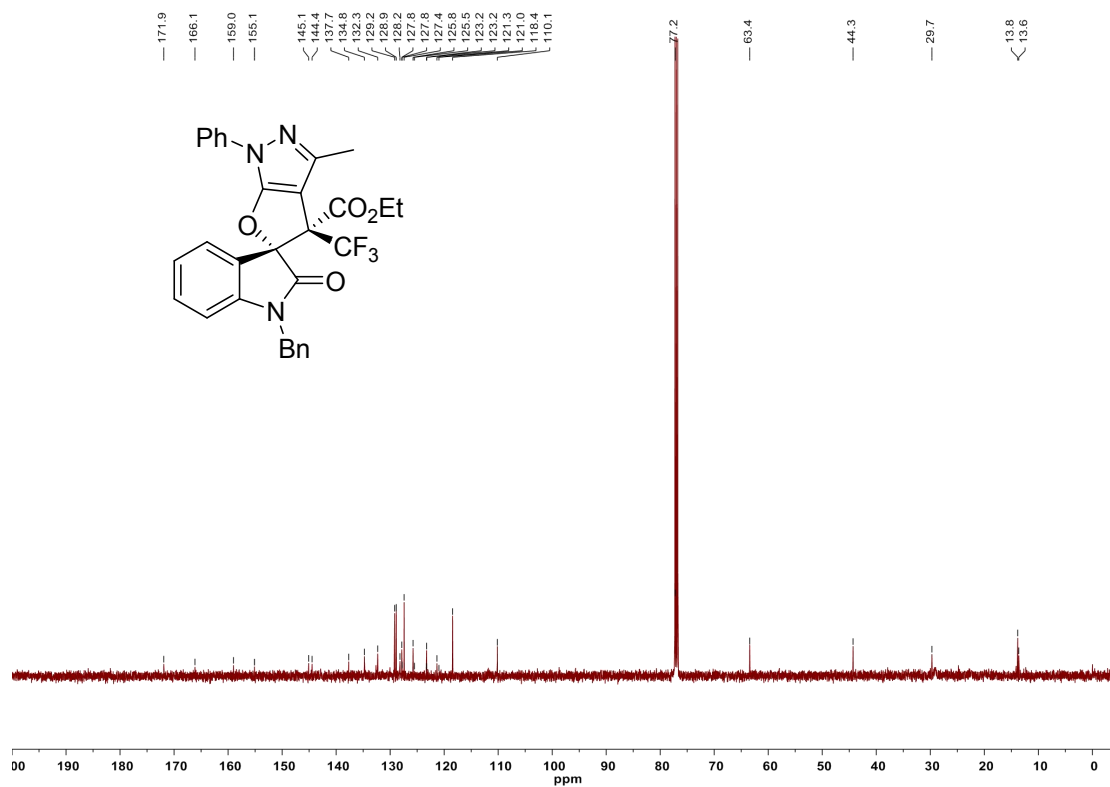

## HPLC chromatograms of 4h

### 4h-rac

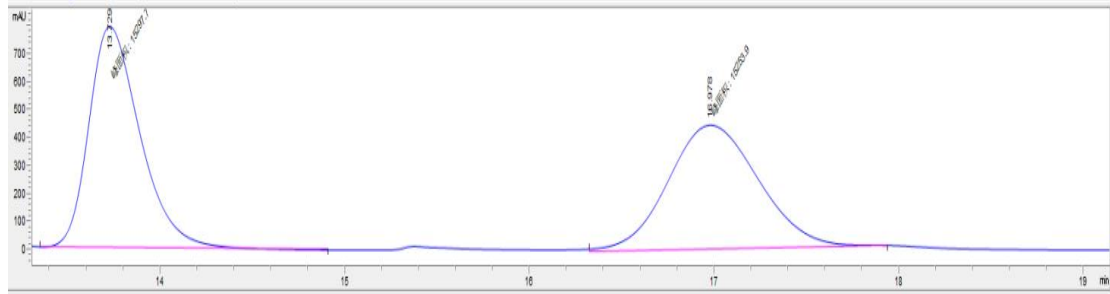

| # | 时间     | 峰面积     | 峰高    | 峰宽     | 对称因子  | 峰面积 %  | 类型 |
|---|--------|---------|-------|--------|-------|--------|----|
| 1 | 13.729 | 15297.7 | 796.2 | 0.3202 | 0.672 | 50.072 | MM |
| 2 | 16.978 | 15253.9 | 446.6 | 0.5693 | 0.875 | 49.928 | MM |

### 4h-chr

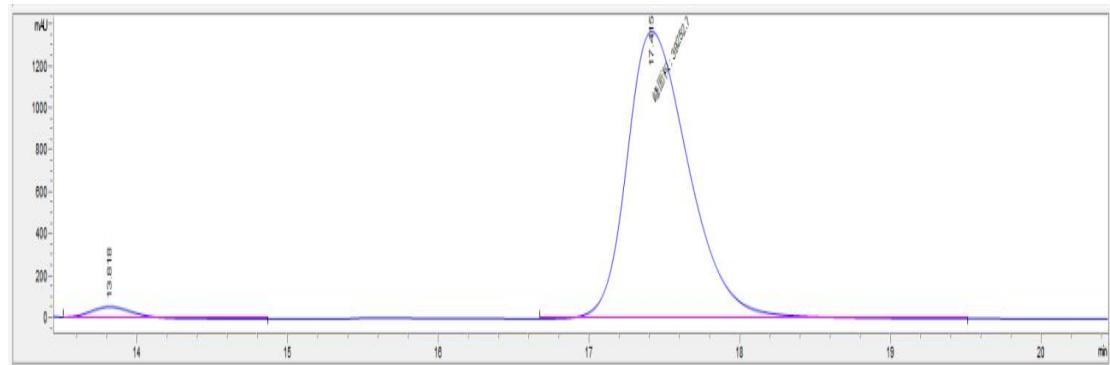

| # | 时间     | 峰面积     | 峰高     | 峰宽     | 对称因子  | 峰面积 %  | 类型 |
|---|--------|---------|--------|--------|-------|--------|----|
| 1 | 13.818 | 1234    | 57.3   | 0.3252 | 0.792 | 3.048  | VB |
| 2 | 17.415 | 39252.7 | 1369.9 | 0.4776 | 0.653 | 96.952 | MM |

### <sup>1</sup>H NMR spectrum of 4i (CDCl<sub>3</sub>, 500 MHz)

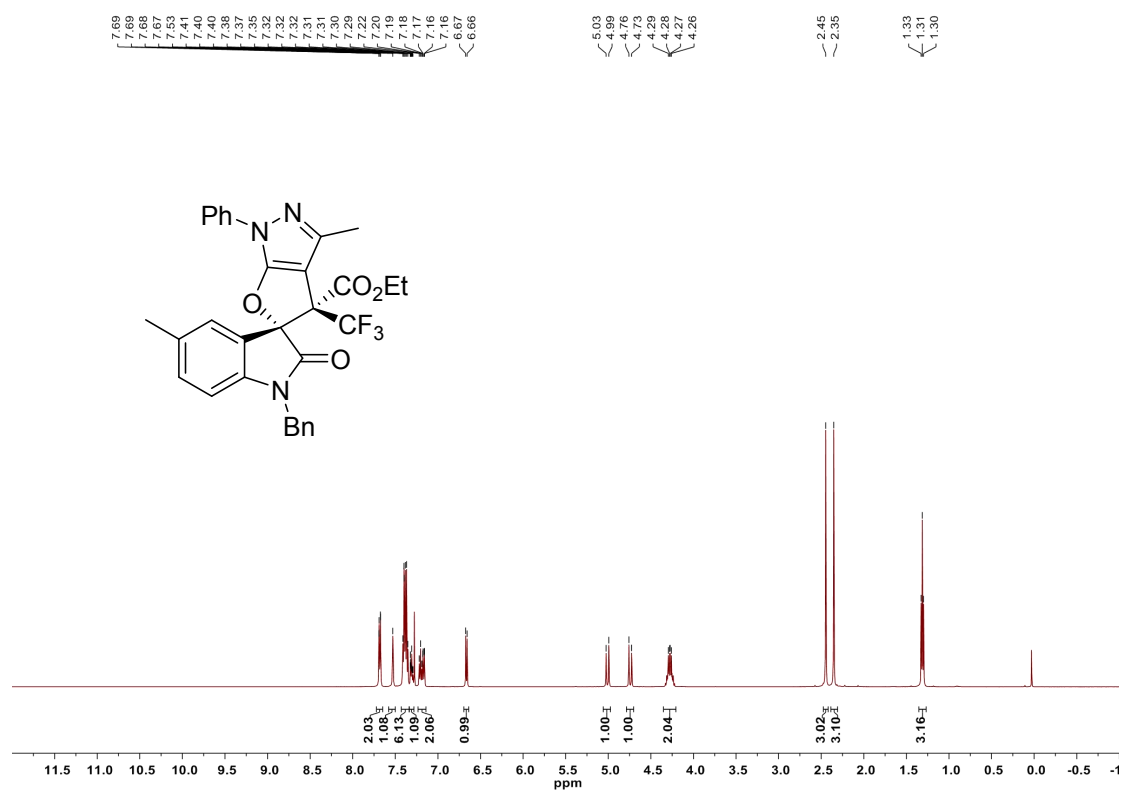

### <sup>13</sup>C NMR spectrum of 4i (CDCl<sub>3</sub>, 125 MHz)

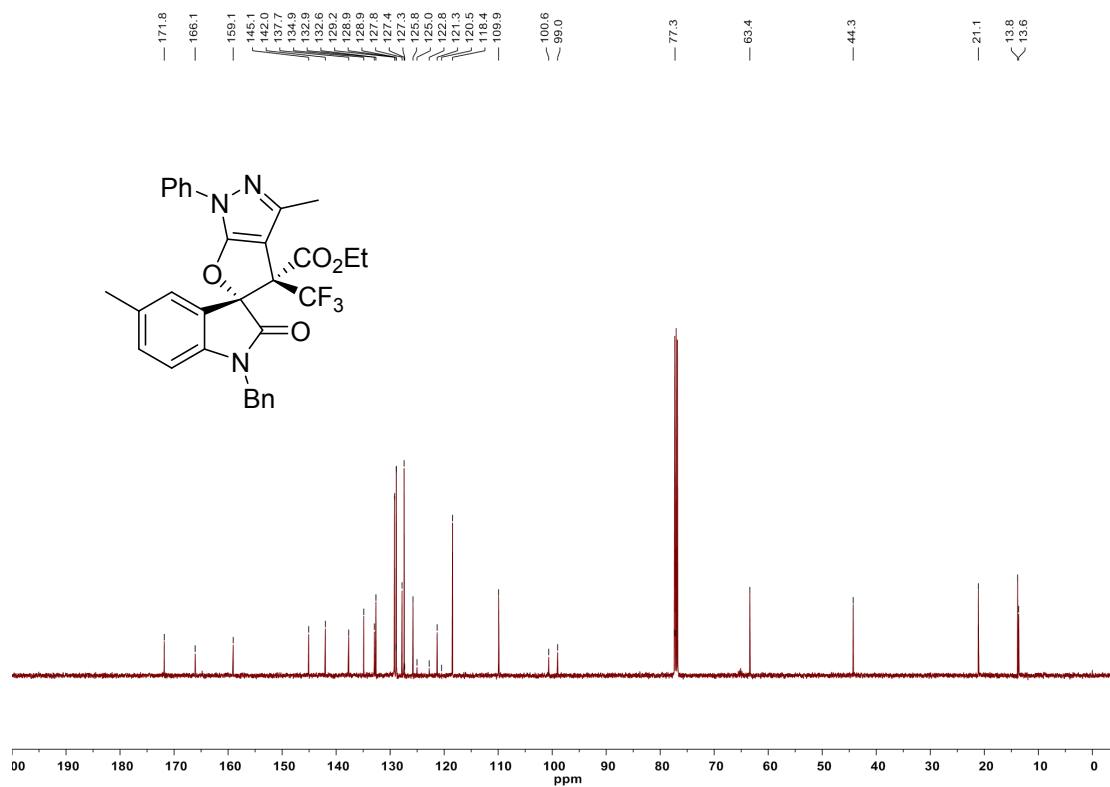

## HPLC chromatograms of 4i

### 4i-rac

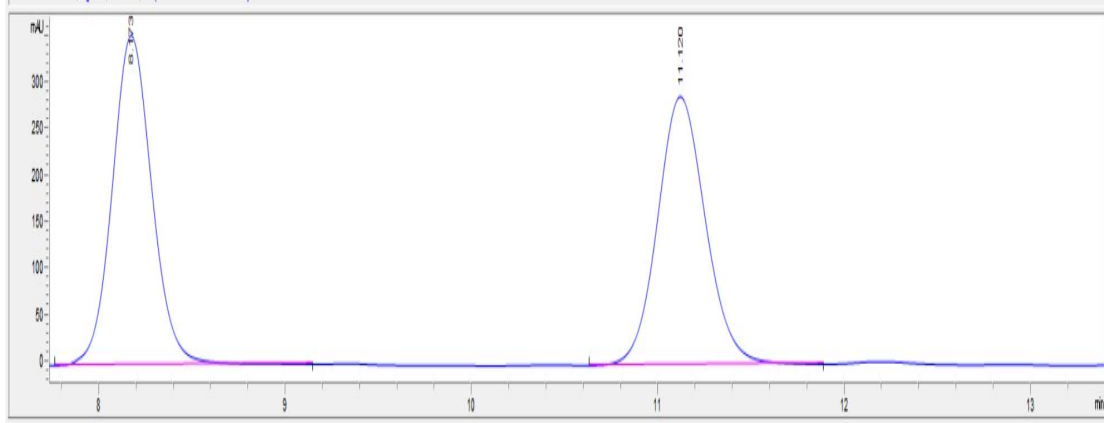

| # | 时间    | 峰面积    | 峰高    | 峰宽     | 对称因子  | 峰面积 %  | 类型 |
|---|-------|--------|-------|--------|-------|--------|----|
| 1 | 8.173 | 5289.6 | 356   | 0.2294 | 0.877 | 50.412 | BB |
| 2 | 11.12 | 5203.1 | 289.8 | 0.2774 | 0.868 | 49.588 | BB |

### 4i-chr

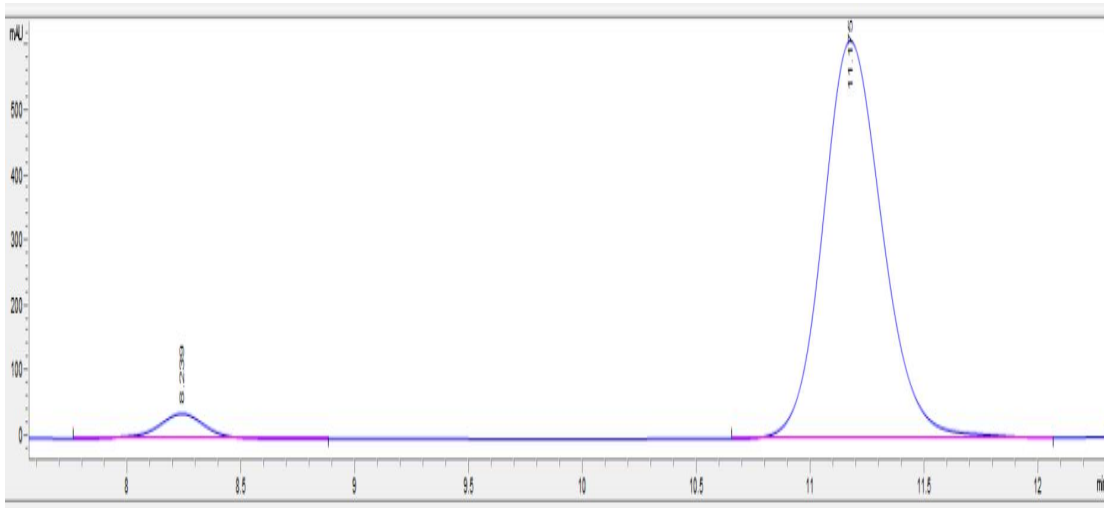

| # | 时间     | 峰面积     | 峰高   | 峰宽     | 对称因子  | 峰面积 %  | 类型 |
|---|--------|---------|------|--------|-------|--------|----|
| 1 | 8.239  | 560.9   | 38.6 | 0.2216 | 1.038 | 4.824  | BB |
| 2 | 11.175 | 11065.1 | 611  | 0.2793 | 0.825 | 95.176 | BB |

### <sup>1</sup>H NMR spectrum of 4j (CDCl<sub>3</sub>, 500 MHz)

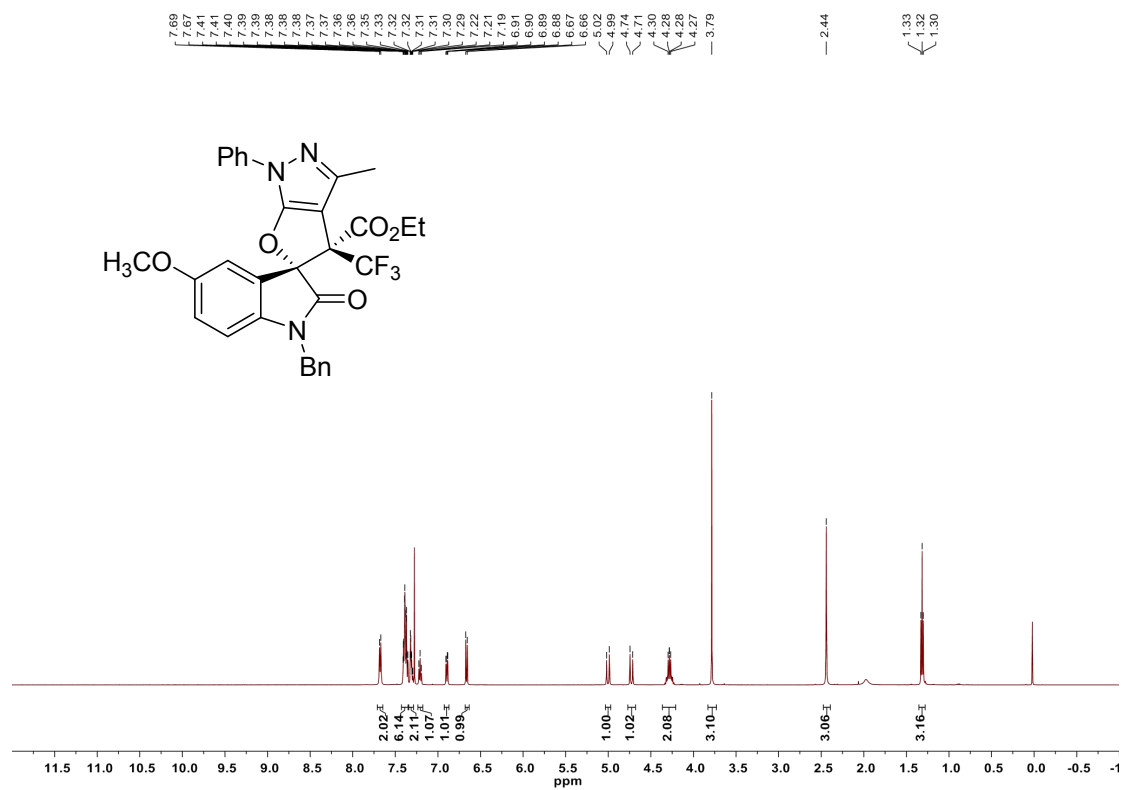

### <sup>13</sup>C NMR spectrum of 4j (CDCl<sub>3</sub>, 125 MHz)

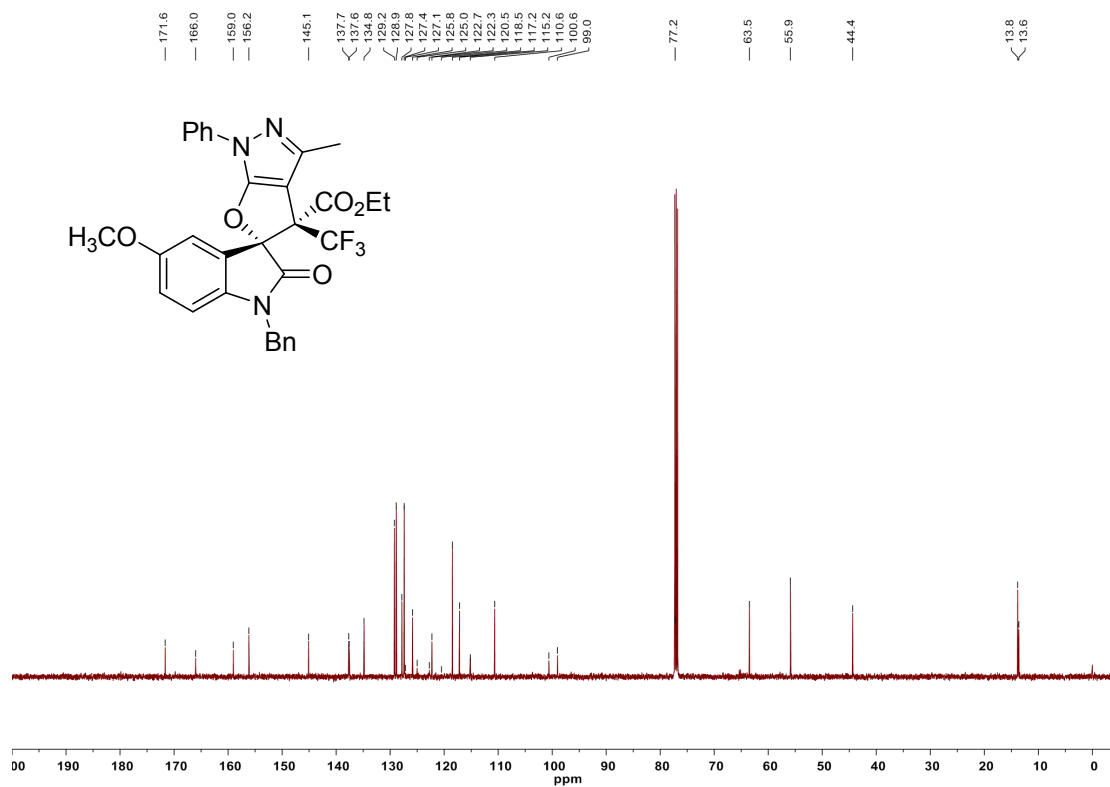

## HPLC chromatograms of 4j

### 4j-rac

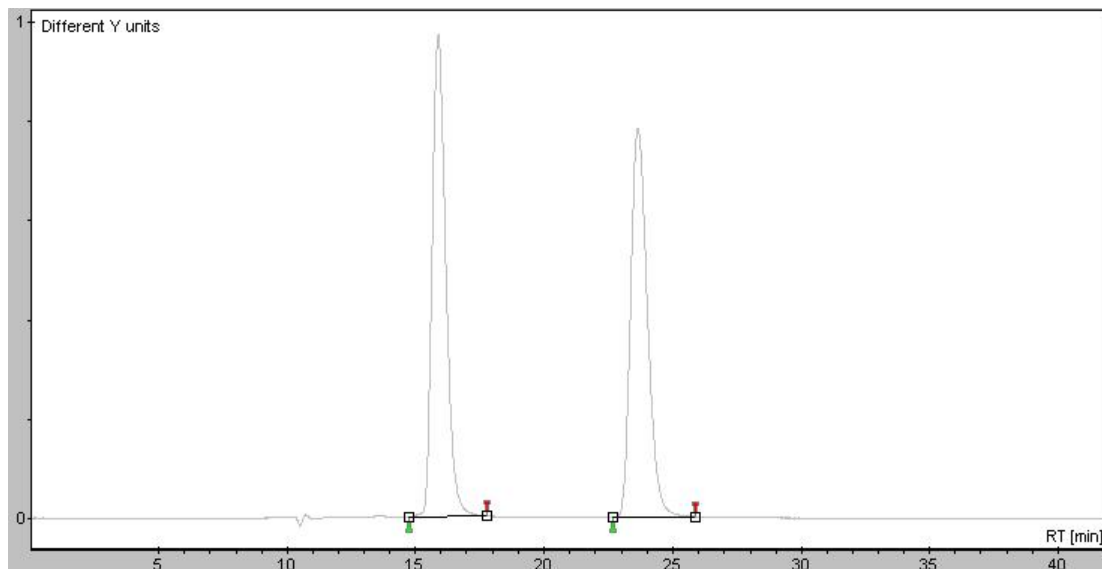

| # | Start time[min] | Time[min] | End time[min] | Area%  |
|---|-----------------|-----------|---------------|--------|
| 1 | 14.748          | 15.892    | 17.779        | 50.297 |
| 2 | 22.675          | 23.638    | 25.881        | 49.703 |

### 4j-chr

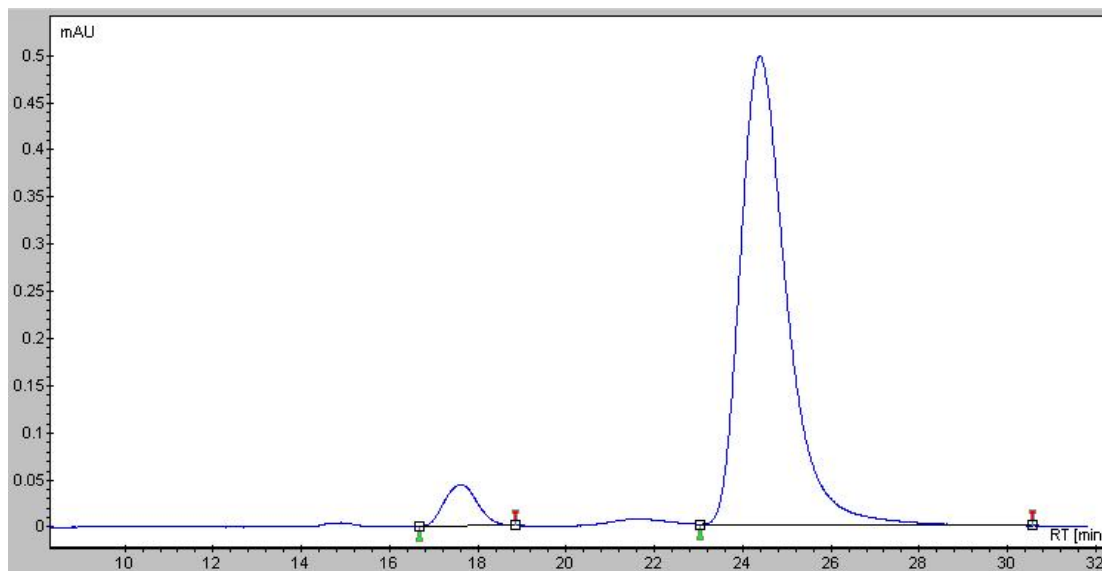

| # | Start time[min] | Time[min] | End time[min] | Area%  |
|---|-----------------|-----------|---------------|--------|
| 1 | 16.665          | 17.612    | 18.839        | 5.951  |
| 2 | 23.050          | 24.385    | 30.574        | 94.049 |

**<sup>1</sup>H NMR spectrum of 4k (CDCl<sub>3</sub>, 500 MHz)**

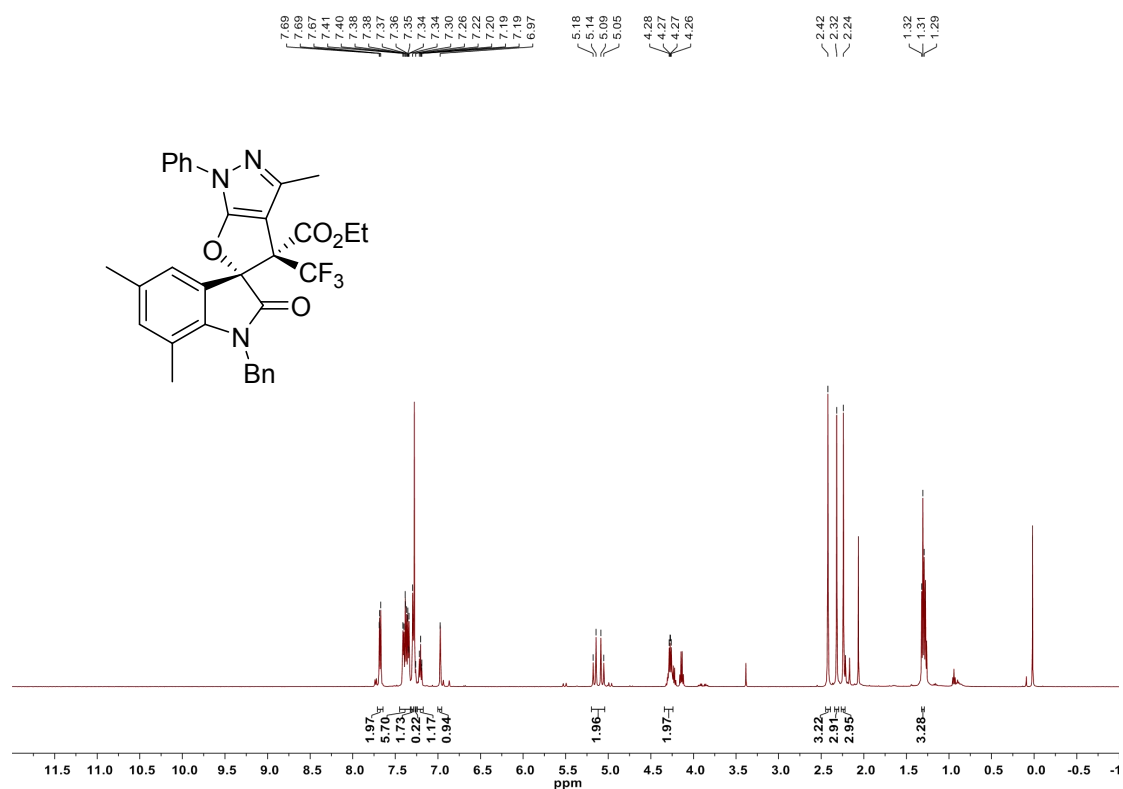

**<sup>13</sup>C NMR spectrum of 4k (CDCl<sub>3</sub>, 125 MHz)**

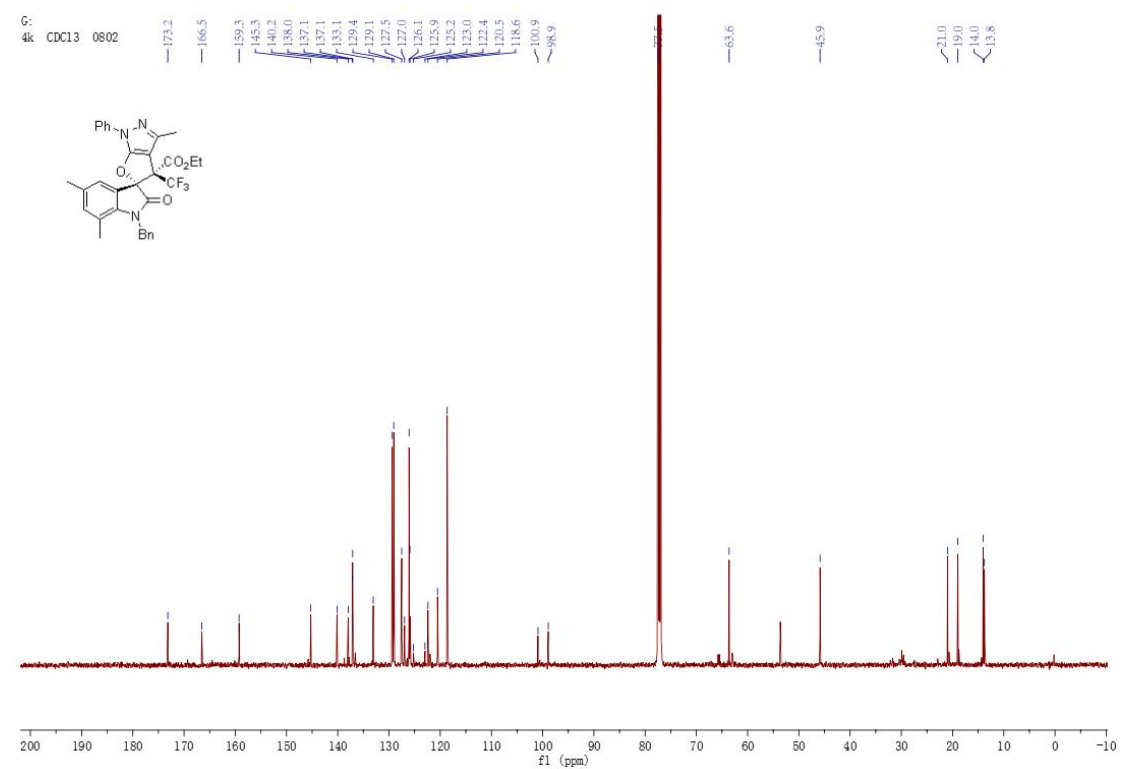

## HPLC chromatograms of 4k

### 4k-rac

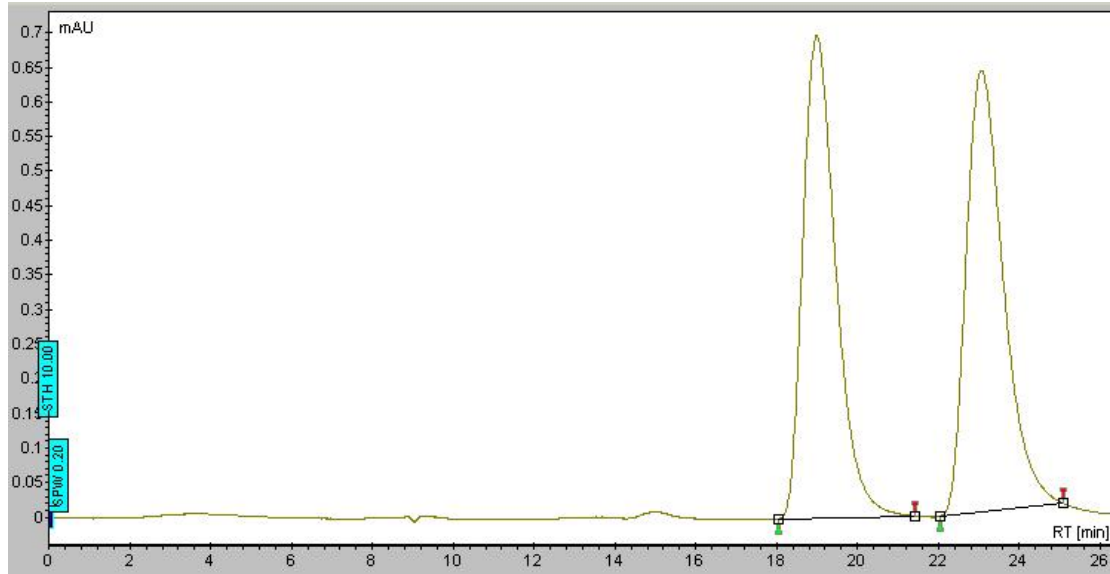

| # | Start time[min] | Time[min] | End time[min] | Area%  |
|---|-----------------|-----------|---------------|--------|
| 1 | 18.045          | 18.999    | 21.419        | 49.165 |
| 2 | 22.042          | 23.052    | 25.086        | 50.835 |

### 4k-chr

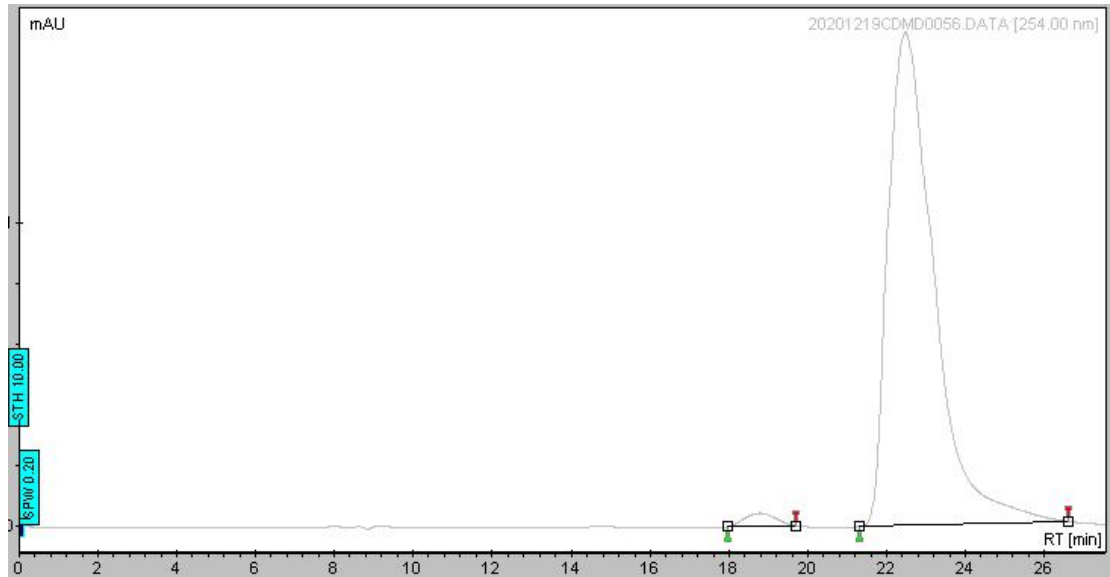

| # | Start time[min] | Time[min] | End time[min] | Area%  |
|---|-----------------|-----------|---------------|--------|
| 1 | 17.973          | 18.785    | 19.701        | 1.750  |
| 2 | 21.314          | 22.465    | 26.613        | 98.250 |



**<sup>1</sup>H NMR spectrum of 4l (CDCl<sub>3</sub>, 500 MHz)**

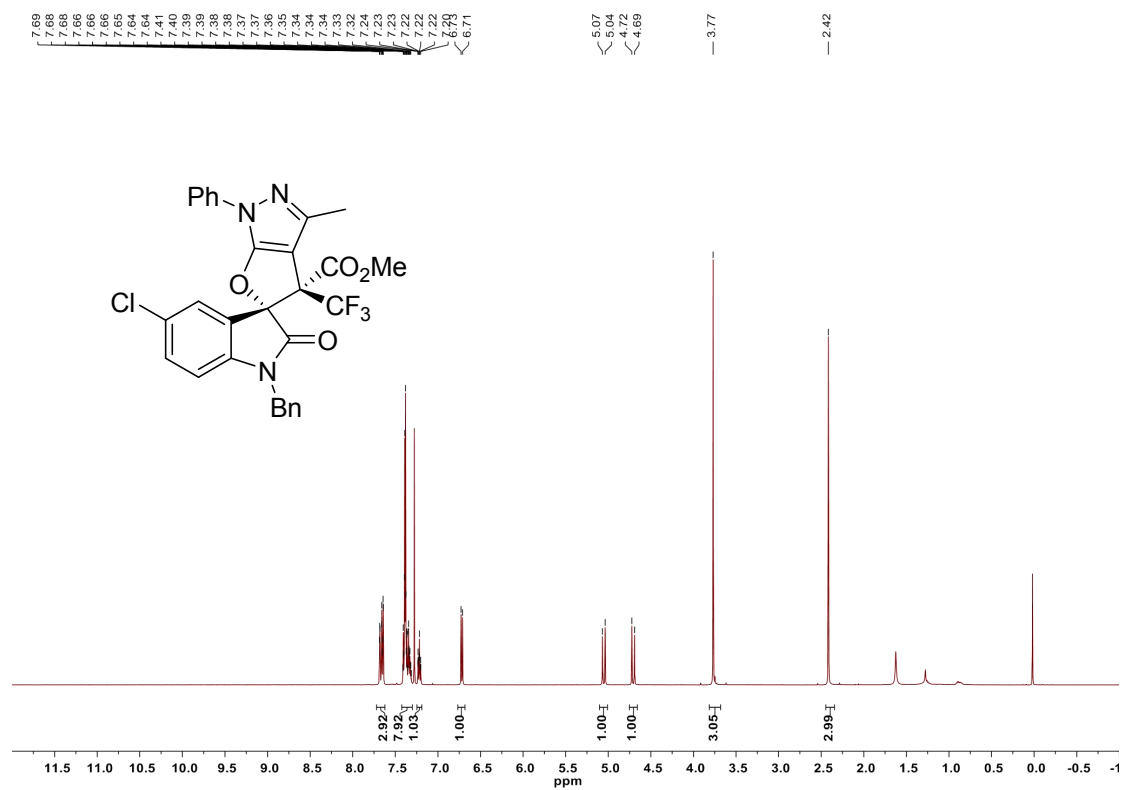

**<sup>13</sup>C NMR spectrum of 4l (CDCl<sub>3</sub>, 125 MHz)**

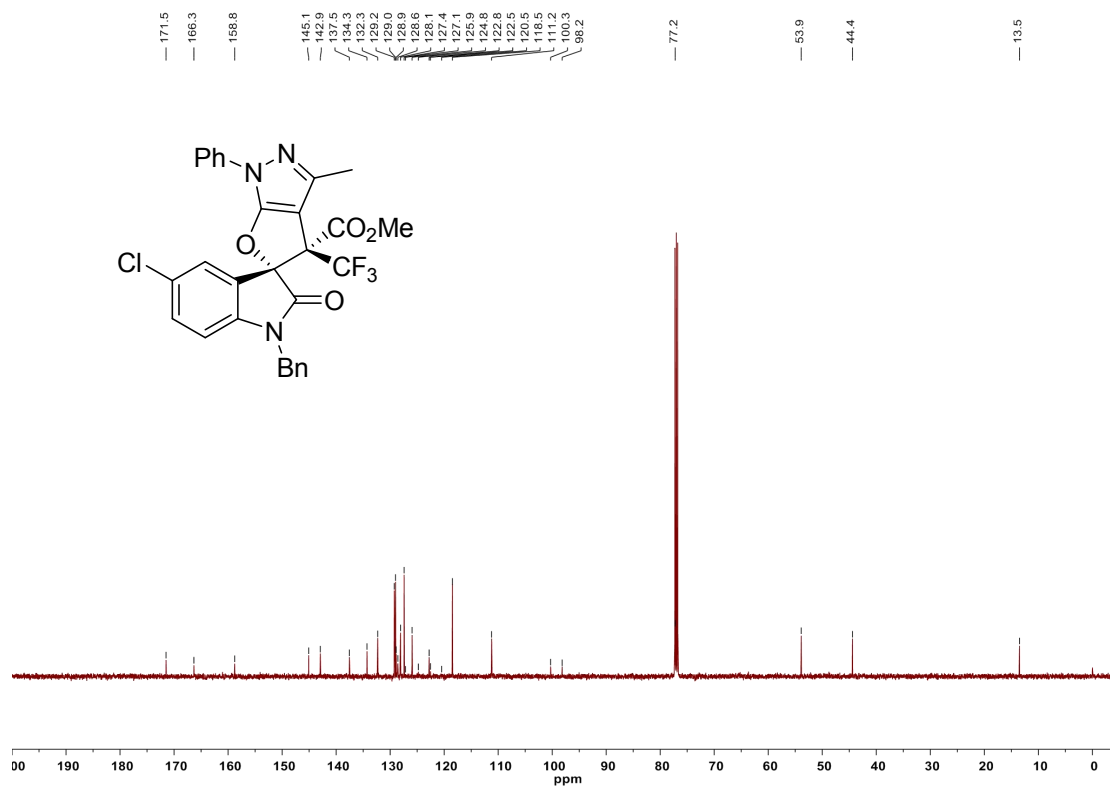

## HPLC chromatograms of 4l

### 4l-rac

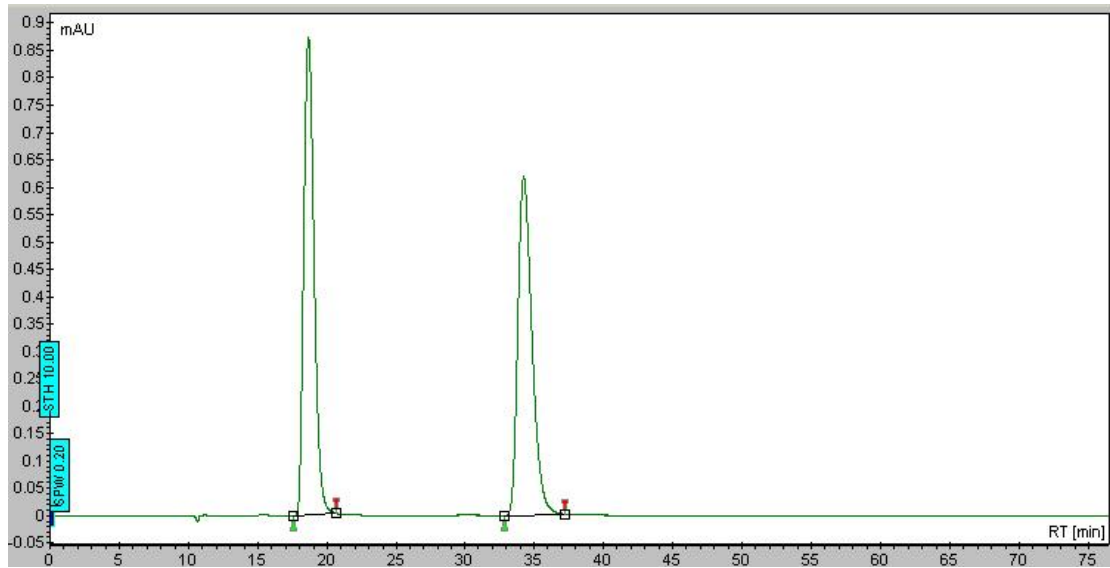

| # | Start time[min] | Time[min] | End time[min] | Area%  |
|---|-----------------|-----------|---------------|--------|
| 1 | 17.585          | 18.673    | 20.675        | 50.675 |
| 2 | 32.825          | 34.214    | 37.194        | 49.325 |

### 4l-chr

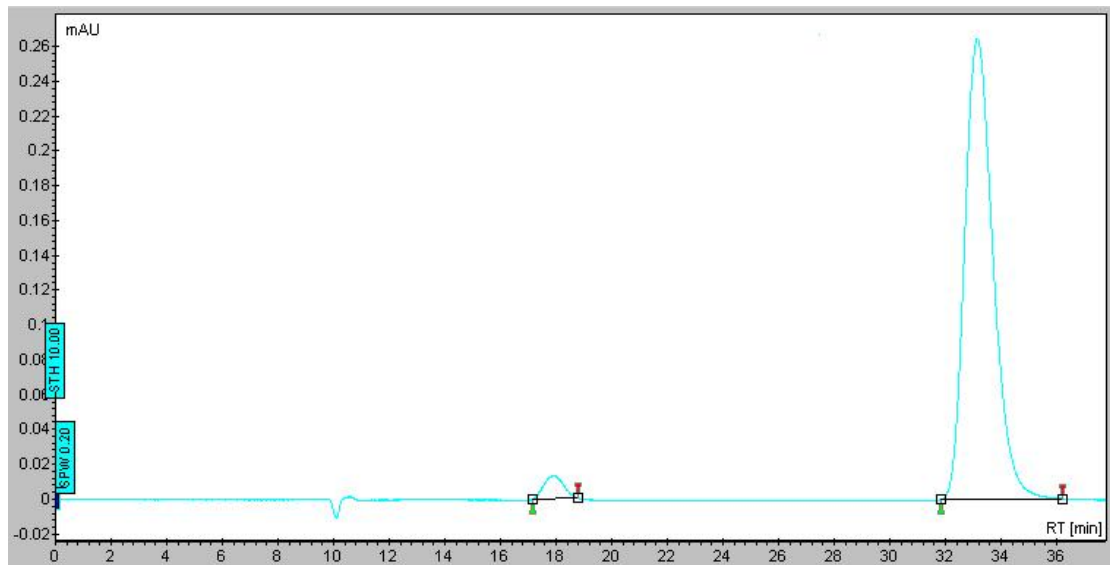

| # | Start time[min] | Time[min] | End time[min] | Area%  |
|---|-----------------|-----------|---------------|--------|
| 1 | 17.151          | 17.892    | 18.781        | 3.400  |
| 2 | 31.829          | 33.118    | 36.195        | 96.600 |

**<sup>1</sup>H NMR spectrum of 4m (CDCl<sub>3</sub>, 500 MHz)**

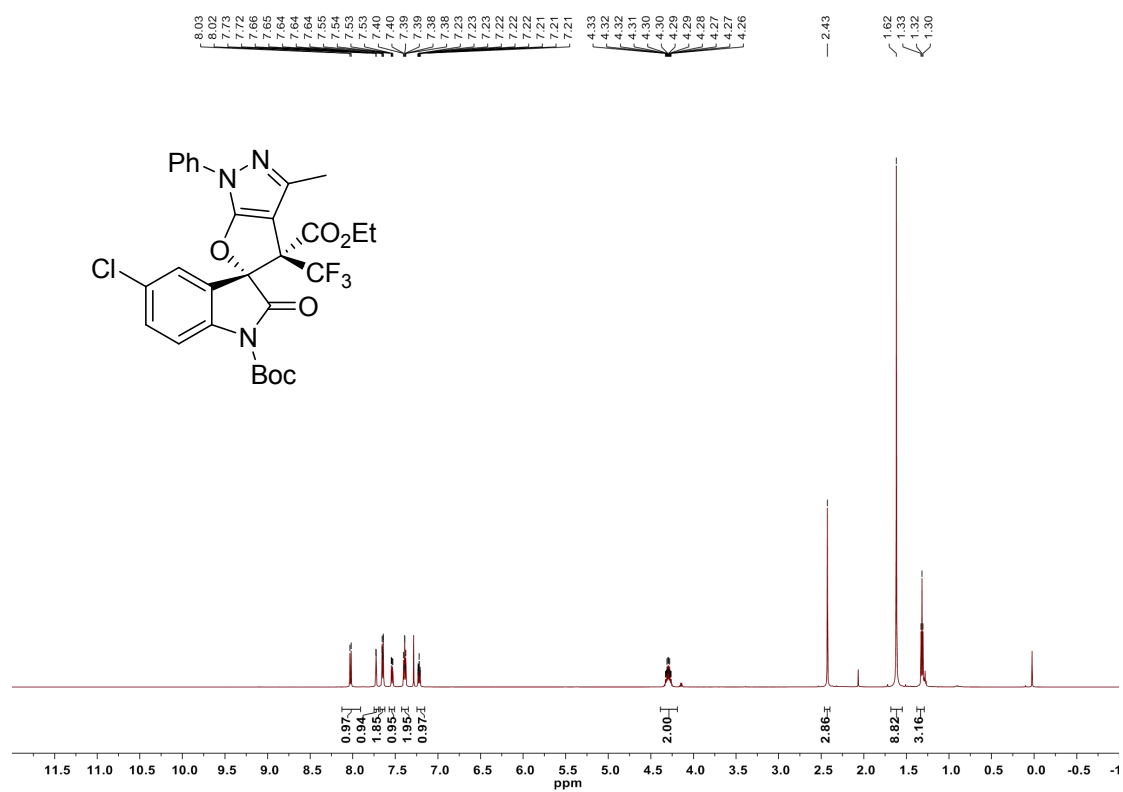

**<sup>13</sup>C NMR spectrum of 4m (CDCl<sub>3</sub>, 125 MHz)**

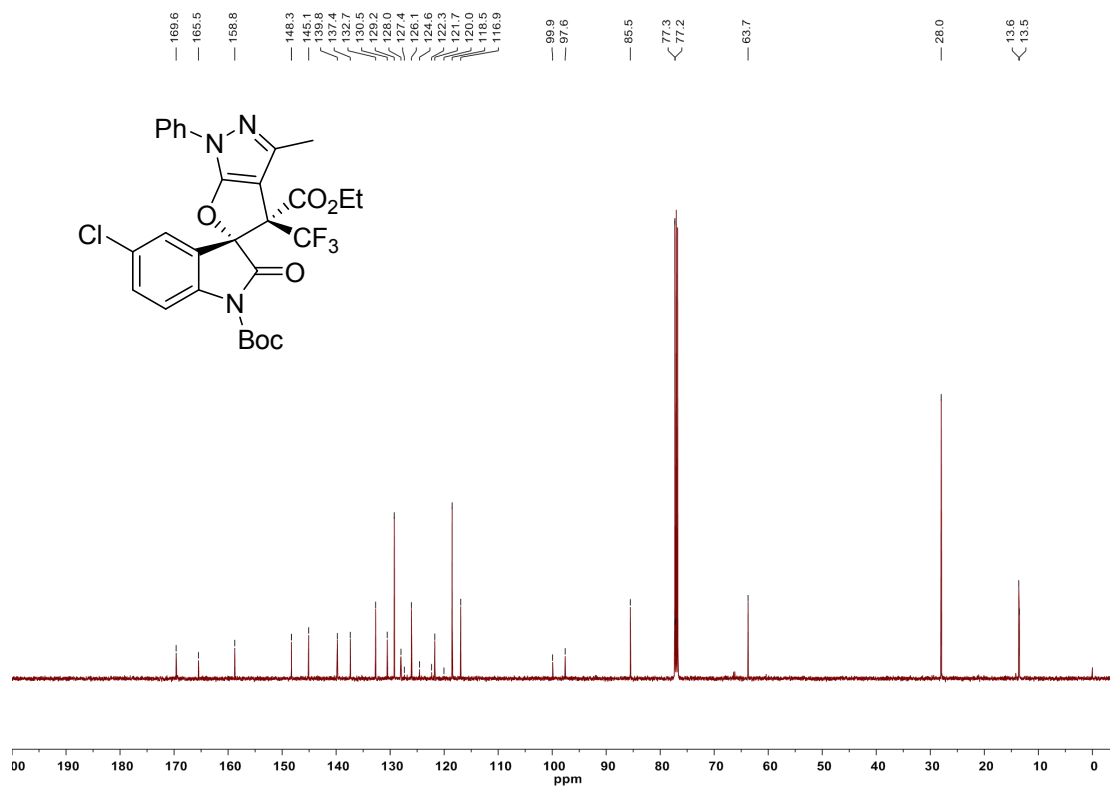

## HPLC chromatograms of 4m

### 4m-rac

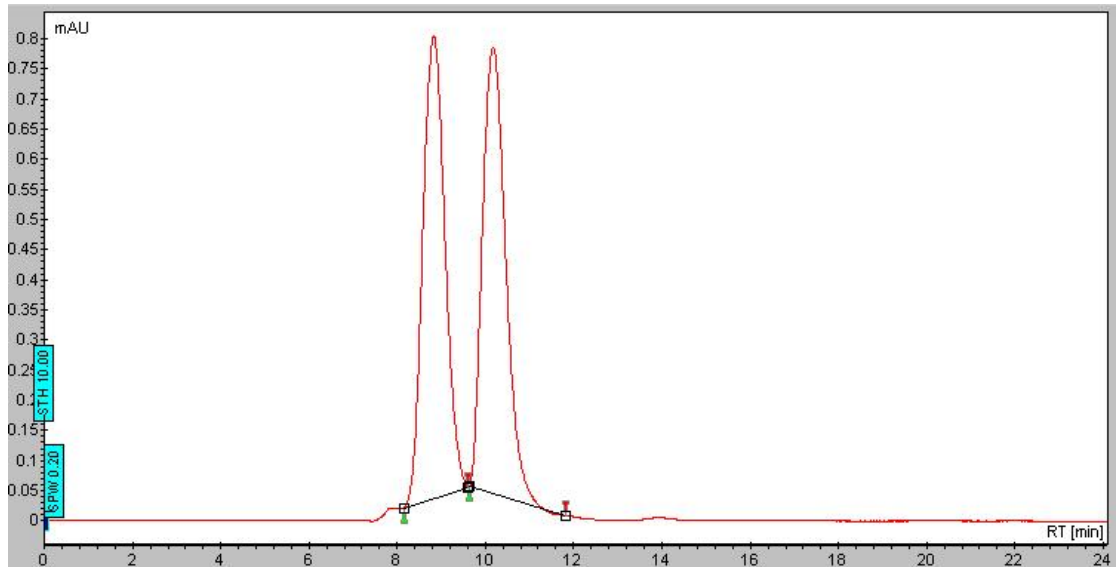

| # | Start time[min] | Time[min] | End time[min] | Area%  |
|---|-----------------|-----------|---------------|--------|
| 1 | 8.159           | 8.826     | 9.602         | 50.052 |
| 2 | 9.636           | 10.173    | 11.818        | 49.948 |

### 4m-chr

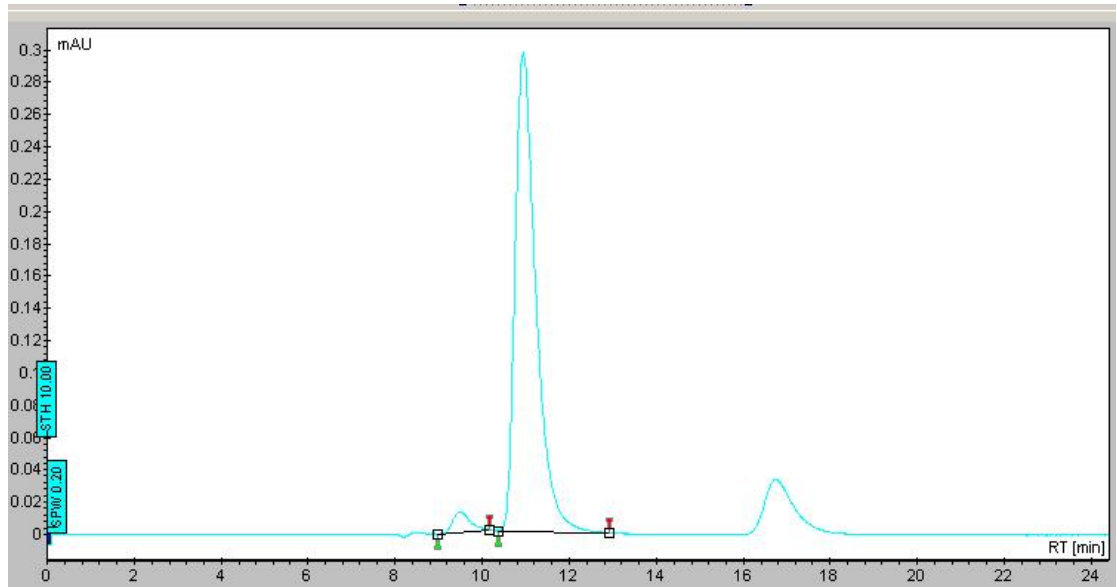

| # | Start time[min] | Time[min] | End time[min] | Area%  |
|---|-----------------|-----------|---------------|--------|
| 1 | 8.976           | 9.479     | 10.167        | 3.317  |
| 2 | 10.371          | 10.946    | 12.921        | 96.683 |

### <sup>1</sup>H NMR spectrum of 4n (CDCl<sub>3</sub>, 500 MHz)

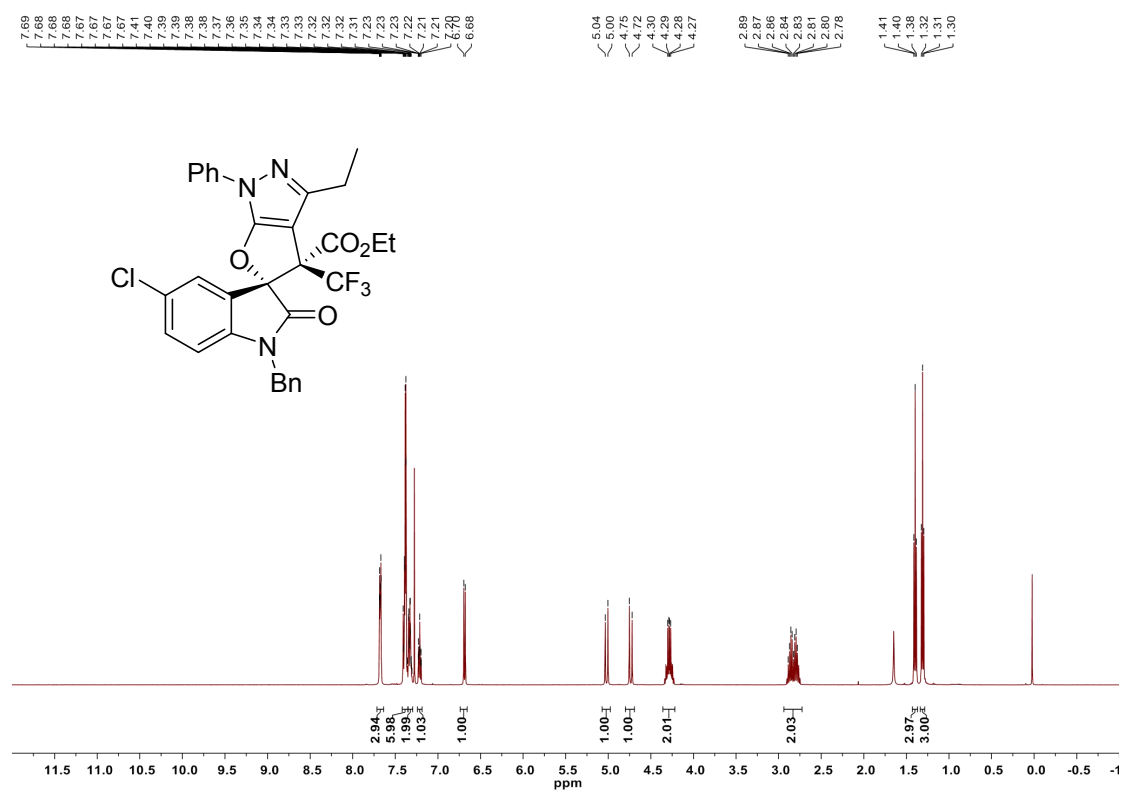

### <sup>13</sup>C NMR spectrum of 4n (CDCl<sub>3</sub>, 125 MHz)

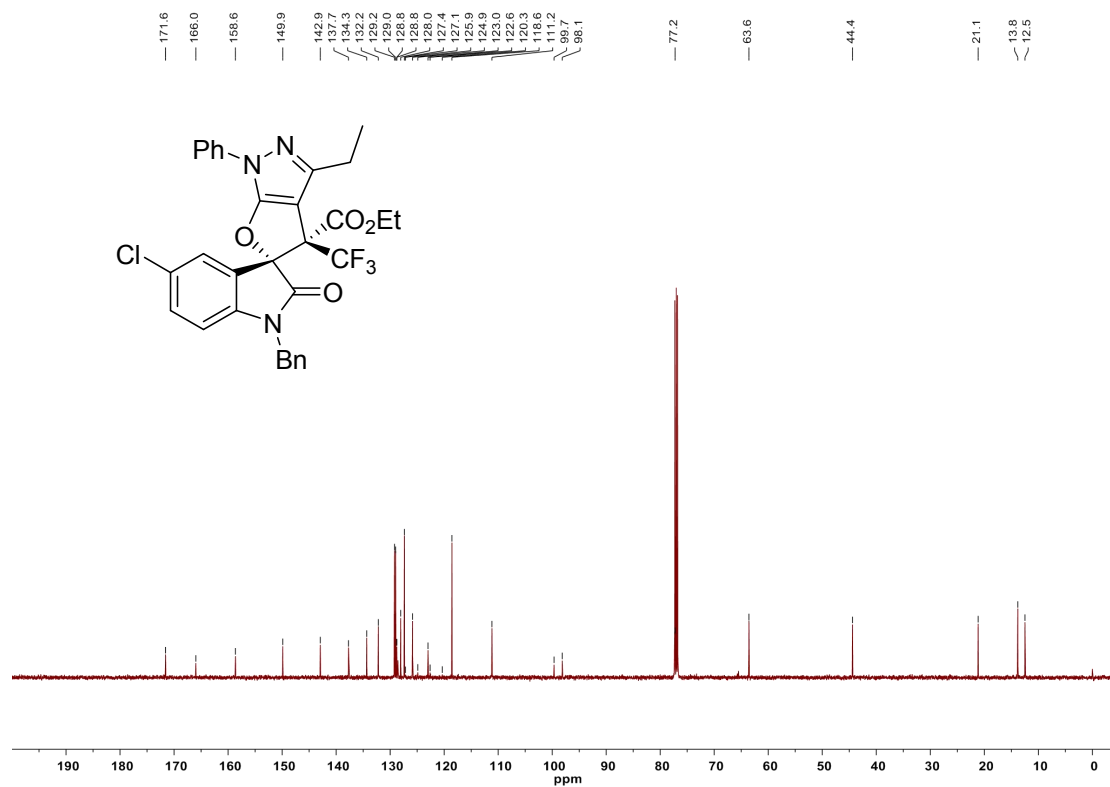

## HPLC chromatograms of 4n

### 4n-rac

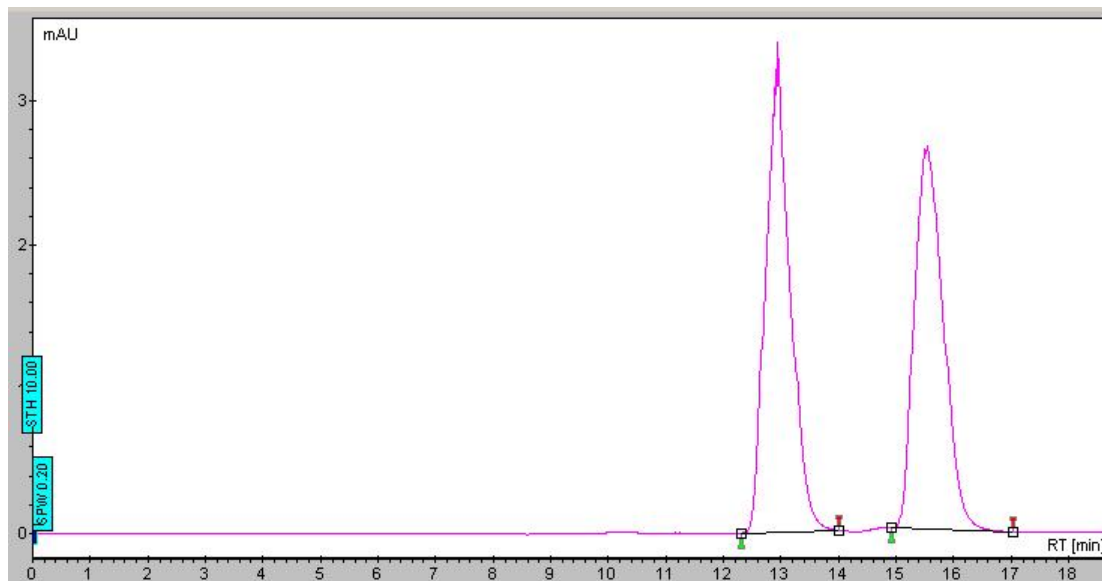

| # | Start time[min] | Time[min] | End time[min] | Area%  |
|---|-----------------|-----------|---------------|--------|
| 1 | 12.315          | 12.932    | 14.010        | 50.831 |
| 2 | 14.924          | 14.546    | 17.037        | 49.169 |

### 4n-chr

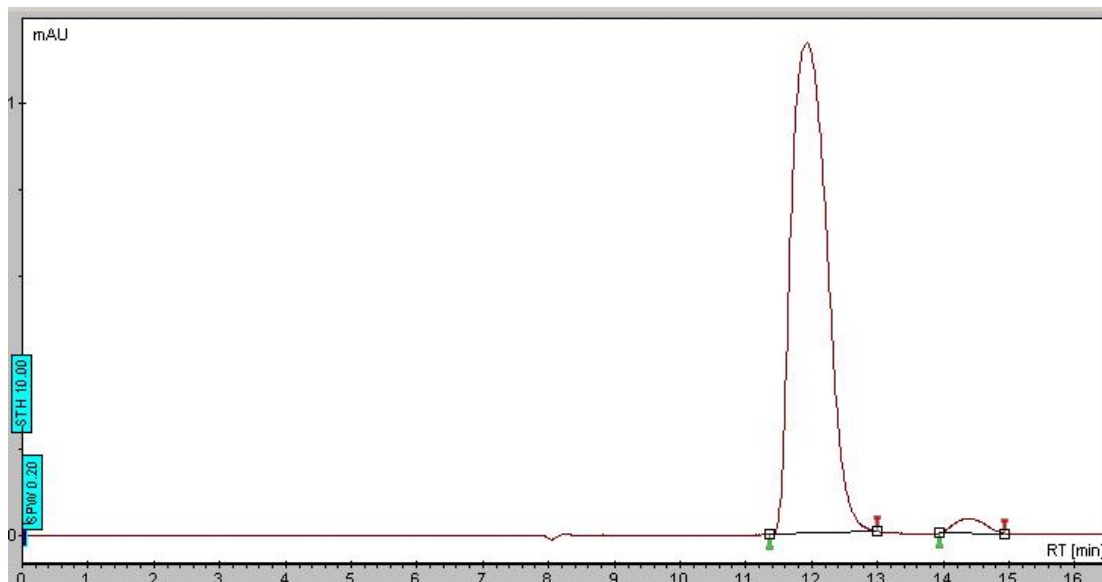

| # | Start time[min] | Time[min] | End time[min] | Area%  |
|---|-----------------|-----------|---------------|--------|
| 1 | 11.359          | 11.932    | 12.995        | 97.475 |
| 2 | 13.939          | 14.386    | 14.930        | 2.525  |

**<sup>1</sup>H NMR spectrum of 4o (CDCl<sub>3</sub>, 500 MHz)**

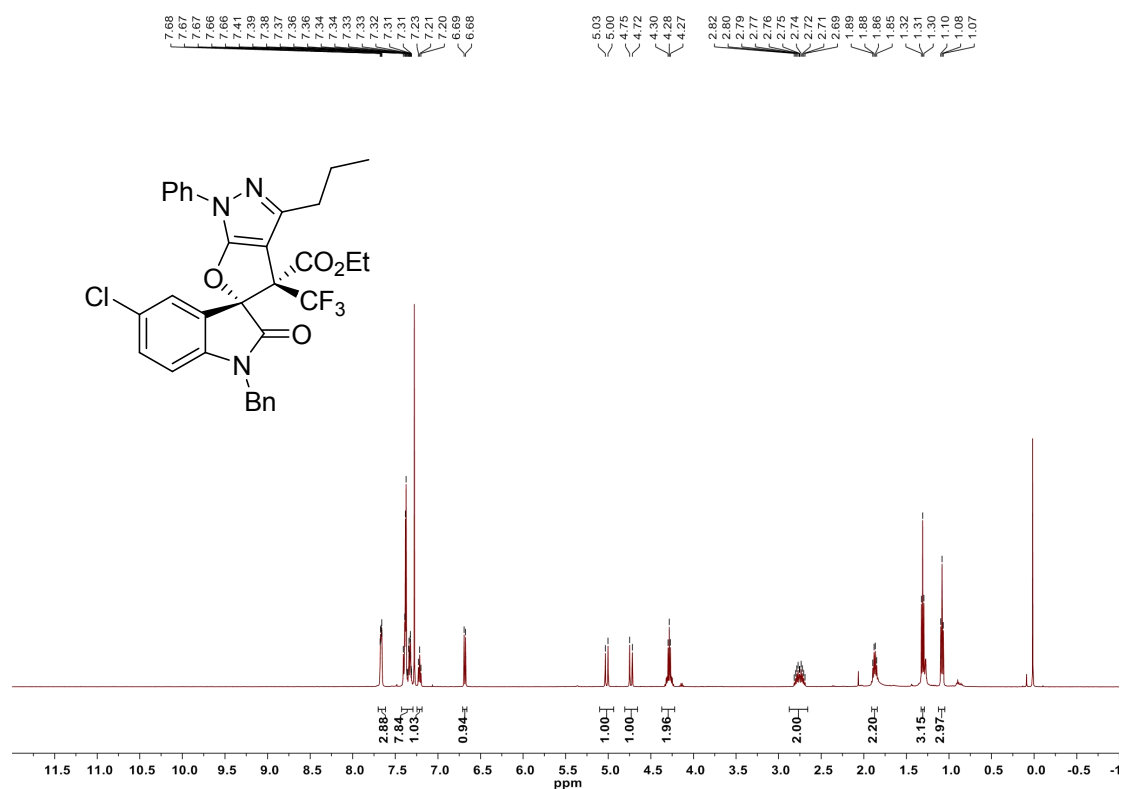

**<sup>13</sup>C NMR spectrum of 4o (CDCl<sub>3</sub>, 125 MHz)**

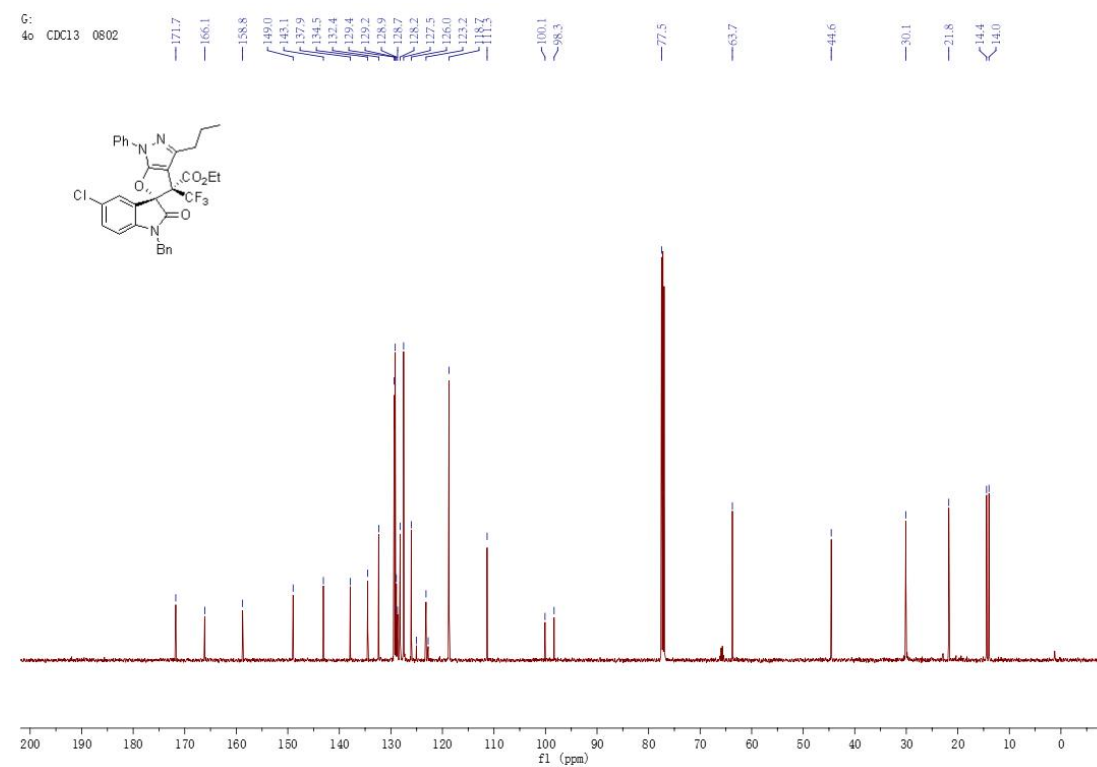

## HPLC chromatograms of 4o

### 4o-rac

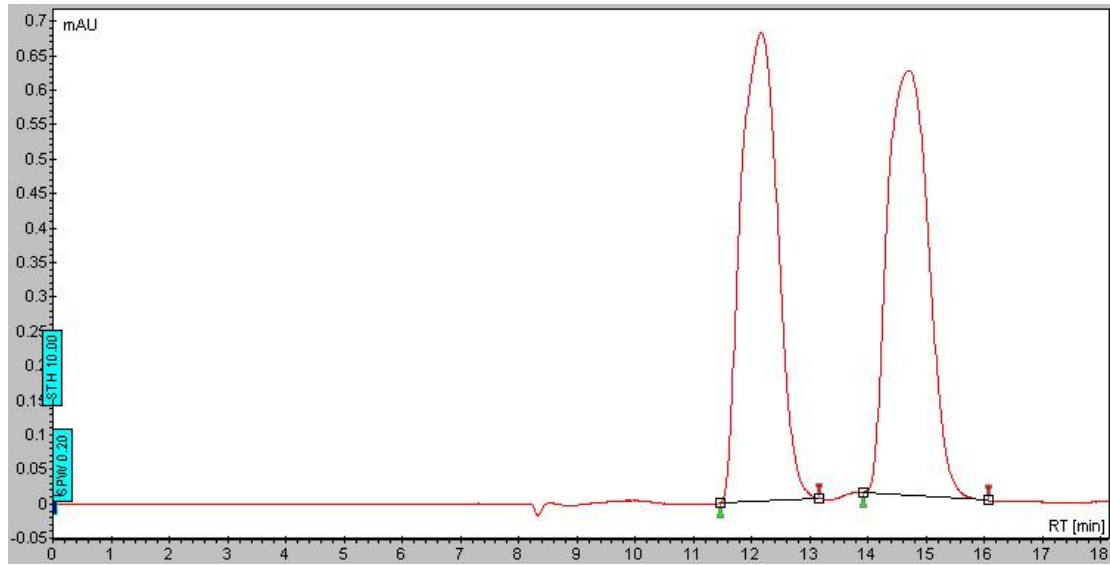

| # | Start time[min] | Time[min] | End time[min] | Area%  |
|---|-----------------|-----------|---------------|--------|
| 1 | 11.465          | 12.159    | 13.161        | 49.732 |
| 2 | 13.920          | 14.706    | 16.071        | 50.268 |

### 4o-chr

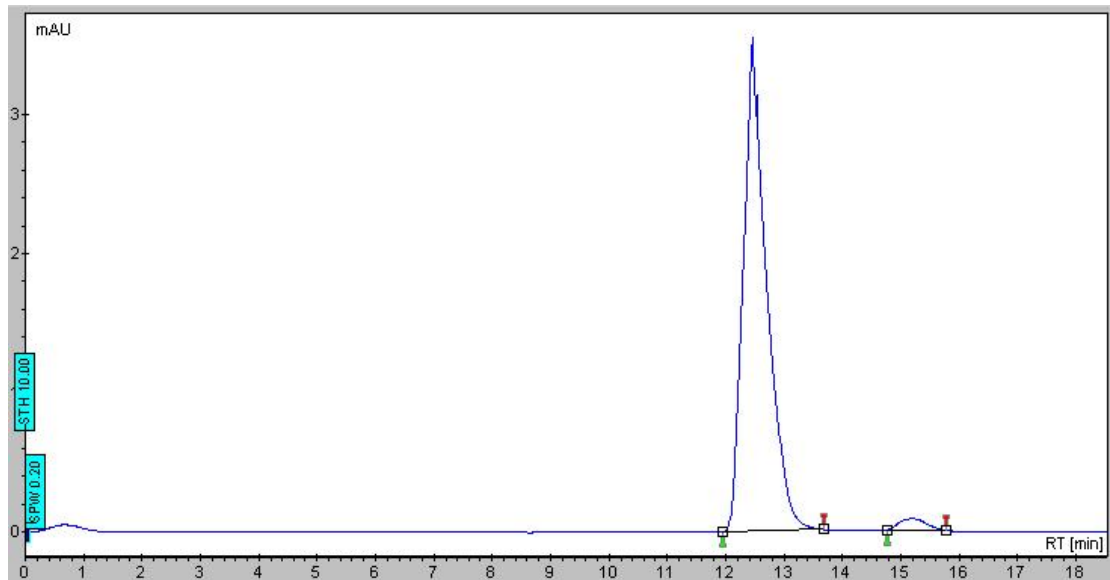

| # | Start time[min] | Time[min] | End time[min] | Area%  |
|---|-----------------|-----------|---------------|--------|
| 1 | 11.951          | 12.466    | 13.684        | 97.335 |
| 2 | 14.770          | 15.186    | 15.779        | 2.665  |



### <sup>1</sup>H NMR spectrum of 4p (CDCl<sub>3</sub>, 500 MHz)

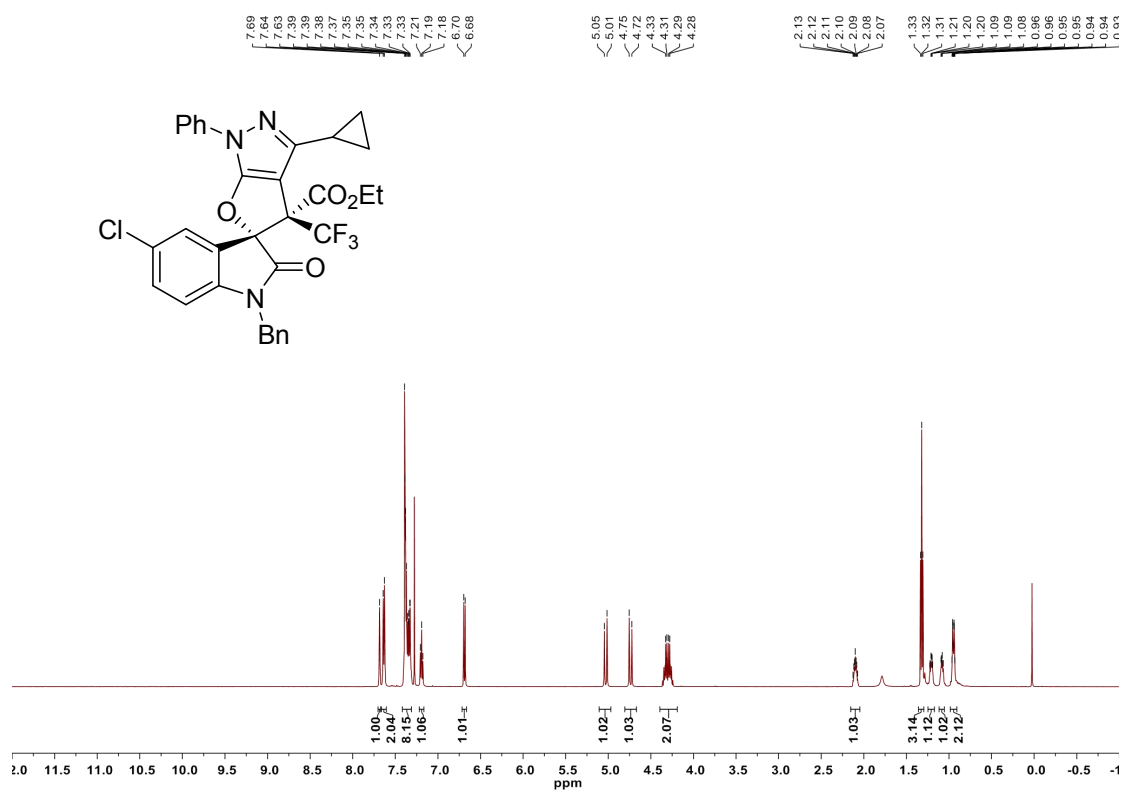

### <sup>13</sup>C NMR spectrum of 4p (CDCl<sub>3</sub>, 125 MHz)

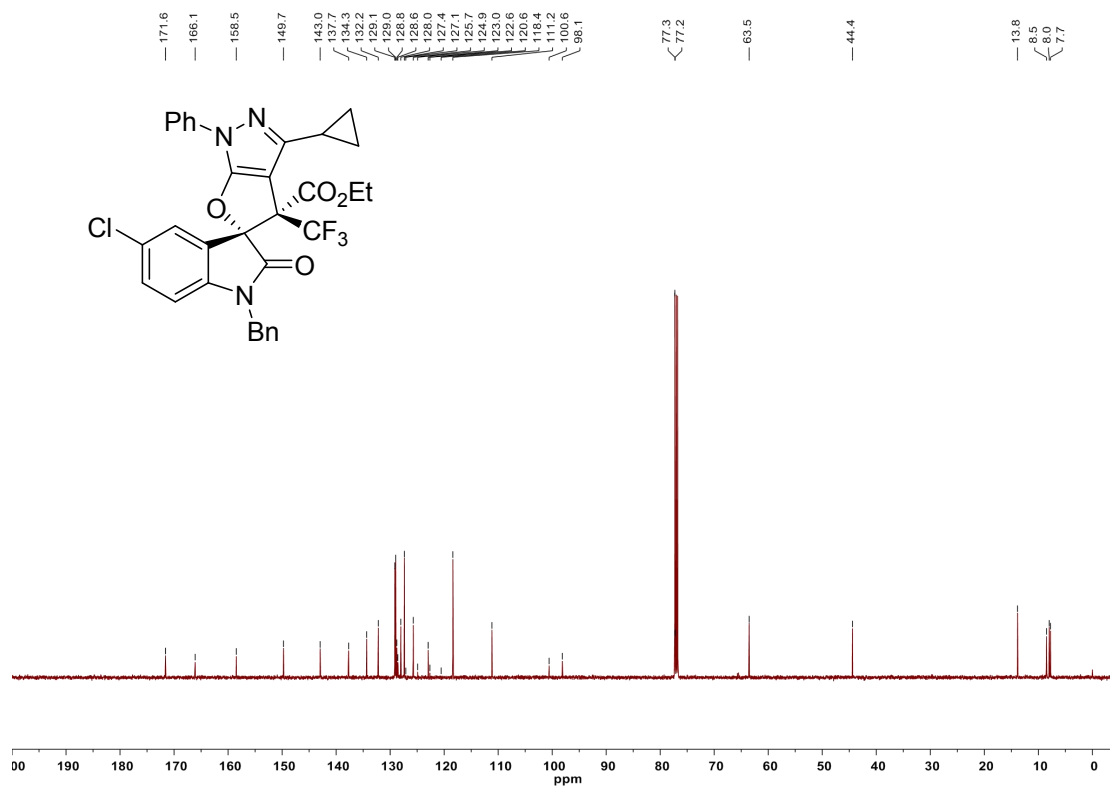

## HPLC chromatograms of 4p

### 4p-rac

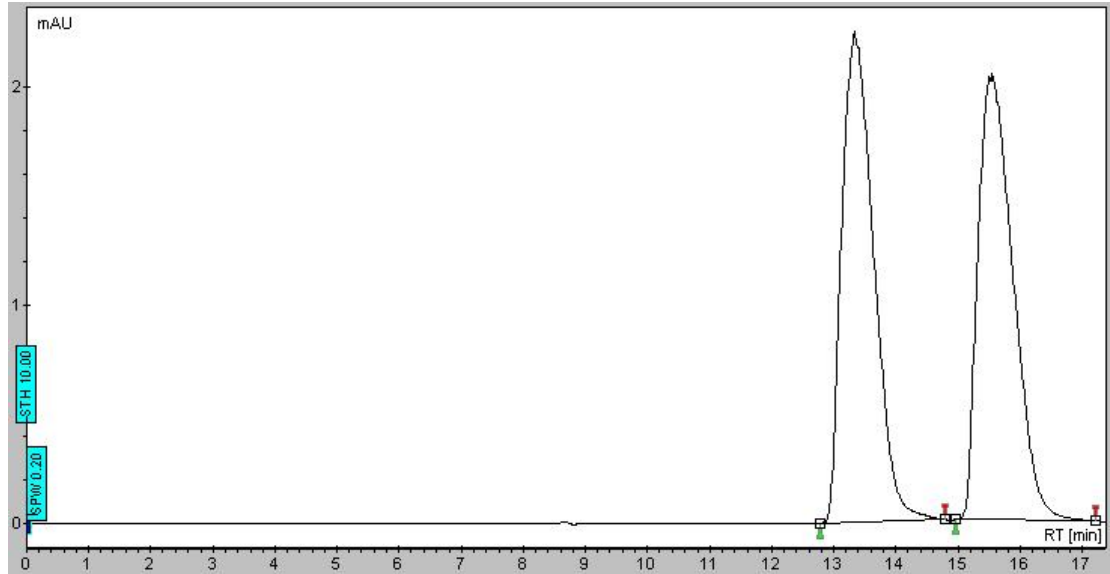

| # | Start time[min] | Time[min] | End time[min] | Area%  |
|---|-----------------|-----------|---------------|--------|
| 1 | 12.779          | 13.332    | 14.792        | 50.036 |
| 2 | 14.962          | 15.532    | 17.217        | 49.964 |

### 4p-chr

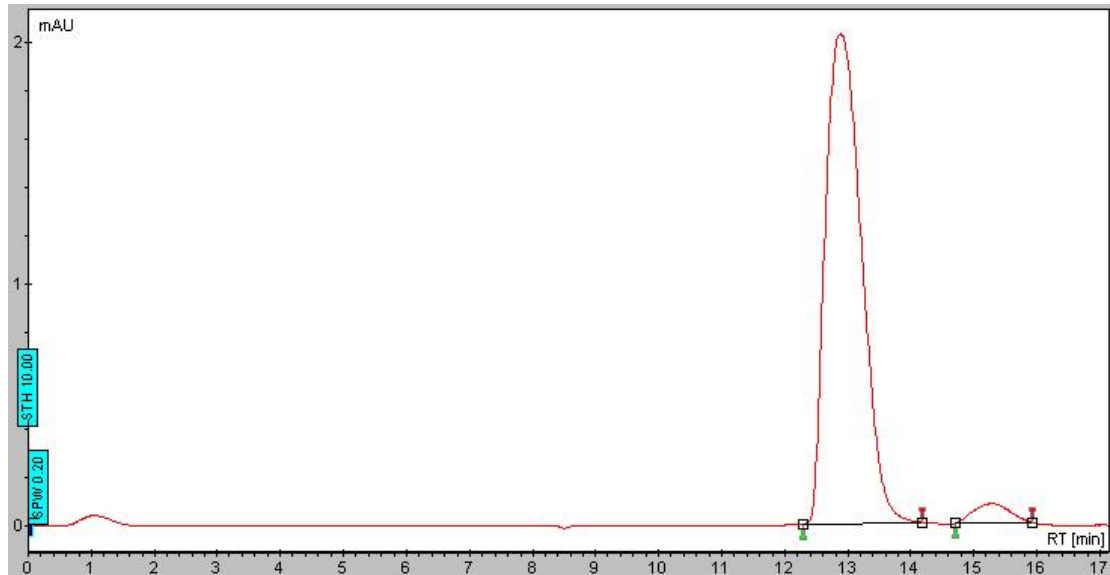

| # | Start time[min] | Time[min] | End time[min] | Area%  |
|---|-----------------|-----------|---------------|--------|
| 1 | 12.292          | 12.892    | 14.181        | 96.150 |
| 2 | 14.707          | 15.292    | 15.927        | 3.850  |

### <sup>1</sup>H NMR spectrum of 4q (CDCl<sub>3</sub>, 500 MHz)

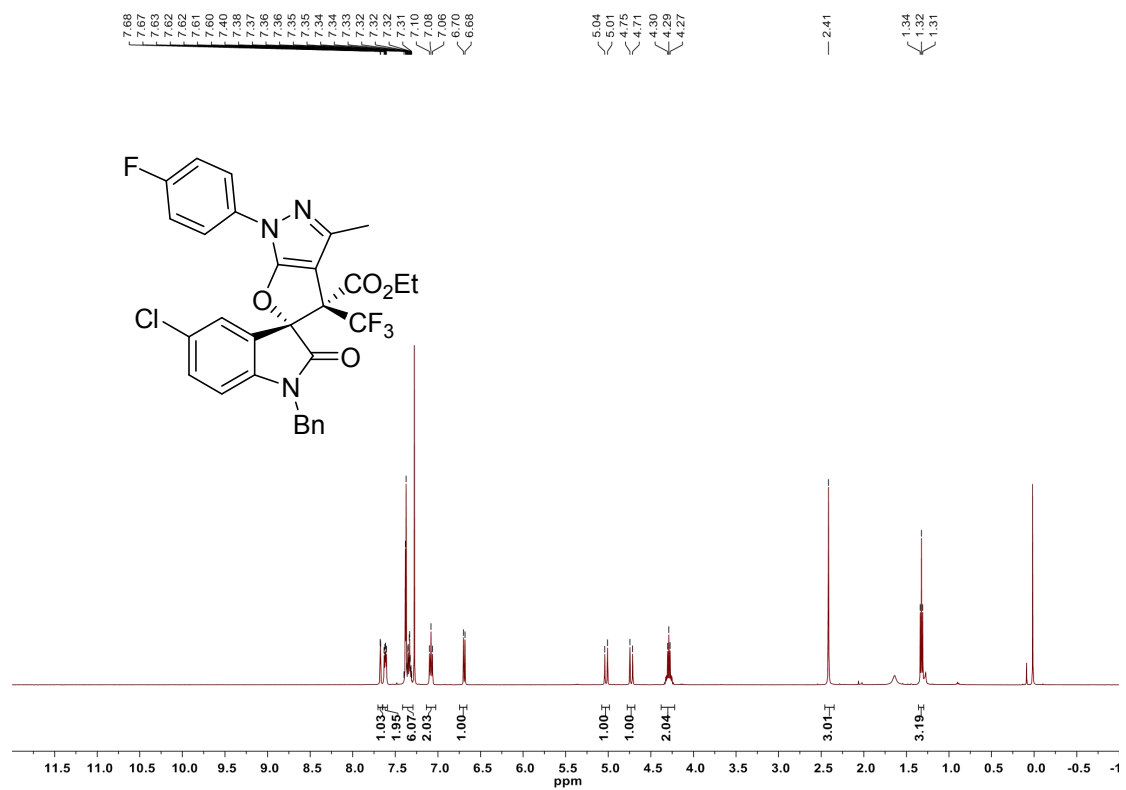

### <sup>13</sup>C NMR spectrum of 4q (CDCl<sub>3</sub>, 125 MHz)

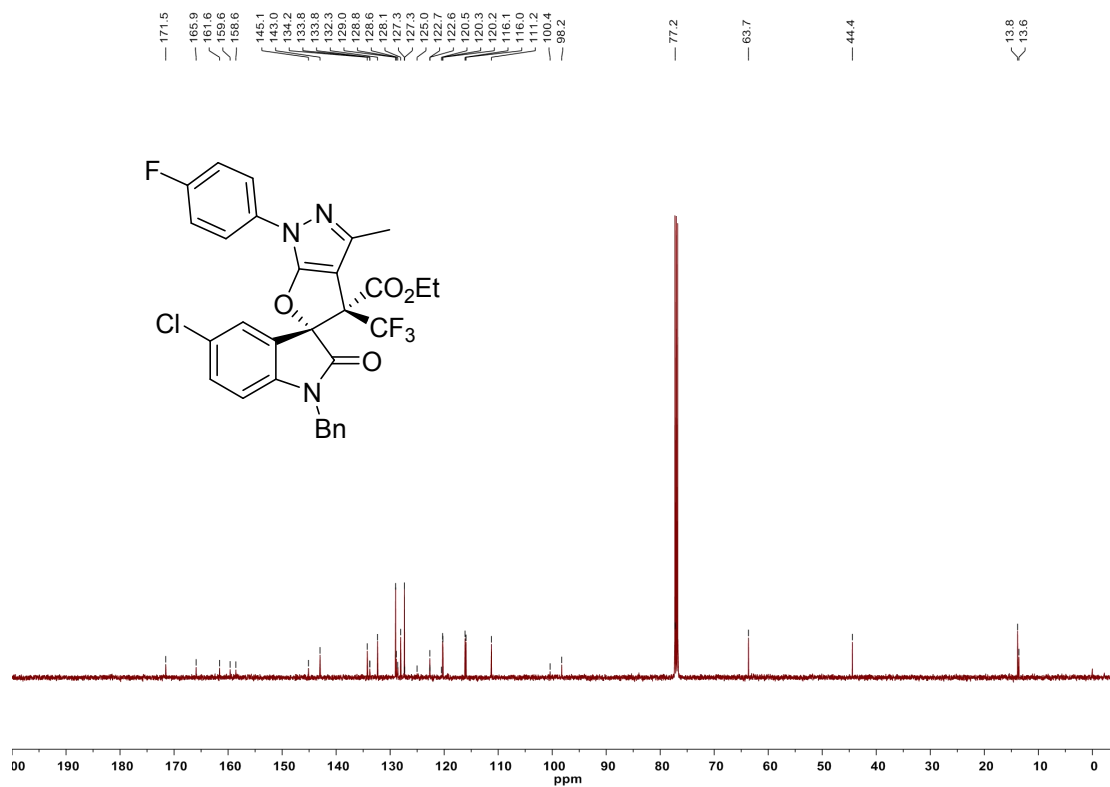

## HPLC chromatograms of 4q

### 4q-rac

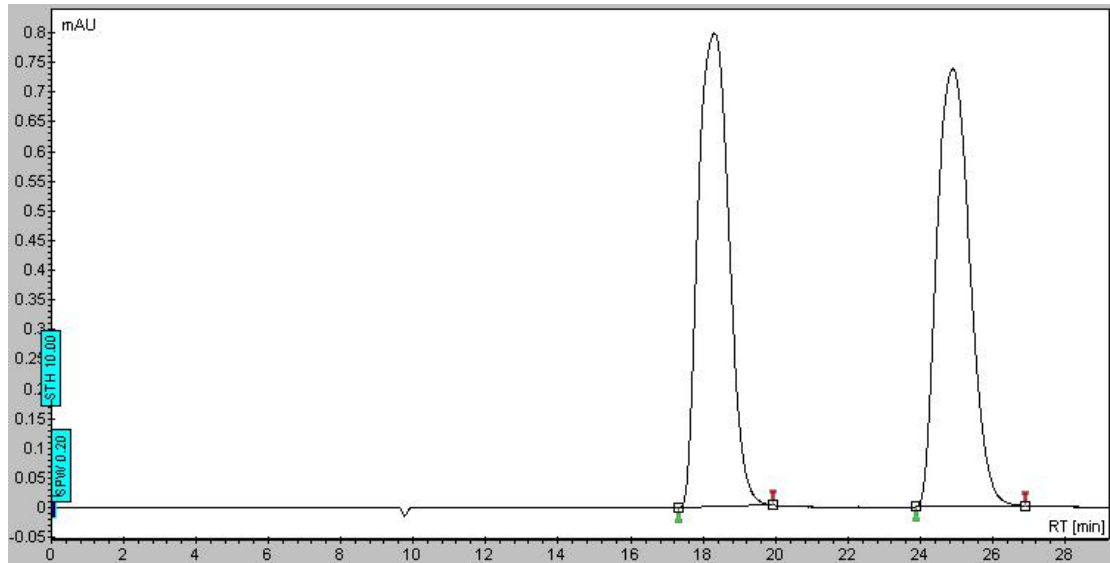

| # | Start time[min] | Time[min] | End time[min] | Area%  |
|---|-----------------|-----------|---------------|--------|
| 1 | 17.324          | 18.319    | 19.933        | 50.131 |
| 2 | 23.887          | 24.905    | 26.903        | 49.869 |

### 4q-chr

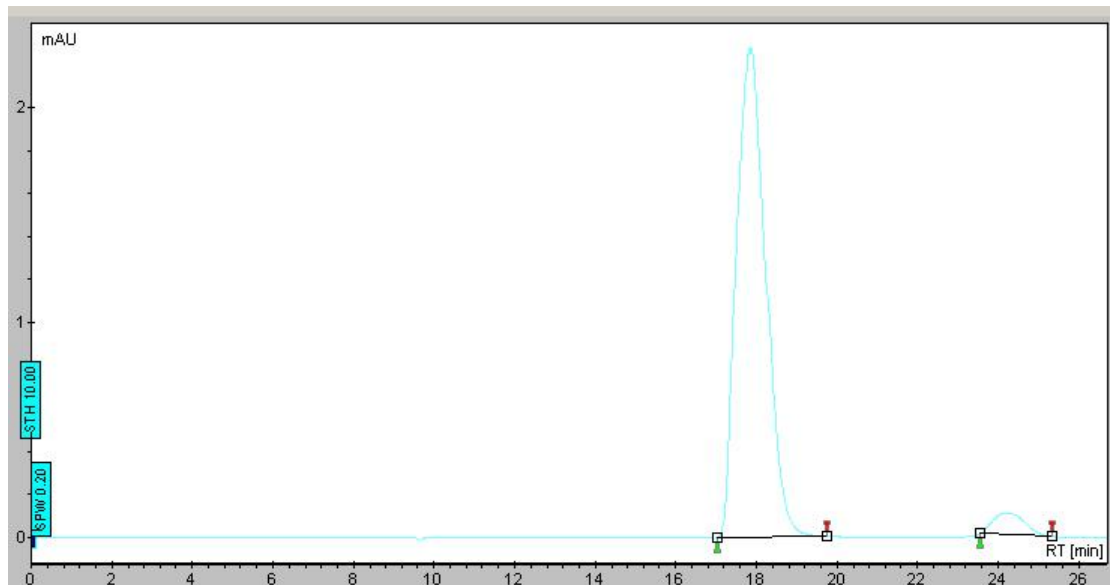

| # | Start time[min] | Time[min] | End time[min] | Area%  |
|---|-----------------|-----------|---------------|--------|
| 1 | 17.031          | 17.852    | 19.751        | 95.337 |
| 2 | 23.552          | 24.252    | 25.341        | 4.663  |

### <sup>1</sup>H NMR spectrum of 4r (CDCl<sub>3</sub>, 500 MHz)

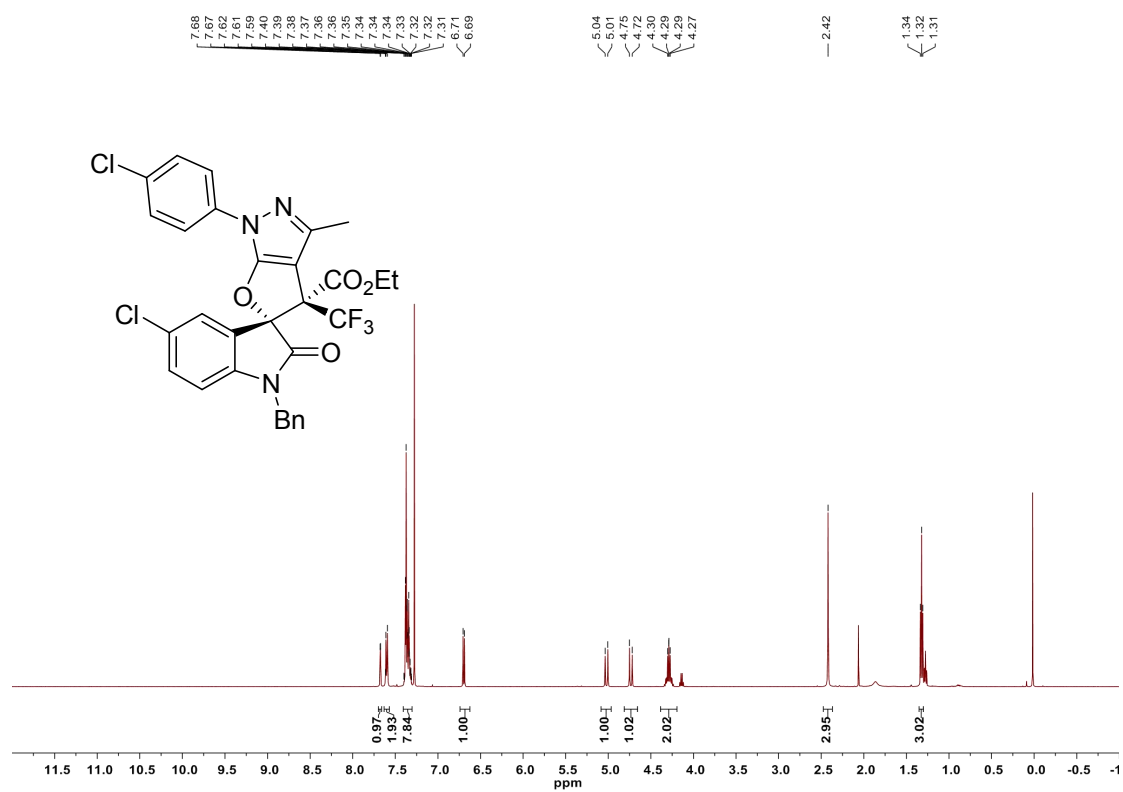

### <sup>13</sup>C NMR spectrum of 4r (CDCl<sub>3</sub>, 125 MHz)

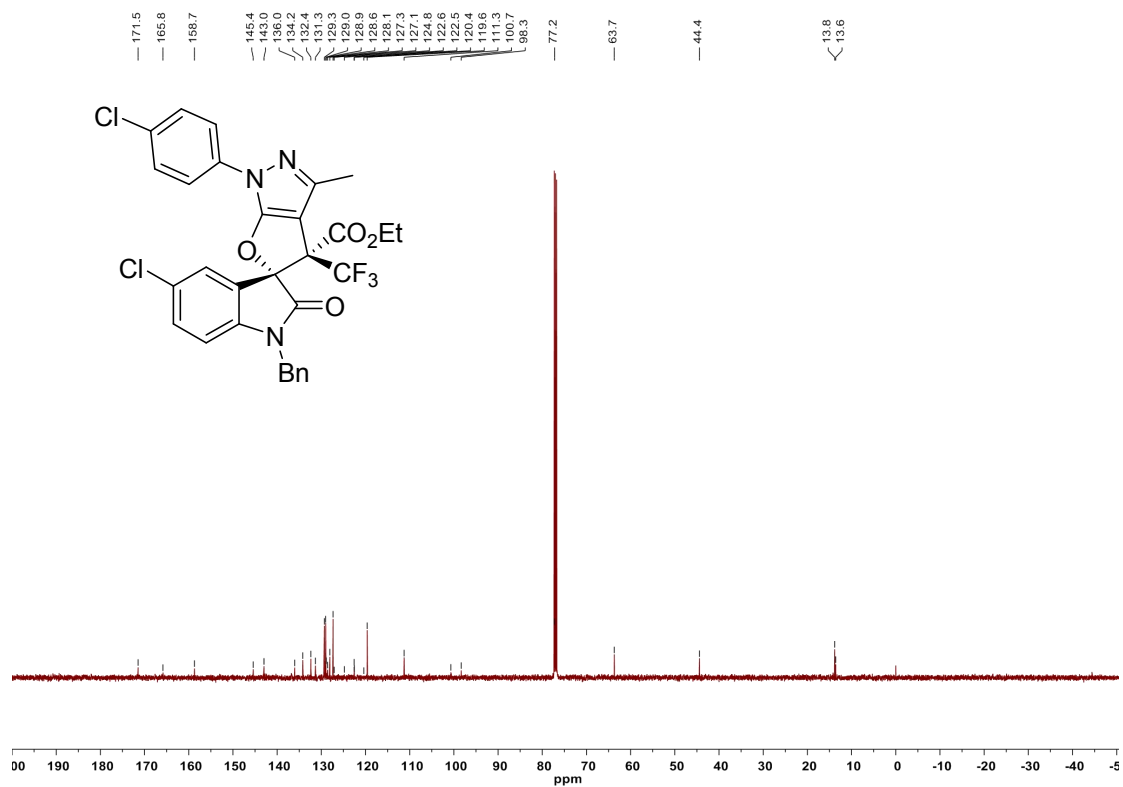

## HPLC chromatograms of 4r

### 4r-rac

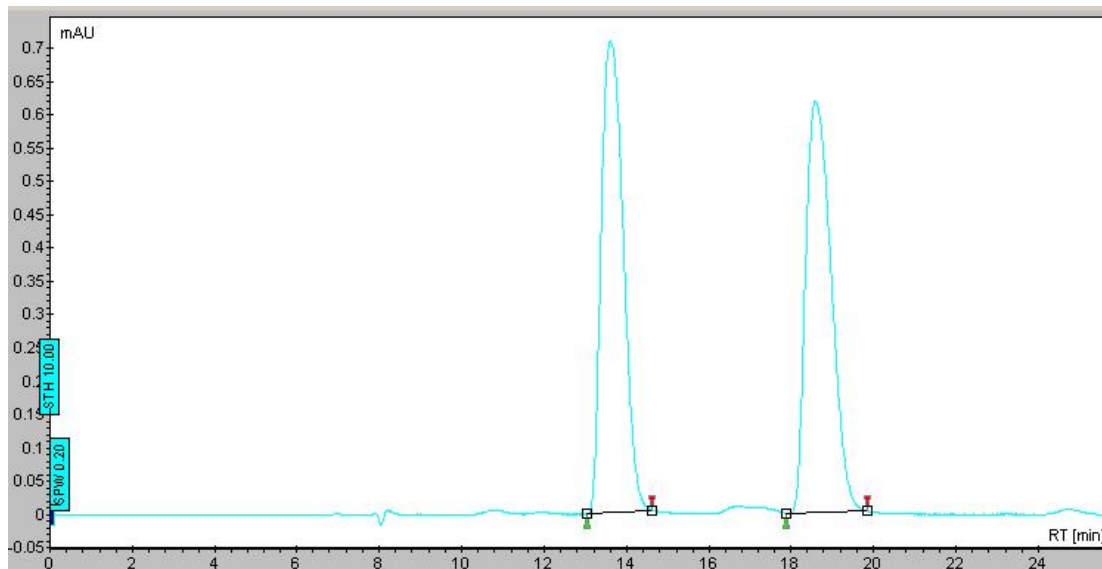

| # | Start time[min] | Time[min] | End time[min] | Area%  |
|---|-----------------|-----------|---------------|--------|
| 1 | 13.039          | 13.612    | 14.615        | 49.700 |
| 2 | 17.875          | 18.585    | 19.845        | 50.300 |

### 4r-chr

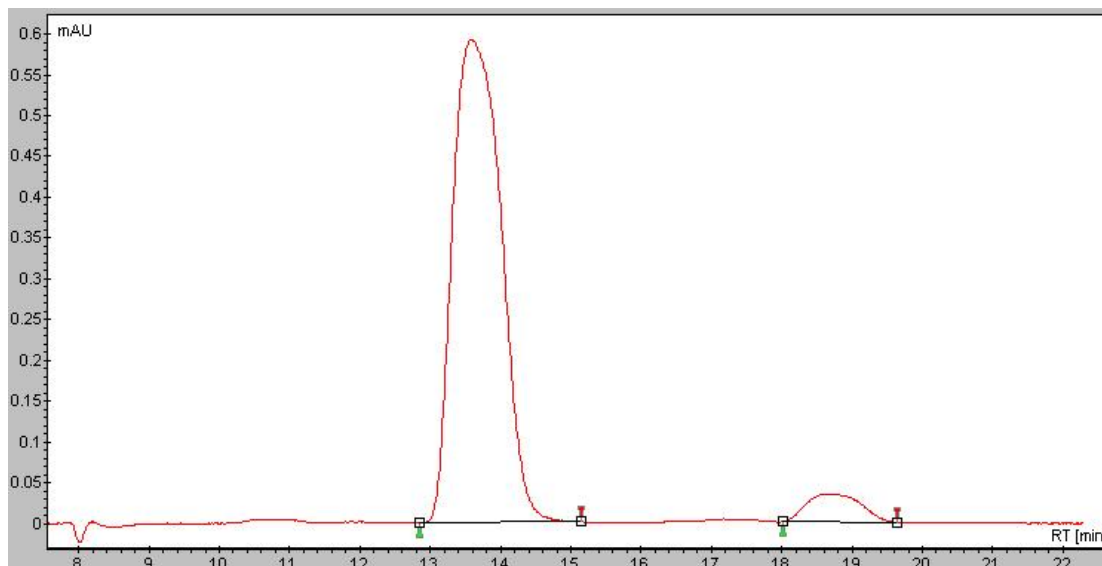

| # | Start time[min] | Time[min] | End time[min] | Area%  |
|---|-----------------|-----------|---------------|--------|
| 1 | 12.839          | 13.586    | 15.146        | 93.928 |
| 2 | 18.025          | 18.639    | 19.636        | 6.072  |

### <sup>1</sup>H NMR spectrum of 4s (CDCl<sub>3</sub>, 500 MHz)

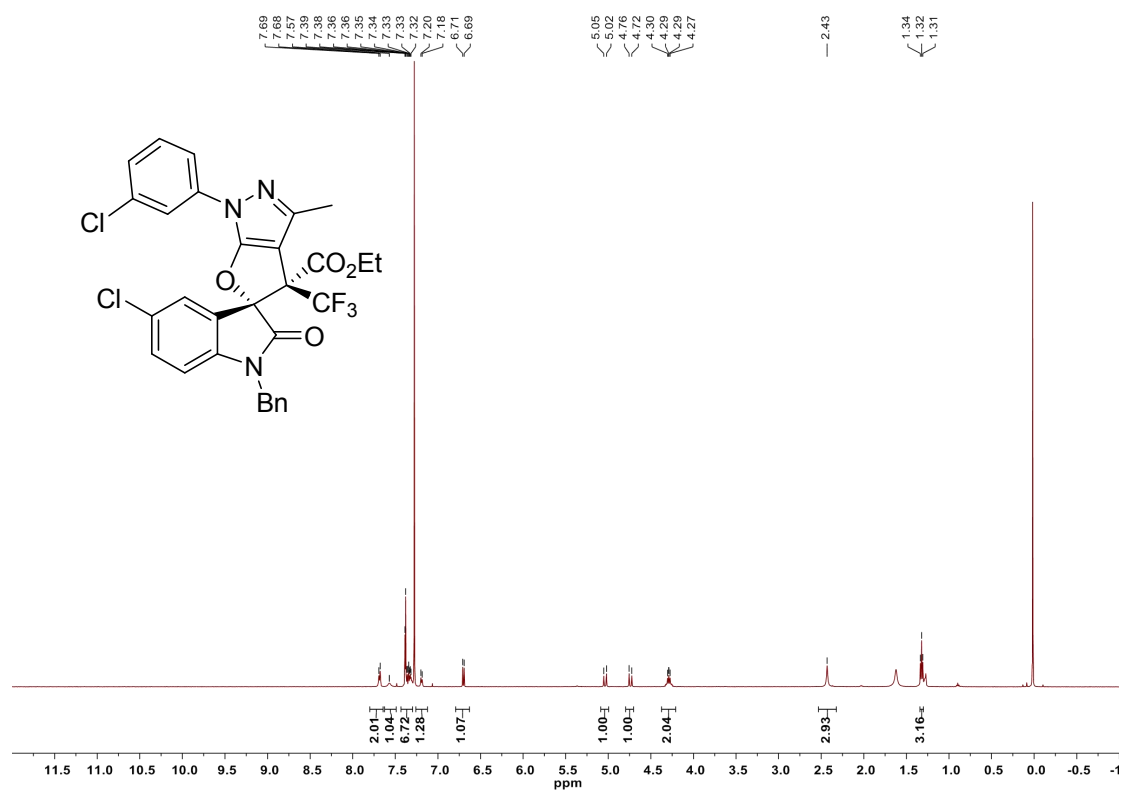

### <sup>13</sup>C NMR spectrum of 4s (CDCl<sub>3</sub>, 125 MHz)

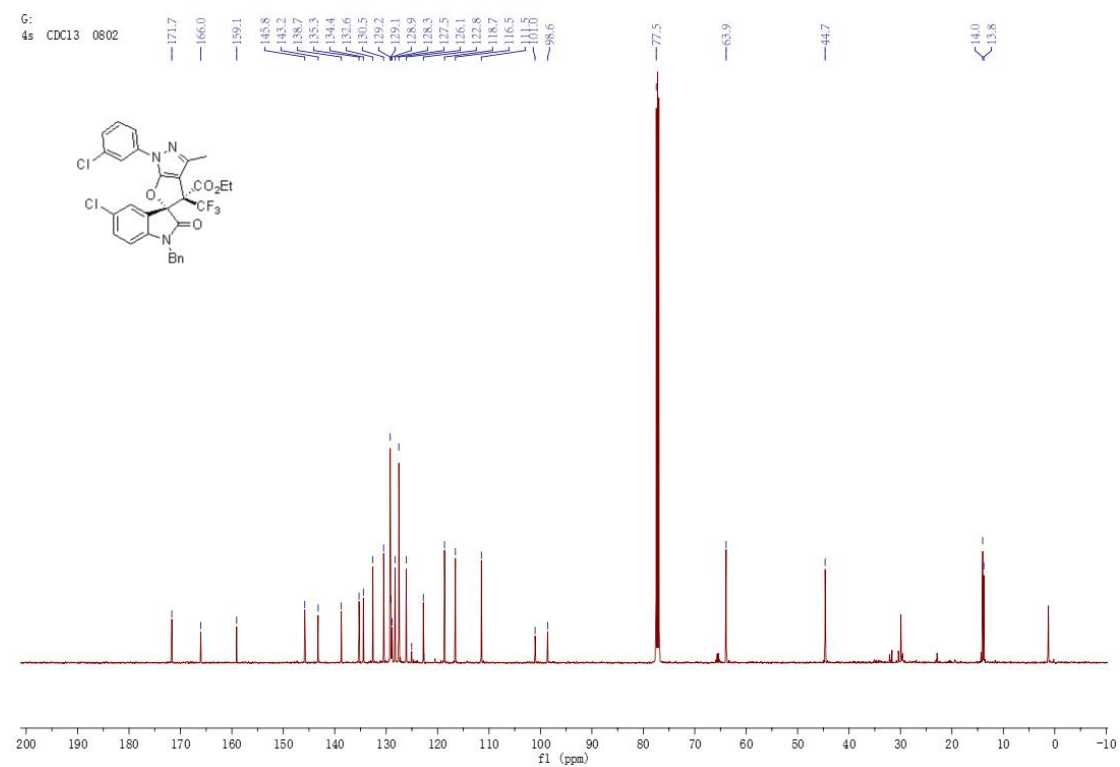

## HPLC chromatograms of 4s

### 4s-rac

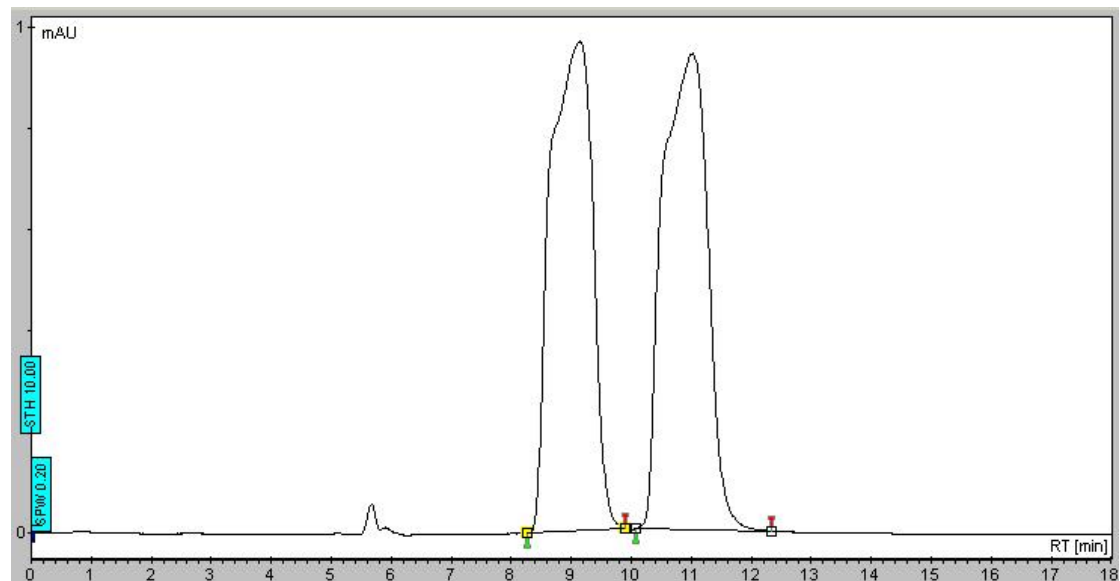

| # | Start time[min] | Time[min] | End time[min] | Area%  |
|---|-----------------|-----------|---------------|--------|
| 1 | 8.266           | 9.146     | 9.899         | 49.042 |
| 2 | 10.074          | 11.026    | 12.335        | 50.958 |

### 4s-chr

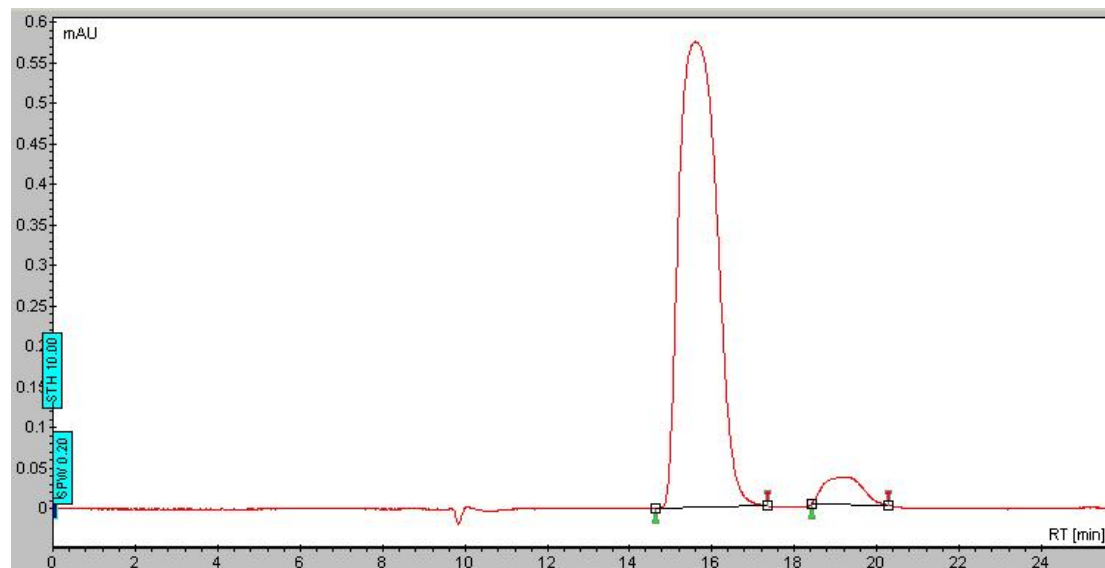

| # | Start time[min] | Time[min] | End time[min] | Area%  |
|---|-----------------|-----------|---------------|--------|
| 1 | 14.626          | 15.599    | 17.344        | 94.342 |
| 2 | 18.416          | 19.279    | 20.276        | 5.658  |



### $^1\text{H}$ NMR spectrum of 4t ( $\text{CDCl}_3$ , 500 MHz)

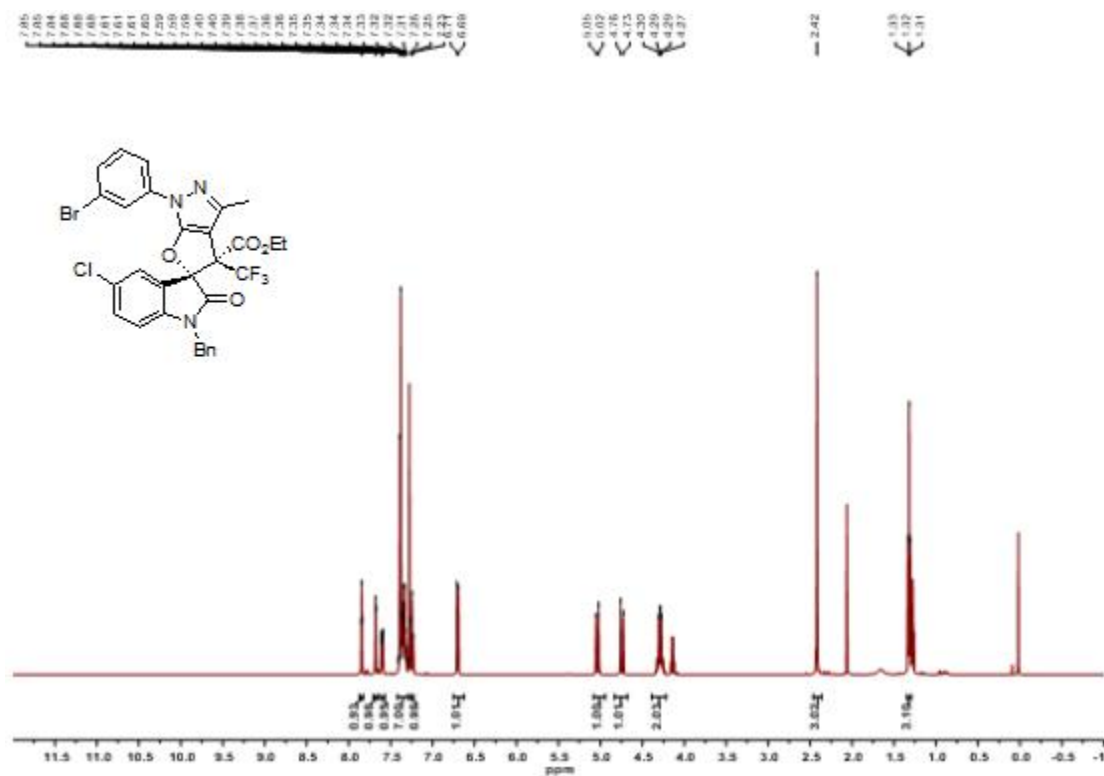

### $^{13}\text{C}$ NMR spectrum of 4t ( $\text{CDCl}_3$ , 125 MHz)

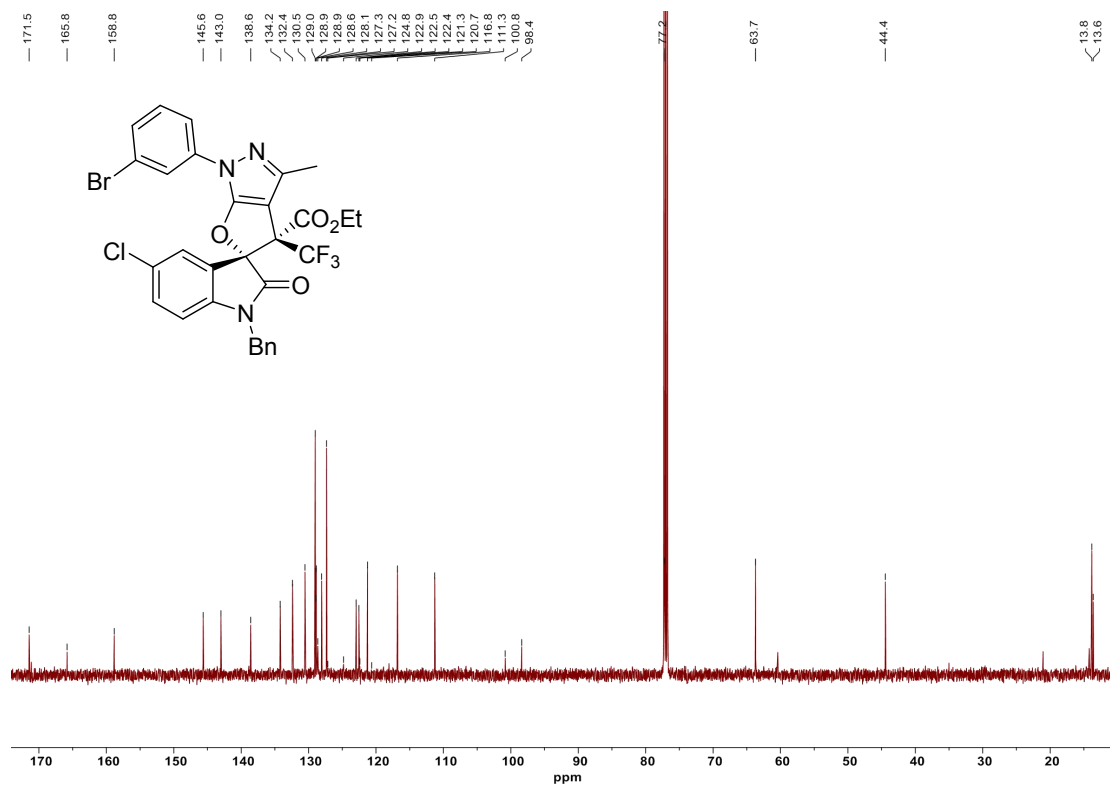

## HPLC chromatograms of 4t

### 4t-rac

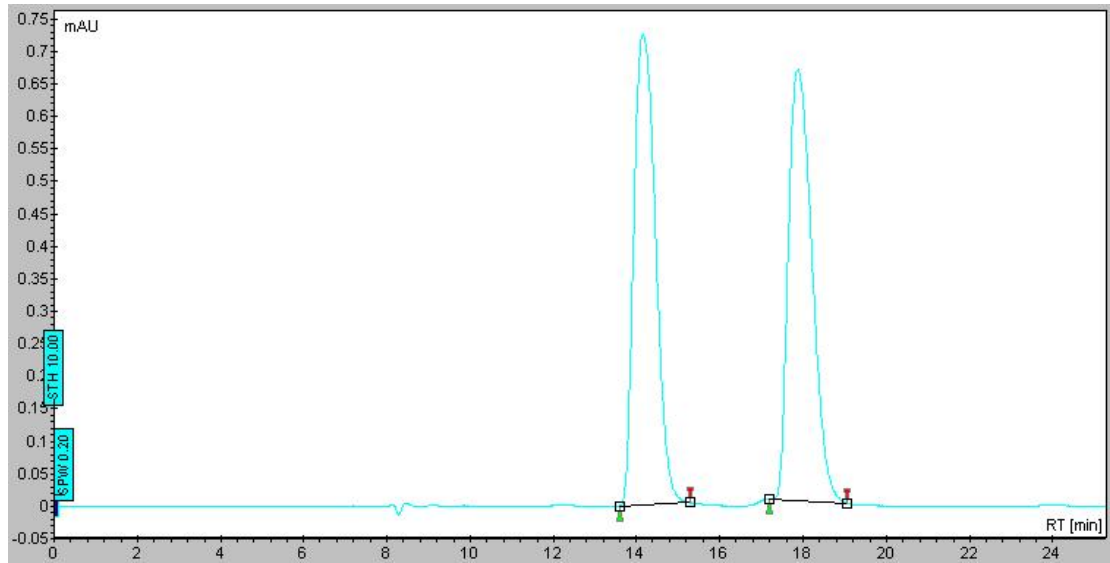

| # | Start time[min] | Time[min] | End time[min] | Area%  |
|---|-----------------|-----------|---------------|--------|
| 1 | 13.598          | 14.146    | 15.289        | 50.108 |
| 2 | 17.191          | 17.892    | 19.058        | 49.892 |

### 4t-chr

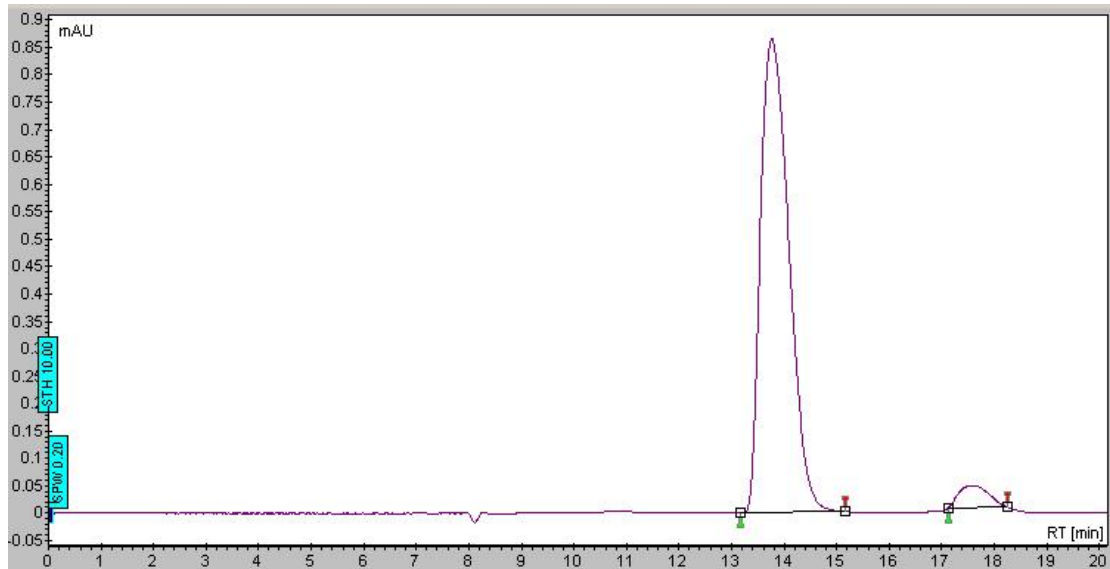

| # | Start time[min] | Time[min] | End time[min] | Area%  |
|---|-----------------|-----------|---------------|--------|
| 1 | 13.169          | 13.759    | 15.162        | 95.348 |
| 2 | 17.128          | 17.559    | 18.251        | 4.652  |

### <sup>1</sup>H NMR spectrum of 4u (CDCl<sub>3</sub>, 500 MHz)

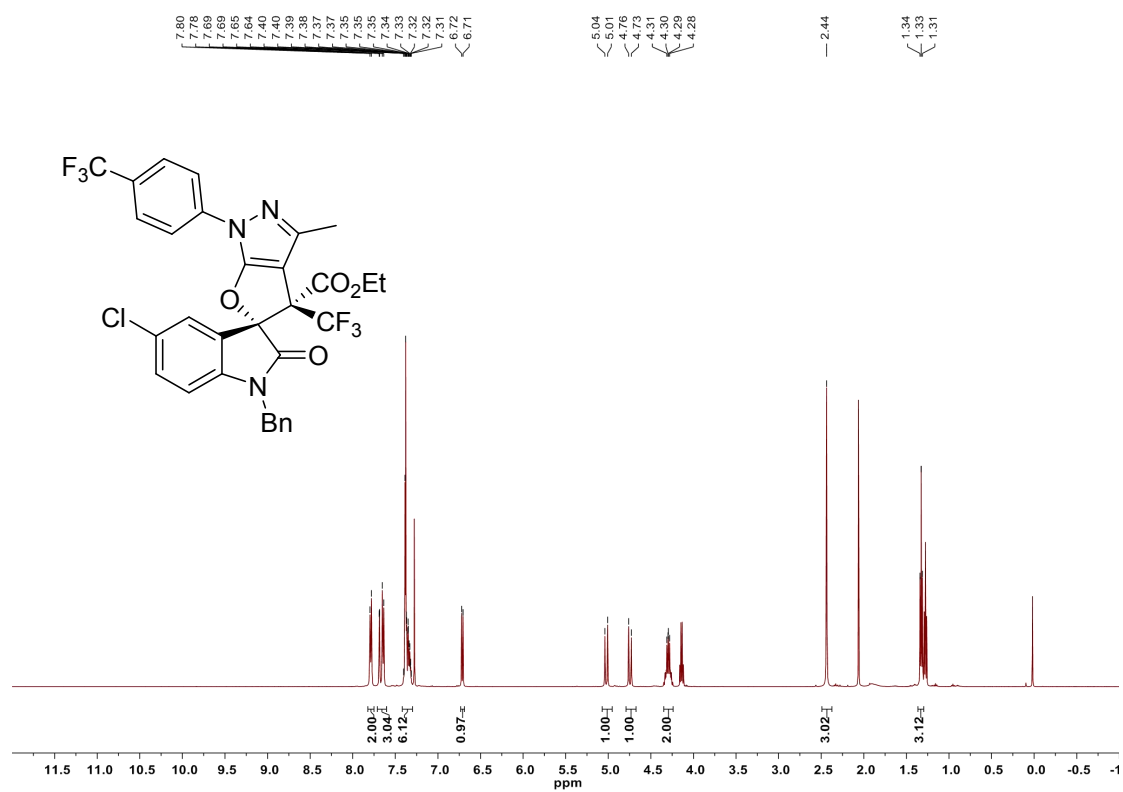

### <sup>13</sup>C NMR spectrum of 4u (CDCl<sub>3</sub>, 125 MHz)

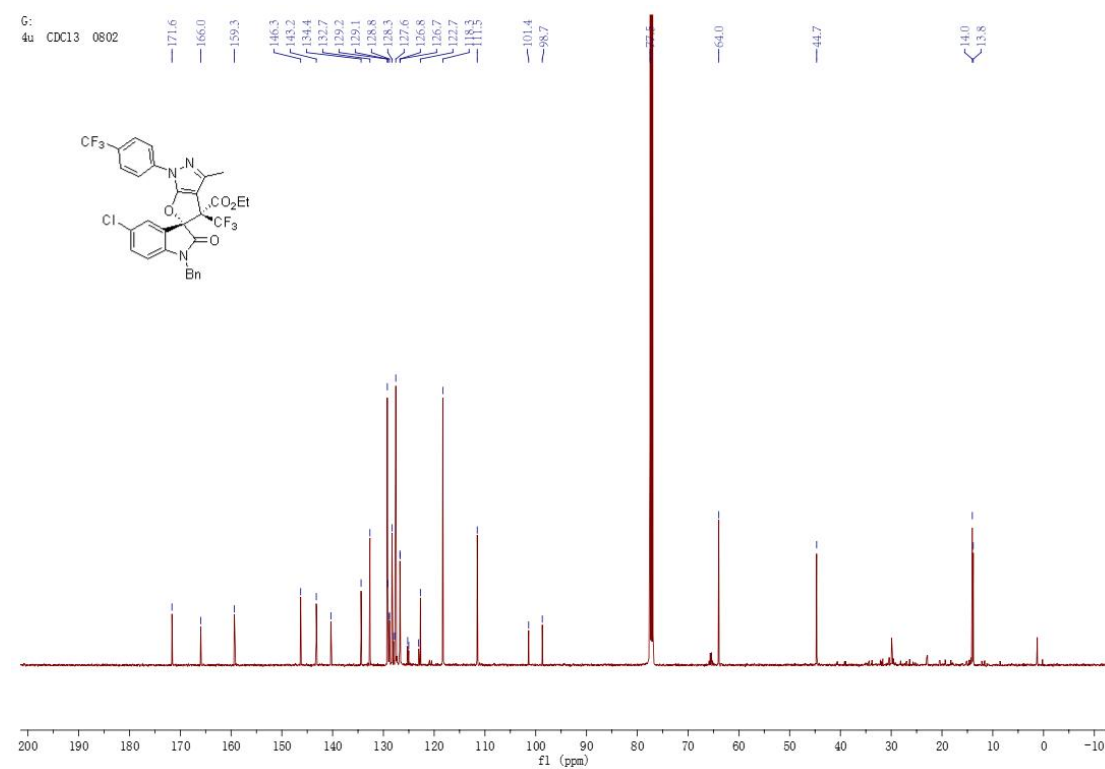

## HPLC chromatograms of 4u

### 4u-rac

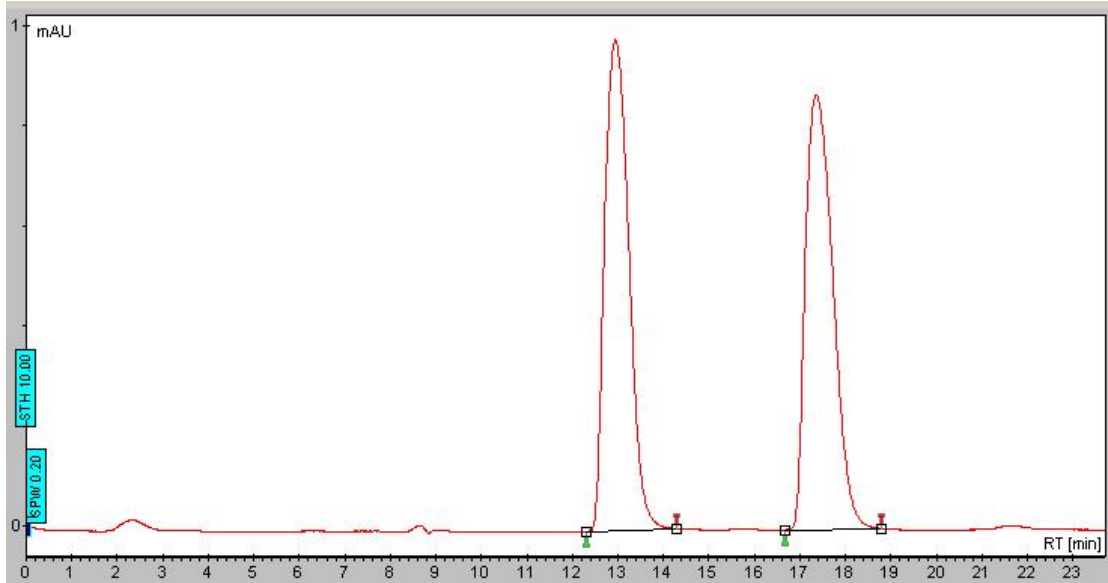

| # | Start time[min] | Time[min] | End time[min] | Area%  |
|---|-----------------|-----------|---------------|--------|
| 1 | 12.307          | 12.946    | 14.292        | 49.711 |
| 2 | 16.673          | 17.345    | 18.791        | 50.289 |

### 4u-chr

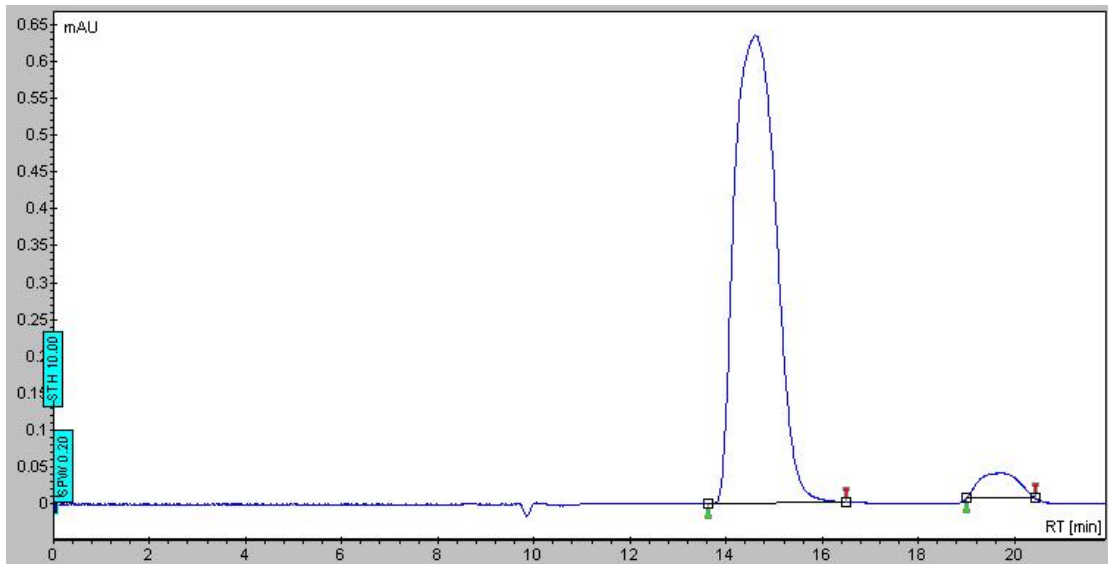

| # | Start time[min] | Time[min] | End time[min] | Area%  |
|---|-----------------|-----------|---------------|--------|
| 1 | 13.627          | 14.599    | 16.499        | 95.117 |
| 2 | 19.004          | 19.732    | 20.440        | 4.883  |

### <sup>1</sup>H NMR spectrum of 4v (CDCl<sub>3</sub>, 500 MHz)

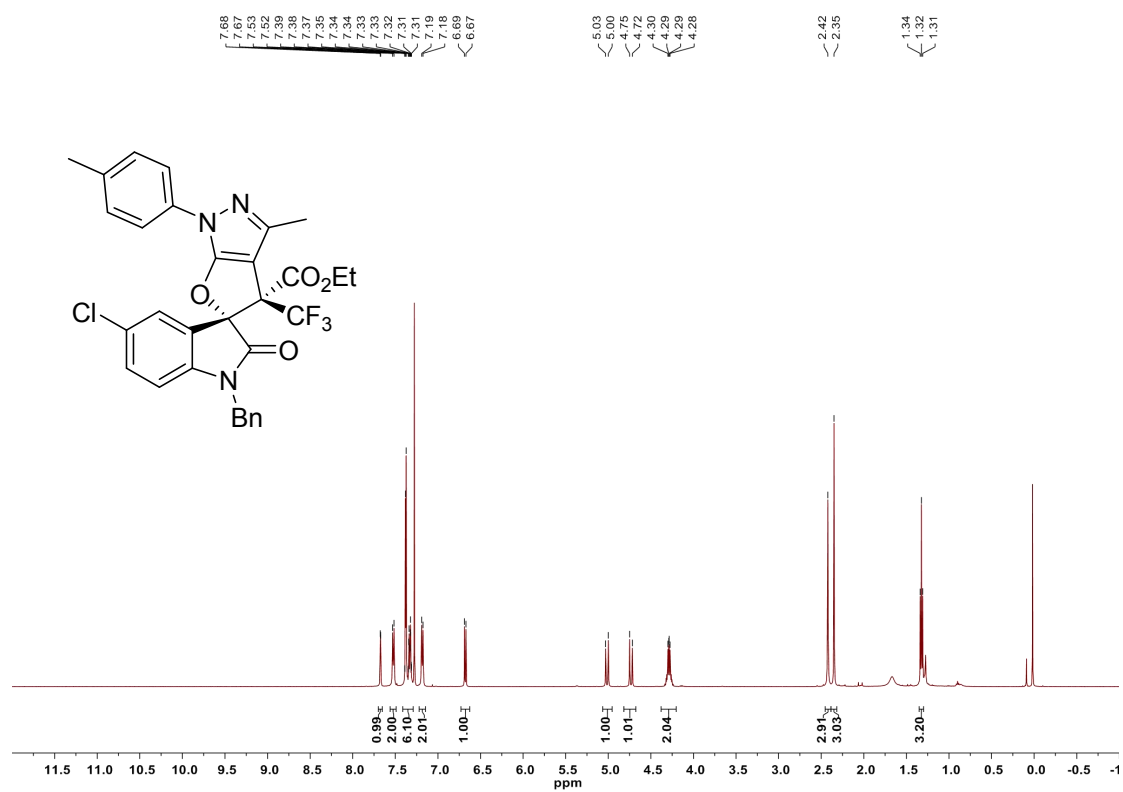

### <sup>13</sup>C NMR spectrum of 4v (CDCl<sub>3</sub>, 125 MHz)

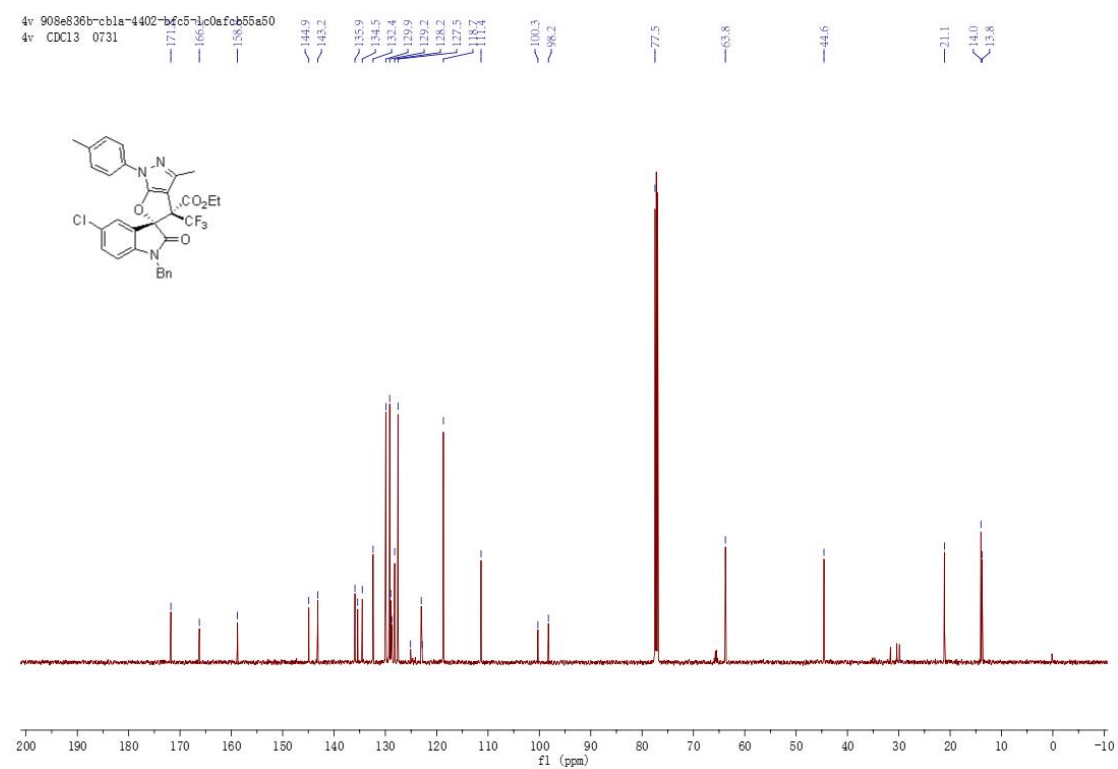

## HPLC chromatograms of 4v

### 4v-rac

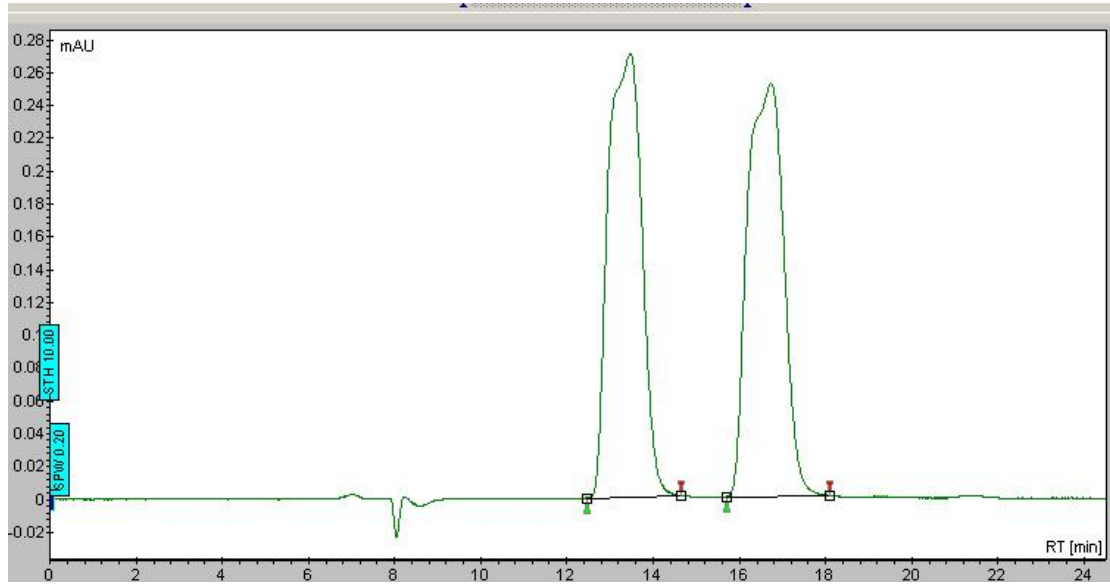

| # | Start time[min] | Time[min] | End time[min] | Area%  |
|---|-----------------|-----------|---------------|--------|
| 1 | 12.465          | 13.466    | 14.651        | 50.040 |
| 2 | 15.709          | 16.732    | 18.100        | 49.960 |

### 4v-chr

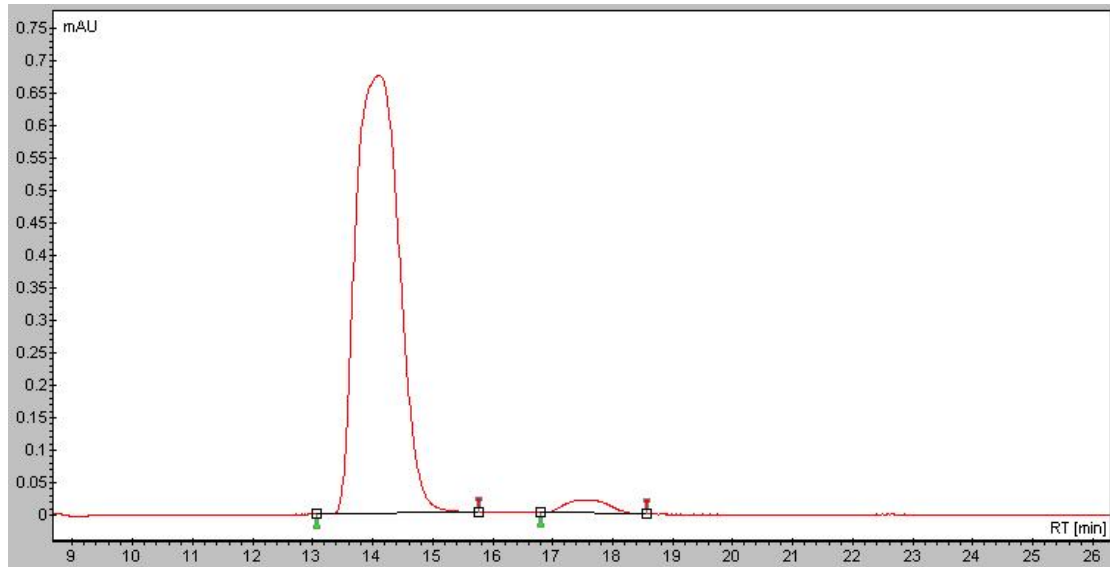

| # | Start time[min] | Time[min] | End time[min] | Area%  |
|---|-----------------|-----------|---------------|--------|
| 1 | 13.065          | 14.106    | 15.756        | 96.993 |
| 2 | 16.802          | 17.625    | 18.563        | 3.007  |

**<sup>1</sup>H NMR spectrum of 4w (CDCl<sub>3</sub>, 500 MHz)**

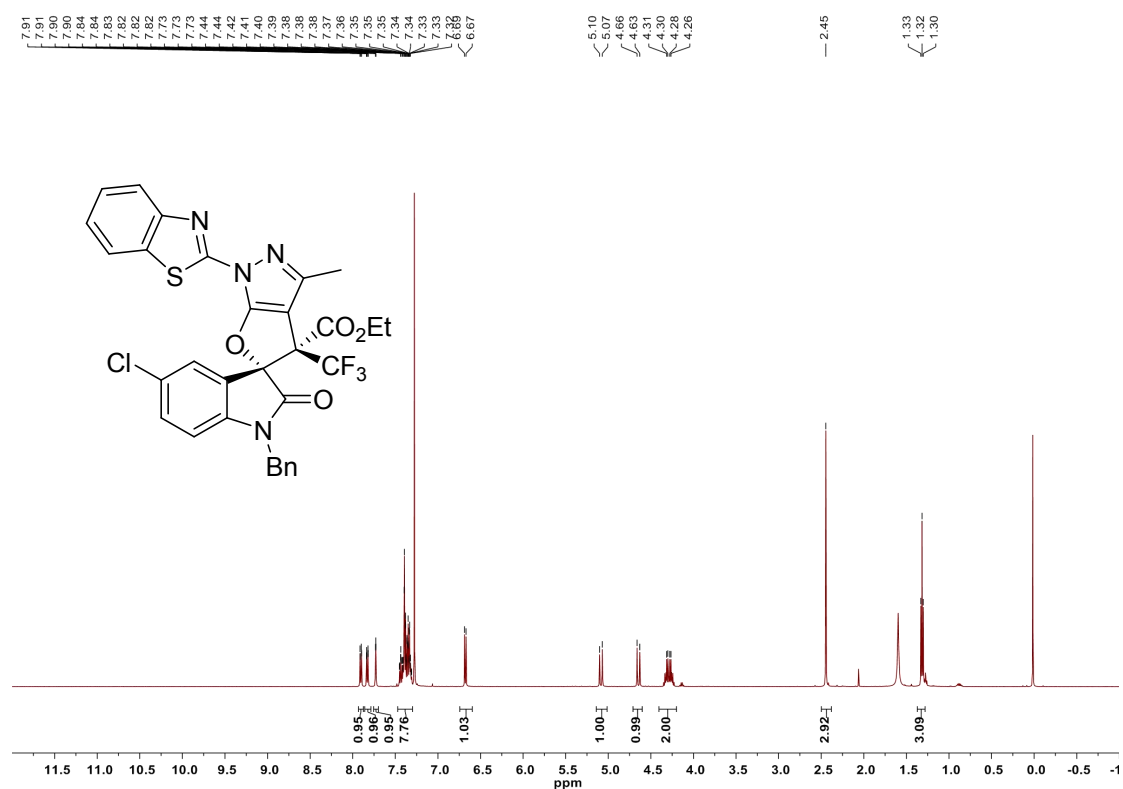

**<sup>13</sup>C NMR spectrum of 4w (CDCl<sub>3</sub>, 125 MHz)**

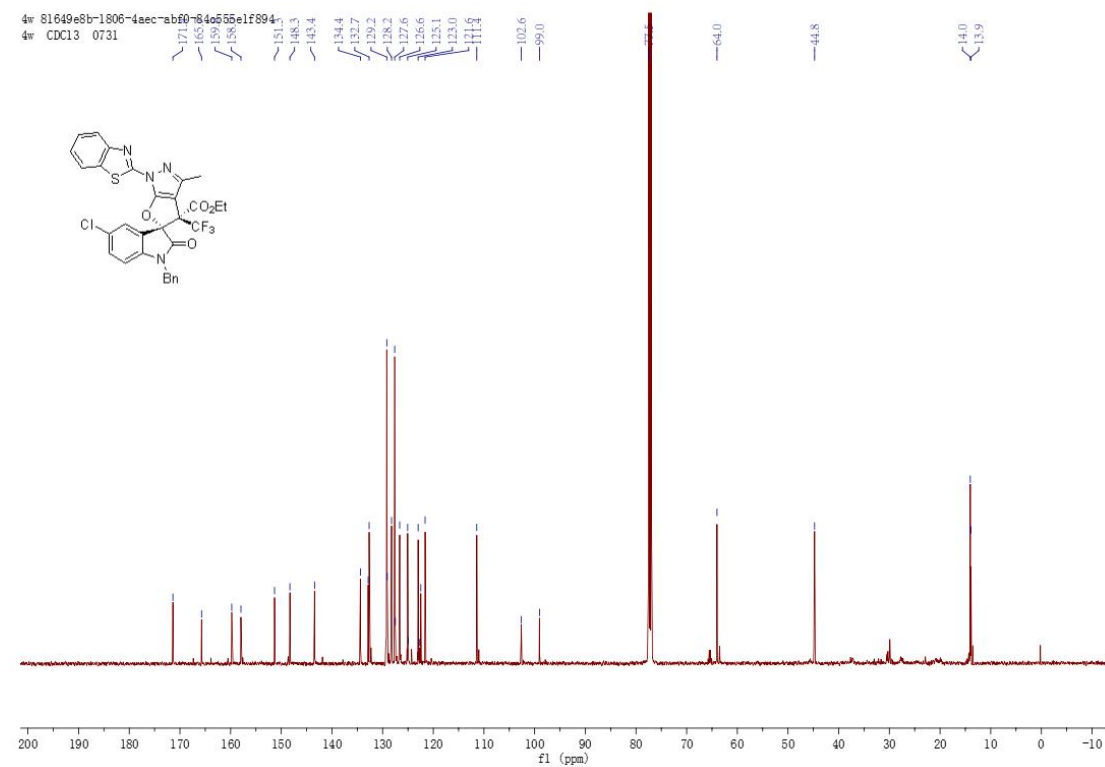

## HPLC chromatograms of 4w

### 4w-rac

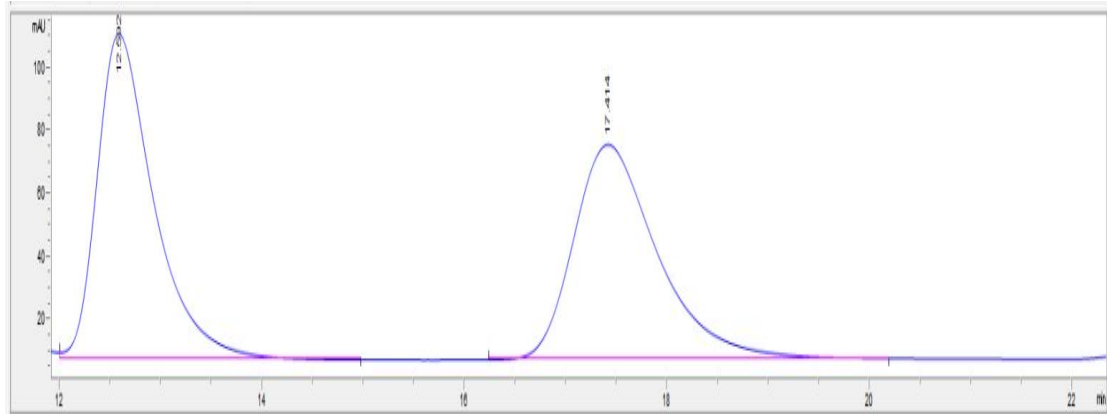

| # | 时间     | 峰面积    | 峰高    | 峰宽     | 对称因子  | 峰面积 %  | 类型 |
|---|--------|--------|-------|--------|-------|--------|----|
| 1 | 12.592 | 4048.7 | 103.8 | 0.5809 | 0.581 | 50.724 | VB |
| 2 | 17.414 | 3933.1 | 68.4  | 0.8687 | 0.652 | 49.276 | BB |

### 4w-chr

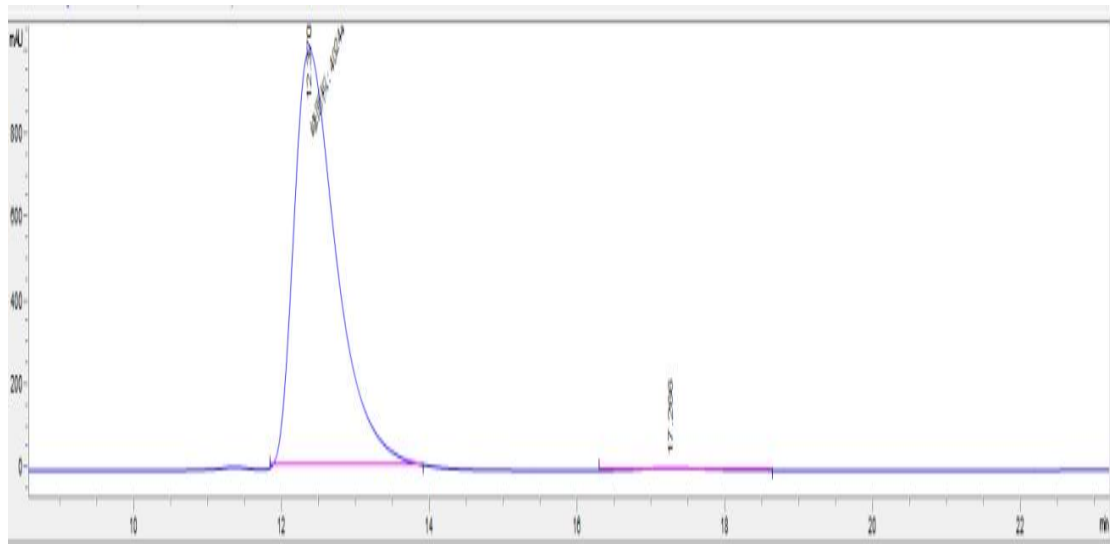

| # | 时间     | 峰面积   | 峰高   | 峰宽     | 对称因子  | 峰面积 %  | 类型 |
|---|--------|-------|------|--------|-------|--------|----|
| 1 | 12.37  | 40244 | 1002 | 0.6694 | 0.545 | 99.196 | MM |
| 2 | 17.266 | 326.1 | 5.8  | 0.6617 | 0.808 | 0.804  | BB |



**<sup>1</sup>H NMR spectrum of 4x (CDCl<sub>3</sub>, 500 MHz)**

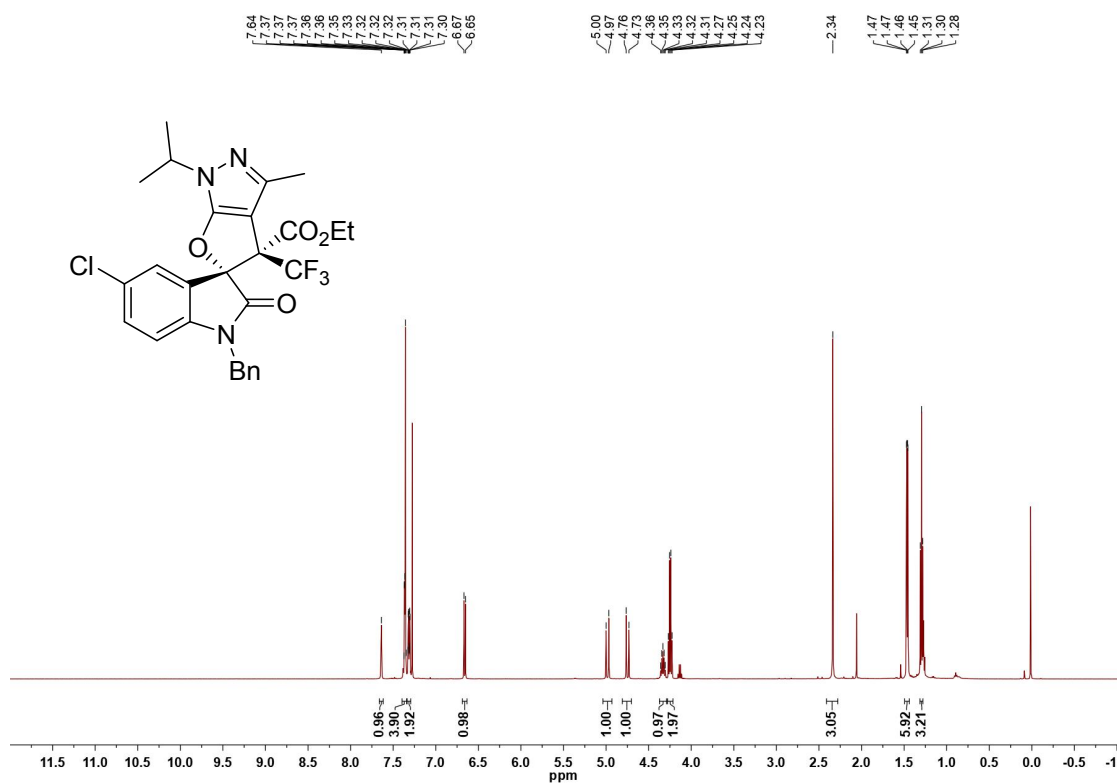

**<sup>13</sup>C NMR spectrum of 4x (CDCl<sub>3</sub>, 125 MHz)**

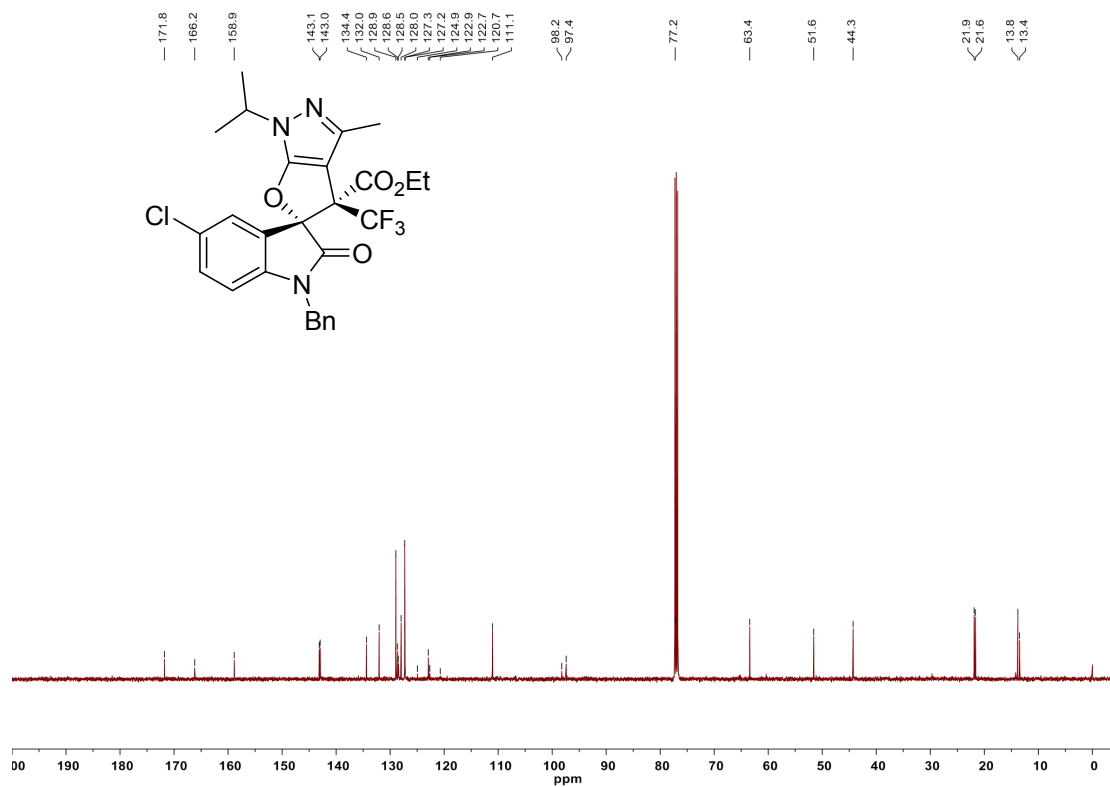

## HPLC chromatograms of 4x

### 4x-rac

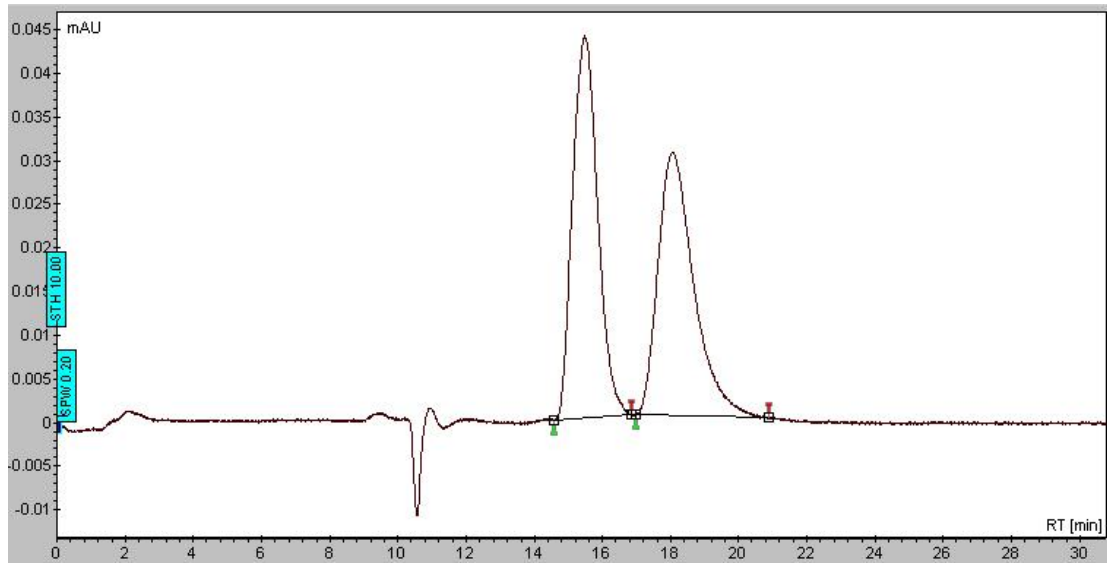

| # | Start time[min] | Time[min] | End time[min] | Area%  |
|---|-----------------|-----------|---------------|--------|
| 1 | 14.579          | 15.492    | 16.851        | 50.496 |
| 2 | 16.980          | 18.065    | 20.882        | 49.504 |

### 4x-chr

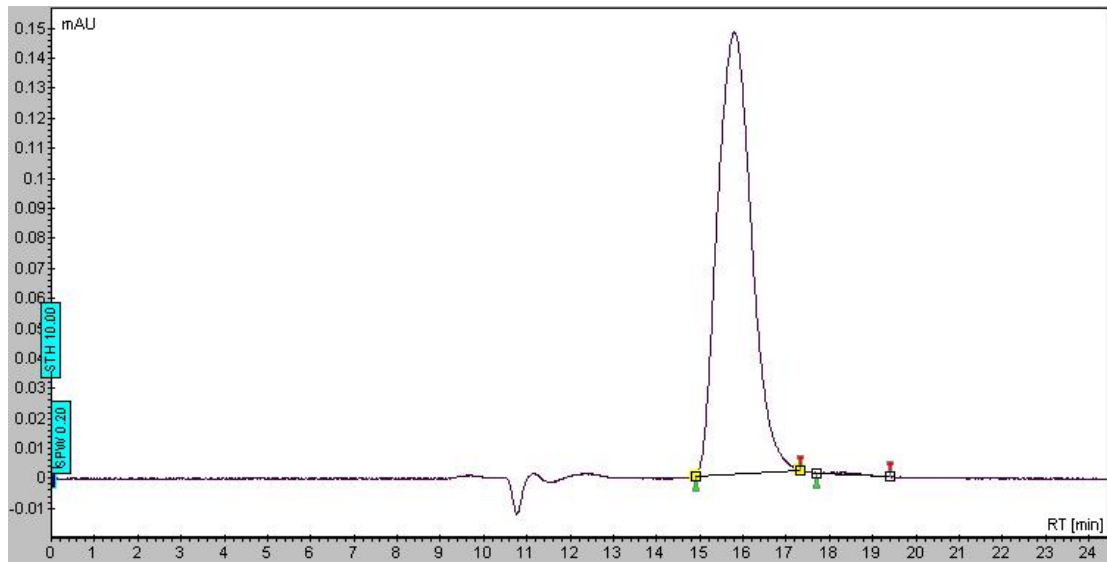

| # | Start time[min] | Time[min] | End time[min] | Area%  |
|---|-----------------|-----------|---------------|--------|
| 1 | 14.909          | 15.799    | 17.326        | 99.705 |
| 2 | 17.700          | 18.359    | 19.402        | 0.295  |

## 6. X-ray crystal structure of the compound **4c**

Suitable crystals of enantiopure **4c** for X-ray analysis were obtained from crystallization in CH<sub>2</sub>Cl<sub>2</sub>.

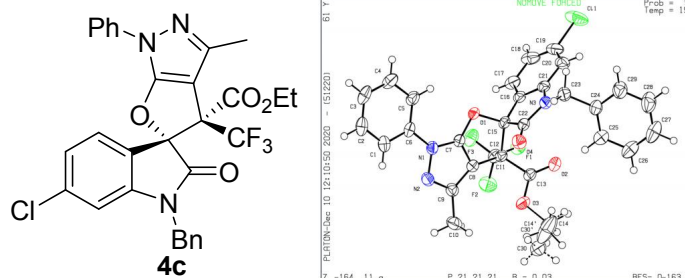

The thermal ellipsoids are shown at 50% probability level

**Table S1.** Crystal data and structure refinement parameters of the compound **4c**

| Parameter                       | Value                                                                                                                     |
|---------------------------------|---------------------------------------------------------------------------------------------------------------------------|
| Formula weight                  | 581.96                                                                                                                    |
| Temperature                     | 193(2) K                                                                                                                  |
| Wavelength                      | 0.71073 Å                                                                                                                 |
| Crystal system                  | Orthorhombic                                                                                                              |
| Space group                     | P212121                                                                                                                   |
| Unit cell dimensions            | $a = 9.5219(5)$ Å $\alpha = 90^\circ$<br>$b = 11.5329(6)$ Å $\beta = 90^\circ$<br>$c = 24.5713(14)$ Å $\gamma = 90^\circ$ |
| Volume                          | $2698.3(3)$ Å <sup>3</sup>                                                                                                |
| <i>Z</i>                        | 4                                                                                                                         |
| Density (calculated)            | 1.433 Mg/m <sup>3</sup>                                                                                                   |
| Absorption coefficient          | 0.205 mm <sup>-1</sup>                                                                                                    |
| <i>F</i> <sub>000</sub>         | 1200                                                                                                                      |
| Crystal size                    | 0.120 x 0.110 x 0.080 mm <sup>3</sup>                                                                                     |
| Theta range for data collection | 1.951° to 27.502°<br>$-11 \leq h \leq 12$                                                                                 |
| Index ranges                    | $-14 \leq k \leq 14$<br>$-28 \leq l \leq 31$                                                                              |
| Reflections collected           | 25178                                                                                                                     |
| Independent reflections         | 6159 [R(int) = 0.0476]                                                                                                    |
| Completeness to theta = 25.242° | 99.2 %                                                                                                                    |
| Refinement method               | Full-matrix least-squares on F <sup>2</sup>                                                                               |

---

|                                      |                                     |
|--------------------------------------|-------------------------------------|
| Data / restraints / parameters       | 6159 / 6 / 383                      |
| Goodness-of-fit on F2                | 1.030                               |
| Final R indices [ $I > 2\sigma(I)$ ] | $R_1 = 0.0348, \omega R_2 = 0.0824$ |
| R indices (all data)                 | $R_1 = 0.0400, \omega R_2 = 0.0863$ |
| Absolute structure parameter         | 0.07(3)                             |
| Extinction coefficient               | n/a                                 |
| Largest diff. peak and hole          | 0.196 and -0.239 e.Å <sup>-3</sup>  |

---
